# Supplementary material for: Developing global vulnerabilities and conservation priorities for cave-dwelling bats
Source: Research Square preprint supplement (doi:10.21203/rs.3.rs-492875/v1), 2021-05-13
Supplement: Supplementary file 1 [file 07cae8b5cfb3b12a9701f8f1.docx]

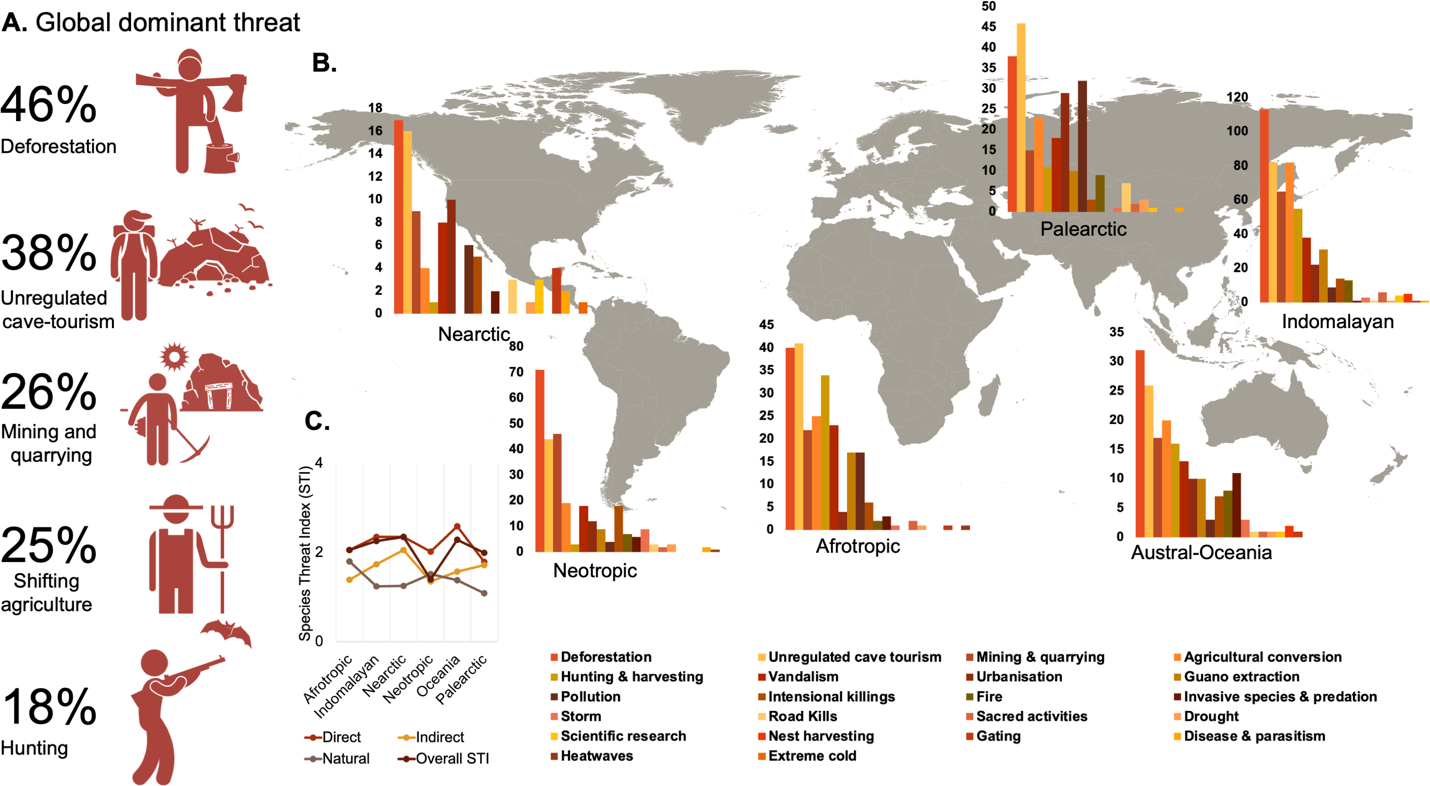


Supplementary Figure 2. Distribution of global dominant threats (A) and biogeographical patterns (frequency) of threatening process (B) and mean threat index (C). Complete threat distribution per species are supplemented in Supplementary Data 1.
