# Supplementary material for: Developing global vulnerabilities and conservation priorities for cave-dwelling bats
Source: Research Square preprint supplement (doi:10.21203/rs.3.rs-492875/v1), 2021-05-13
Supplement: Supplementary file 2 [file 240eda4ded7c529c68a4fe80.docx]

**Supplementary Data 4.** Summary of threatening process across biogeographical realm and Species Threat Index (SPI) in each ecological dimension.

**Supplementary Data 4A.** Number of species threatened by each threatening process across biogeographical realm. Nan indicates 0 species threatened.

| Biogeographical realm | Afrotropic | Indo-Malayan | Nearctic | Neotropic | Oceania | Palearctic | Global N |
| --- | --- | --- | --- | --- | --- | --- | --- |
| Deforestation | 40 | 113 | 17 | 71 | 32 | 38 | 311 |
| Unregulated cave tourism | 41 | 82 | 16 | 44 | 26 | 46 | 255 |
| Mining & quarrying | 22 | 65 | 9 | 46 | 17 | 15 | 174 |
| Agricultural conversion | 25 | 82 | 4 | 19 | 20 | 23 | 173 |
| Hunting & harvesting | 34 | 55 | 1 | 3 | 16 | 11 | 120 |
| Vandalism | 23 | 38 | 8 | 18 | 13 | 18 | 118 |
| Urbanisation | 4 | 22 | 10 | 12 | 10 | 29 | 87 |
| Guano extraction | 17 | 31 | 0 | 9 | 10 | 10 | 77 |
| Pollution | 17 | 9 | 6 | 4 | 3 | 32 | 71 |
| Intensional killings | 6 | 14 | 5 | 18 | 7 | 3 | 53 |
| Fire | 2 | 13 | 0 | 7 | 8 | 9 | 39 |
| Invasive species & predation | 3 | 1 | 2 | 6 | 11 | 0 | 23 |
| Storm | 1 | 3 | 0 | 9 | 3 | 1 | 17 |
| Road Kills | 0 | 1 | 3 | 3 | 1 | 7 | 15 |
| Sacred activities | 2 | 6 | 0 | 2 | 1 | 2 | 13 |
| Drought | 1 | 1 | 1 | 3 | 1 | 3 | 10 |
| Scientific research | 0 | 4 | 3 | 0 | 1 | 1 | 9 |
| Nest harvesting | 0 | 5 | 0 | 0 | 2 | 0 | 7 |
| Gating | 1 | 1 | 4 | 0 | 1 | 0 | 7 |
| Disease & parasitism | 0 | 1 | 2 | 2 | 0 | 1 | 6 |
| Heatwaves | 1 | 0 | 0 | 1 | 0 | 0 | 2 |
| Extreme cold | 0 | 0 | 1 | 0 | 0 | 0 | 1 |

**Supplementary Data 4B.** Species Threat Index calculated for population trends

| Population trends | T direct | T indirect | T natural | T overall |
| --- | --- | --- | --- | --- |
| Unknown | 2.08 | 1.47 | 1.39 | 2.52 |
| Stable | 2.03 | 1.67 | 1.45 | 2.75 |
| Decreasing | 2.34 | 1.75 | 1.4 | 3.43 |
| Increasing | 2 | 1.67 | 1 | 4 |
|  |  |  |  |  |
| Species Threat Index | **χ²** | **df** | **p** |
| T direct | 3.26 | 3 | 0.354 |
| T indirect | 7.66 | 3 | 0.054 |
| T natural | 0.61 | 3 | 0.895 |

**Supplementary Data 4C.** Species Threat Index calculated for conservation status

| Conservation Status | T direct | T indirect | T natural | T overall |
| --- | --- | --- | --- | --- |
| Least Concern | 2.06 | 1.59 | 1.28 | 2.61 |
| Vulnerable | 2.53 | 1.62 | 1.53 | 3.58 |
| Data Deficient | 2.27 | 1.3 | 1 | 2.69 |
| Critically Endangered | 2.13 | 1.6 | 1.2 | 3.1 |
| Near Threatened | 2.26 | 1.79 | 1.55 | 3.31 |
| Endangered | 2.06 | 1.71 | 2 | 3.5 |
|  |  |  |  |  |
| Species Threat Index | **χ²** | **df** | **p** |
| T direct | 6.81 | 5 | 0.235 |
| T indirect | 5.43 | 5 | 0.365 |
| T natural | 5.94 | 5 | 0.312 |

**Supplementary Data 4D.** Species Threat Index calculated for geopolitical endemism

| Geopolitical Endemism | T direct | T indirect | T natural | T overall |
| --- | --- | --- | --- | --- |
| Non endemic | 2.14 | 1.58 | 1.29 | 2.77 |
| Endemic | 2.16 | 1.64 | 1.55 | 2.99 |
|  |  |  |  |  |
| Species Threat Index | **χ²** | **df** | **p** |
| T direct | 0.04 | 1 | 0.834 |
| T indirect | 0.5 | 1 | 0.481 |
| T natural | 2.2 | 1 | 0.138 |

**Supplementary Data 4E.** Species Threat Index calculated for Island endemism

| **Island Endemism** | **T direct** | **T indirect** | **T natural** | **T overall** |
| --- | --- | --- | --- | --- |
| Islandic | 2.13 | 1.49 | 1.7 | 2.8 |
| Non-islandic | 2.16 | 1.62 | 1.28 | 2.85 |
|  |  |  |  |  |
| **Species Threat Index** | **χ²** | **df** | **p** |
| T direct | 0.12 | 1 | 0.727 |
| T indirect | 2.21 | 1 | 0.137 |
| T natural | 8.32 | 1 | 0.004 |

**Supplementary Data 4F.** Species Threat Index calculated for Island endemism

| **Trophic level** | **T direct** | **T indirect** | **T natural** | **T overall** |
| --- | --- | --- | --- | --- |
| Herbivore | 3 | 1.44 | 1.29 | 3.41 |
| Carnivore | 2.04 | 1.63 | 1.45 | 2.8 |
| Omnivore | 2.22 | 1.45 | 1.13 | 2.57 |
|  |  |  |  |  |
| **Species Threat Index** | **χ²** | **df** | **p** |
| T direct | 13.36 | 2 | 0.001 |
| T indirect | 4.23 | 2 | 0.121 |
| T natural | 2.06 | 2 | 0.358 |
