# Supplementary material for: Developing global vulnerabilities and conservation priorities for cave-dwelling bats
Source: Research Square preprint supplement (doi:10.21203/rs.3.rs-492875/v1), 2021-05-13
Supplement: Supplementary file 3 [file 42fdb11ca13fa1fef3fde5ce.docx]

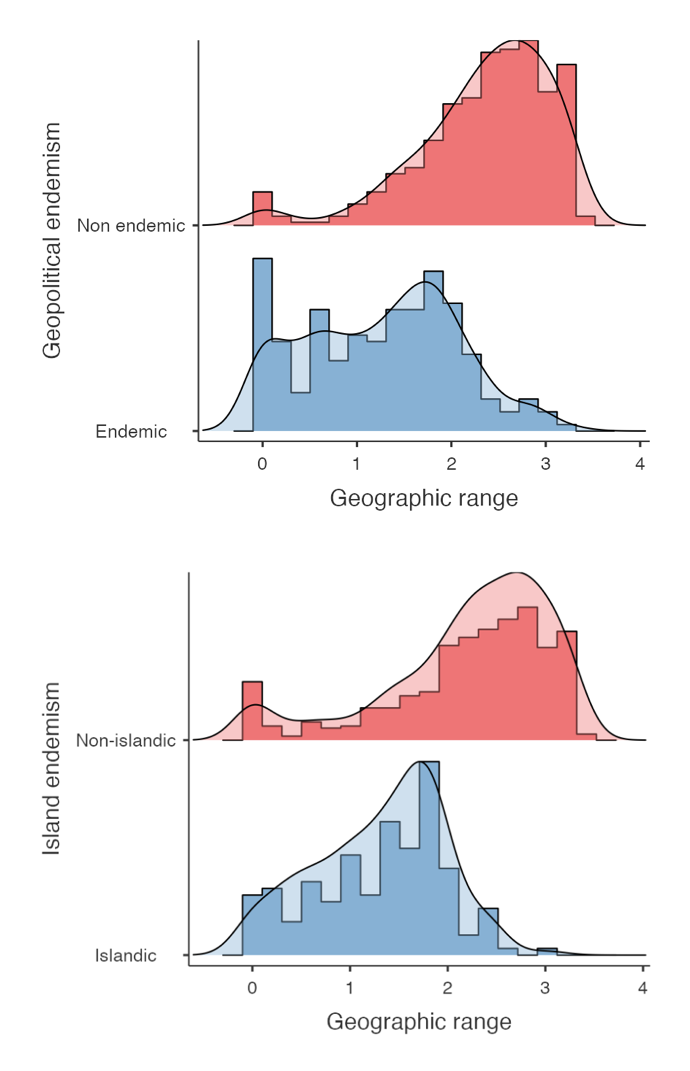


**Supplementary Figure 4.**  Relationship of geographical range to island endemism and geopolitical endemism showing the relatedness of both variables.
