# Supplementary material for: Developing global vulnerabilities and conservation priorities for cave-dwelling bats
Source: Research Square preprint supplement (doi:10.21203/rs.3.rs-492875/v1), 2021-05-13
Supplement: Supplementary file 4 [file 43d7feddf922aa02f7b89162.docx]

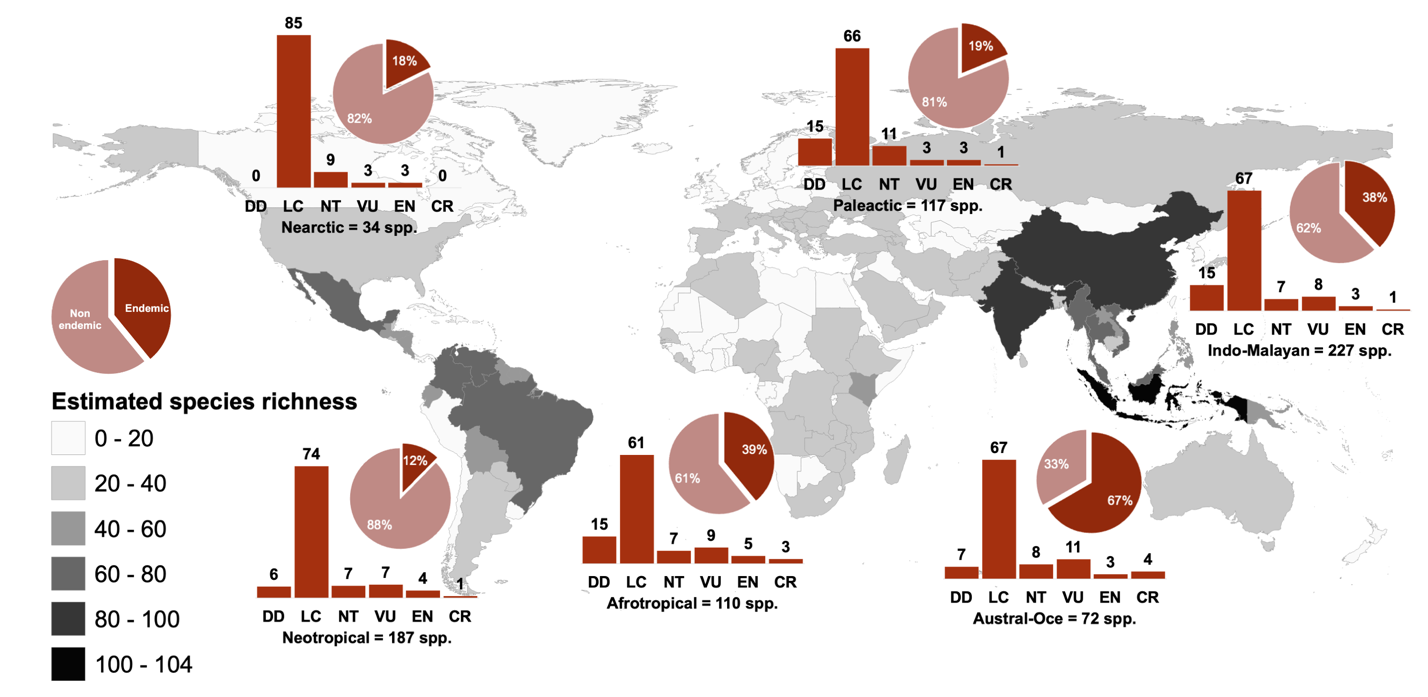


Supplementary Figure 1. IUCN-based taxonomic distribution of estimated species richness per country, and proportion of endemic (in pie graph) and conservation status (in bar graph) of global cave dwelling bats compared by biogeographical realm. Complete details per species are supplemented in Supplementary Data 1 and country species richness are supplemented in Supplementary Data 2.
