# Supplementary material for: Developing global vulnerabilities and conservation priorities for cave-dwelling bats
Source: Research Square preprint supplement (doi:10.21203/rs.3.rs-492875/v1), 2021-05-13
Supplement: Supplementary file 5 [file 53f60ccd81419ed5c85f03c3.docx]

**Supplementary Table 5.** Distribution (cave count) of BCVI in broad-scale and fine-scale across Biogeographical realm and climatic regions

**Supplementary Data 5A.** Number of caves based on broad-scale BCVI across Biogeographical realm.

|  | | | | | | | | | | | | | | | |
| --- | --- | --- | --- | --- | --- | --- | --- | --- | --- | --- | --- | --- | --- | --- | --- |
|  | | **Biogeographical realm** | | | | | | | | | | | |  | |
| **BCVI** | | **Afrotropical** | | **Austral-Oceania** | | **Indomalayan** | | **Nearctic** | | **Neotropical** | | **Palearctic** | | **Total** | |
| 1A |  | 1 |  | 1 |  | 3 |  | 5 |  | 5 |  | 1 |  | 16 |  |
| 1B |  | 1 |  | 0 |  | 0 |  | 0 |  | 3 |  | 0 |  | 4 |  |
| 2A |  | 8 |  | 0 |  | 6 |  | 3 |  | 17 |  | 2 |  | 36 |  |
| 3A |  | 8 |  | 0 |  | 33 |  | 6 |  | 101 |  | 13 |  | 161 |  |
| 3B |  | 0 |  | 1 |  | 2 |  | 0 |  | 2 |  | 3 |  | 8 |  |
| 4A |  | 80 |  | 22 |  | 519 |  | 53 |  | 320 |  | 617 |  | 1611 |  |
| 4B |  | 7 |  | 4 |  | 11 |  | 43 |  | 13 |  | 15 |  | 93 |  |
| 4C |  | 1 |  | 0 |  | 0 |  | 0 |  | 0 |  | 0 |  | 1 |  |
| Total |  | 106 |  | 28 |  | 574 |  | 110 |  | 461 |  | 651 |  | 1930 |  |
|  | | | | | | | | | | | | | | | |

**Supplementary Data 5B.** Number of caves based on broad-scale BCVI across climatic region.

|  | | | | | | | | | | | |
| --- | --- | --- | --- | --- | --- | --- | --- | --- | --- | --- | --- |
|  | | **Climate classification** | | | | | | | |  | |
| **BCVI** | | **Desert and xeric** | | **Mediterranean** | | **Temperate** | | **Tropical** | | **Total** | |
| 1A |  | 1 |  | 0 |  | 7 |  | 8 |  | 16 |  |
| 1B |  | 0 |  | 0 |  | 0 |  | 4 |  | 4 |  |
| 2A |  | 2 |  | 0 |  | 5 |  | 29 |  | 36 |  |
| 3A |  | 3 |  | 0 |  | 19 |  | 139 |  | 161 |  |
| 3B |  | 0 |  | 0 |  | 2 |  | 6 |  | 8 |  |
| 4A |  | 39 |  | 224 |  | 504 |  | 844 |  | 1611 |  |
| 4B |  | 1 |  | 0 |  | 55 |  | 37 |  | 93 |  |
| 4C |  | 0 |  | 0 |  | 0 |  | 1 |  | 1 |  |
| Total |  | 46 |  | 224 |  | 592 |  | 1068 |  | 1930 |  |
|  | | | | | | | | | | | |

**Supplementary Data 5C.** Number of caves based on fine-scale BCVI across Biogeographical realm.

|  | | | | | | | | | | | | | | | |
| --- | --- | --- | --- | --- | --- | --- | --- | --- | --- | --- | --- | --- | --- | --- | --- |
|  | | **Biogeographical realm** | | | | | | | | | | | |  | |
| **BCVI** | | **Afrotropical** | | **Austral-Oceania** | | **Indomalayan** | | **Nearctic** | | **Neotropical** | | **Palearctic** | | **Total** | |
| 1A |  | 7 |  | 0 |  | 56 |  | 21 |  | 52 |  | 52 |  | 188 |  |
| 1B |  | 20 |  | 3 |  | 62 |  | 7 |  | 73 |  | 55 |  | 220 |  |
| 1C |  | 8 |  | 1 |  | 16 |  | 0 |  | 26 |  | 11 |  | 62 |  |
| 1D |  | 0 |  | 0 |  | 6 |  | 1 |  | 9 |  | 5 |  | 21 |  |
| 2A |  | 6 |  | 1 |  | 33 |  | 2 |  | 27 |  | 55 |  | 124 |  |
| 2B |  | 9 |  | 0 |  | 32 |  | 2 |  | 41 |  | 30 |  | 114 |  |
| 2C |  | 2 |  | 0 |  | 12 |  | 4 |  | 9 |  | 7 |  | 34 |  |
| 2D |  | 0 |  | 0 |  | 0 |  | 2 |  | 1 |  | 0 |  | 3 |  |
| 3A |  | 4 |  | 5 |  | 78 |  | 14 |  | 42 |  | 87 |  | 230 |  |
| 3B |  | 15 |  | 3 |  | 71 |  | 9 |  | 65 |  | 63 |  | 226 |  |
| 3C |  | 3 |  | 2 |  | 16 |  | 23 |  | 13 |  | 21 |  | 78 |  |
| 3D |  | 0 |  | 0 |  | 0 |  | 1 |  | 2 |  | 0 |  | 3 |  |
| 4A |  | 17 |  | 11 |  | 89 |  | 11 |  | 33 |  | 159 |  | 320 |  |
| 4B |  | 12 |  | 2 |  | 86 |  | 6 |  | 48 |  | 82 |  | 236 |  |
| 4C |  | 3 |  | 0 |  | 17 |  | 7 |  | 15 |  | 23 |  | 65 |  |
| 4D |  | 0 |  | 0 |  | 0 |  | 0 |  | 5 |  | 1 |  | 6 |  |
| Total |  | 106 |  | 28 |  | 574 |  | 110 |  | 461 |  | 651 |  | 1930 |  |
|  | | | | | | | | | | | | | | | |

**Supplementary Data 5D.** Number of caves based on fine-scale BCVI across climatic region.

|  | | | | | | | | | | | |
| --- | --- | --- | --- | --- | --- | --- | --- | --- | --- | --- | --- |
|  | | **Climate classification** | | | | | | | |  | |
| **BCVI** | | **Desert and xeric** | | **Mediterranean** | | **Temperate** | | **Tropical** | | **Total** | |
| 1A |  | 8 |  | 29 |  | 46 |  | 105 |  | 188 |  |
| 1B |  | 6 |  | 24 |  | 46 |  | 144 |  | 220 |  |
| 1C |  | 4 |  | 1 |  | 12 |  | 45 |  | 62 |  |
| 1D |  | 0 |  | 0 |  | 3 |  | 18 |  | 21 |  |
| 2A |  | 1 |  | 24 |  | 42 |  | 57 |  | 124 |  |
| 2B |  | 3 |  | 7 |  | 23 |  | 81 |  | 114 |  |
| 2C |  | 0 |  | 0 |  | 16 |  | 18 |  | 34 |  |
| 2D |  | 0 |  | 0 |  | 2 |  | 1 |  | 3 |  |
| 3A |  | 1 |  | 46 |  | 63 |  | 120 |  | 230 |  |
| 3B |  | 5 |  | 16 |  | 64 |  | 141 |  | 226 |  |
| 3C |  | 0 |  | 0 |  | 47 |  | 31 |  | 78 |  |
| 3D |  | 0 |  | 0 |  | 1 |  | 2 |  | 3 |  |
| 4A |  | 11 |  | 62 |  | 120 |  | 127 |  | 320 |  |
| 4B |  | 5 |  | 15 |  | 76 |  | 140 |  | 236 |  |
| 4C |  | 1 |  | 0 |  | 31 |  | 33 |  | 65 |  |
| 4D |  | 1 |  | 0 |  | 0 |  | 5 |  | 6 |  |
| Total |  | 46 |  | 224 |  | 592 |  | 1068 |  | 1930 |  |
|  | | | | | | | | | | | |
