# Supplementary material for: Developing global vulnerabilities and conservation priorities for cave-dwelling bats
Source: Research Square preprint supplement (doi:10.21203/rs.3.rs-492875/v1), 2021-05-13
Supplement: Supplementary file 8 [file 93e6829af4e8a67d11066037.docx]

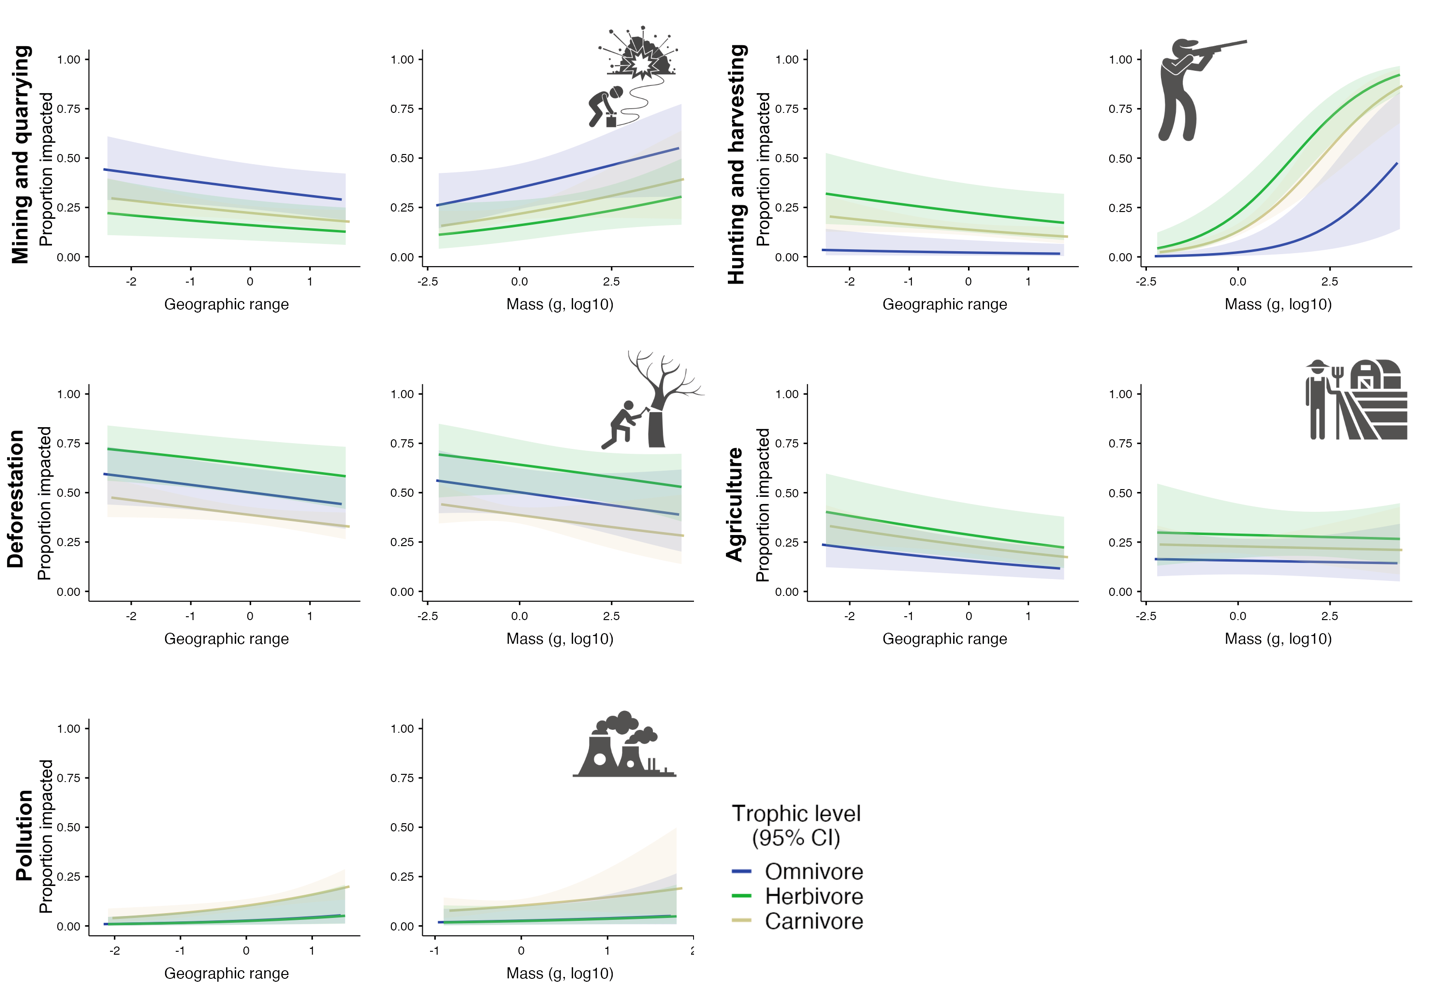


**Supplementary Figure 3.** Effects of geographic range, adult body mass, trophic group and island endemism on species risks to key threatening process. Complete results of the models are supplemented in Supplementary Table 4.
