# Supplementary material for: Developing global vulnerabilities and conservation priorities for cave-dwelling bats
Source: Research Square preprint supplement (doi:10.21203/rs.3.rs-492875/v1), 2021-05-13
Supplement: Supplementary file 9 [file a86da35c9d88a4b6a67aea56.docx]

**Table 2.** Summary of Binomial Generalised Linear Mixed (GLMs) explaining species extinction risk of (A) global species, and in between suborders (B) Yinpterochiroptera, and (C) Yangochiroptera.

| A. Global species |  |  |  |  |
| --- | --- | --- | --- | --- |
| Explanatory variables | **Estimate** | **SE** | **z** | **p** |
| (Intercept) | -1.94 | 0.27 | -7.07 | **< .001** |
| Geographical variables |  |  |  |  |
| Geographic range (log 10) | -1.94 | 0.18 | -10.68 | **< .001** |
| Non-islandic - Islandic | 1 | 0.3 | 3.38 | **< .001** |
| Non Endemic - Endemic | -0.69 | 0.28 | -2.48 | **0.013** |
| Habitat breadth (%) | -1.34 | 1.16 | -1.16 | 0.246 |
| Forest dependency (yes) | 0.05 | 0.34 | 0.15 | 0.878 |
| Biotic variables |  |  |  |  |
| Mass (g, log 10) | 0.02 | 0.36 | 0.05 | 0.960 |
| Generation length (log 10) | -1.65 | 6.56 | -0.25 | 0.801 |
| Trophic levels (herbivore) | 0.09 | 0.52 | 0.18 | 0.856 |
| Trophic levels (omnivores) | -0.14 | 0.41 | -0.33 | 0.739 |
| Threat variables |  |  |  |  |
| Direct threats | 2.22 | 0.83 | 2.66 | **0.008** |
| Indirect threats | -0.88 | 0.66 | -1.34 | 0.181 |
| Natural threats | 1.57 | 1.44 | 1.09 | 0.276 |
|  |  |  |  |  |
| B. Yinpterochiroptera |  |  |  |  |
| Explanatory variables | **Estimate** | **SE** | **z** | **p** |
| (Intercept) | -5.53 | 485.13 | -0.01 | 0.991 |
| Geographical variables |  |  |  |  |
| Geographic range (log 10) | -2.34 | 0.35 | -6.72 | **< .001** |
| Non-islandic - Islandic | 1 | 0.56 | 1.79 | 0.073 |
| Non Endemic - Endemic | -1.19 | 0.54 | -2.2 | **0.028** |
| Habitat breadth (%) | -3.09 | 2.48 | -1.25 | 0.213 |
| Forest dependency (yes) | 0.52 | 0.67 | 0.76 | 0.444 |
| Biotic variables |  |  |  |  |
| Mass (g, log 10) | -0.27 | 0.65 | -0.41 | 0.680 |
| Generation length (log 10) | -15.2 | 16.75 | -0.91 | 0.364 |
| Trophic levels (herbivore) | 0.24 | 0.77 | 0.31 | 0.760 |
| Trophic levels (omnivores) | -11.26 | 1455.4 | -0.01 | 0.994 |
| Threat variables |  |  |  |  |
| Direct threats | 2.84 | 1.4 | 2.02 | **0.043** |
| Indirect threats | -1.36 | 1.3 | -1.05 | 0.293 |
| Natural threats | -0.37 | 2.64 | -0.14 | 0.887 |
|  |  |  |  |  |
| C. Yangochiroptera |  |  |  |  |
| Explanatory variables | **Estimate** | **SE** | **z** | **p** |
| (Intercept) | -2.03 | 0.44 | -4.61 | **< .001** |
| Geographic variables |  |  |  |  |
| Geographic range (log 10) | -2.02 | 0.25 | -8.19 | **< .001** |
| Non-islandic - Islandic | 1.17 | 0.38 | 3.06 | **0.002** |
| Non Endemic - Endemic | -0.43 | 0.34 | -1.27 | 0.204 |
| Habitat breadth (%) | -0.7 | 1.32 | -0.53 | 0.595 |
| Forest dependency (yes) | -0.22 | 0.42 | -0.52 | 0.605 |
| Biotic variables |  |  |  |  |
| Mass (g, log 10) | 0.51 | 0.5 | 1.03 | 0.302 |
| Generation length (log 10) | 6.98 | 8.24 | 0.85 | 0.397 |
| Trophic levels (herbivore) | 0.61 | 1.07 | 0.57 | 0.567 |
| Trophic levels (omnivores) | -0.58 | 0.45 | -1.31 | 0.191 |
| Threat variables |  |  |  |  |
| Direct threats | 2.5 | 1.16 | 2.16 | **0.031** |
| Indirect threats | -0.55 | 0.79 | -0.69 | 0.487 |
| Natural threats | 2.42 | 1.67 | 1.45 | 0.147 |
