# Supplementary material for: Developing global vulnerabilities and conservation priorities for cave-dwelling bats
Source: Research Square preprint supplement (doi:10.21203/rs.3.rs-492875/v1), 2021-05-13
Supplement: Supplementary file 12 [file 6fb43ca7cd1b8c414149aad8.docx]

**Supplementary Table 4.** Summary statistics of Generalised Linear Models (GLM) predicting the independent effects of species traits: geographical range, adult body mass, and trophic levels on the vulnerability of species to top threatening process in global scale. Significant predictors were in bold.

1. **Mining and quarrying**

| Explanatory variables | Effect | Estimate | SE | z | p |
| --- | --- | --- | --- | --- | --- |
| (Intercept) | (Intercept) | -0.63 | 0.26 | -2.4 | 0.016 |
| Geographic range | Geographic range | -0.17 | 0.09 | -1.84 | 0.066 |
| Mass (g, log10) | Mass (g, log10) | 0.19 | 0.11 | 1.72 | 0.086 |
| Trophic level1 | **Herbivore - Omnivore** | **-1.03** | **0.45** | **-2.28** | **0.023** |
| Trophic level2 | **Carnivore - Omnivore** | **-0.64** | **0.28** | **-2.23** | **0.026** |

1. **Hunting and harvesting**

| **Explanatory variables** | **Effect** | **Estimate** | **SE** | **z** | **p** |
| --- | --- | --- | --- | --- | --- |
| (Intercept) | (Intercept) | -2.3 | 0.29 | -8.08 | < .001 |
| Geographic range | Geographic range | -0.2 | 0.11 | -1.81 | 0.07 |
| **Mass (g, log10)** | **Mass (g, log10)** | **0.85** | **0.13** | **6.45** | **< .001** |
| **Trophic level1** | **Herbivore - Omnivore** | **2.57** | **0.79** | **3.25** | **0.001** |
| **Trophic level2** | **Carnivore - Omnivore** | **1.96** | **0.74** | **2.65** | **0.008** |

1. **Agricultural conversion**

| **Explanatory variables** | **Effect** | **Estimate** | **SE** | **z** | **p** |
| --- | --- | --- | --- | --- | --- |
| (Intercept) | (Intercept) | -1.27 | 0.17 | -7.59 | < .001 |
| **Geographic range** | **Geographic range** | **-0.21** | **0.09** | **-2.4** | **0.017** |
| Mass (g, log10) | Mass (g, log10) | -0.02 | 0.11 | -0.22 | 0.829 |
| Trophic level1 | Herbivore - Omnivore | 0.77 | 0.48 | 1.6 | 0.109 |
| Trophic level2 | Carnivore - Omnivore | 0.46 | 0.36 | 1.28 | 0.201 |

1. **Deforestation**

| **Explanatory variables** | **Effect** | **Estimate** | **SE** | **z** | **p** |
| --- | --- | --- | --- | --- | --- |
| (Intercept) | (Intercept) | 0.04 | 0.14 | 0.31 | 0.756 |
| **Geographic range** | **Geographic range** | **-0.15** | **0.08** | **-1.96** | **0.050** |
| Mass (g, log10) | Mass (g, log10) | -0.11 | 0.1 | -1.1 | 0.273 |
| Trophic level1 | Herbivore - Omnivore | 0.57 | 0.39 | 1.45 | 0.148 |
| Trophic level2 | Carnivore - Omnivore | -0.48 | 0.27 | -1.81 | 0.070 |

1. **Pollution**

| **Explanatory variables** | **Effect** | **Estimate** | **SE** | **z** | **p** |
| --- | --- | --- | --- | --- | --- |
| (Intercept) | (Intercept) | -3.14 | 0.36 | -8.74 | < .001 |
| **Geographic range** | **Geographic range** | **0.5** | **0.17** | **2.92** | **0.003** |
| Mass (g, log10) | Mass (g, log10) | 0.38 | 0.39 | 0.99 | 0.321 |
| Trophic level1 | Herbivore - Omnivore | -0.05 | 1.04 | -0.05 | 0.964 |
| **Trophic level2** | **Carnivore - Omnivore** | **1.48** | **0.74** | **2.02** | **0.044** |

1. **Tourism activities**

| **Explanatory variables** | **Effect** | **Estimate** | **SE** | **z** | **p** |
| --- | --- | --- | --- | --- | --- |
| (Intercept) | (Intercept) | -0.74 | 0.14 | -5.09 | < .001 |
| Geographic range | Geographic range | -0.06 | 0.09 | -0.68 | 0.496 |
| Mass (g, log10) | Mass (g, log10) | 0.03 | 0.25 | 0.14 | 0.888 |
| Trophic level1 | Herbivore - Omnivore | 0.38 | 0.41 | 0.92 | 0.359 |
| Trophic level2 | Carnivore - Omnivore | 0.28 | 0.3 | 0.95 | 0.341 |

1. **Urbanisation**

| **Explanatory variables** | **Effect** | **Estimate** | **SE** | **z** | **p** |
| --- | --- | --- | --- | --- | --- |
| (Intercept) | (Intercept) | -2.12 | 0.22 | -9.46 | < .001 |
| Geographic range | Geographic range | 0 | 0.14 | -0.02 | 0.988 |
| Mass (g, log10) | Mass (g, log10) | -0.26 | 0.38 | -0.7 | 0.486 |
| Trophic level1 | Herbivore - Omnivore | 0.62 | 0.65 | 0.94 | 0.346 |
| Trophic level2 | Carnivore - Omnivore | 0.41 | 0.49 | 0.83 | 0.407 |
