# Supplementary material for: Developing global vulnerabilities and conservation priorities for cave-dwelling bats
Source: Research Square preprint supplement (doi:10.21203/rs.3.rs-492875/v1), 2021-05-13
Supplement: Supplementary file 13 [file 7112158d0707756cb56d69e8.xlsx]

## Sheet: Sheet1
Country	Species richness	Rank_species	Species-Area	Number of endemic species	Rank_endemism	% Endemism	Number of threatened species	Rank_threatened	% Threatened	Cement Production (Thousand metric tons)	Rank_cement	Cement production (TTM *1000)	Forest cover (%)	Rank_forest	GDP per Capita	Rank_gdp	Country Area (Sq. km)
Indonesia	104	1	0.0574088	21	2	20.1923	18	1	17.3077	51000	12	51	49.8604	48	1.11919e+12	17	181157
China	98	2	0.0105066	7	6	7.14286	10	2	10.2041	2210000	1	2210	22.3539	121	1.43429e+13	3	932743
India	82	3	0.0275798	10	5	12.1951	9	3	10.9756	270000	2	270	23.8331	117	2.87514e+12	6	297319
Thailand	75	4	0.146803	3	11	4	9	3	12	41047	14	41.047	32.1576	100	5.4365e+11	23	51089
Mexico	72	5	0.0377222	3	11	4.16667	8	5	11.1111	36184	15	36.184	33.9249	92	1.25829e+12	16	190869
Colombia	71	6	0.0683547	12	4	16.9014	6	7	8.4507	10925	32	10.925	52.7039	41	3.23803e+11	39	103870
Malaysia	71	6	0.216101	0	39	0	7	6	9.85915	21726	19	21.726	67.5976	18	3.64702e+11	36	32855
Brazil	70	8	0.0082748	7	6	10	6	7	8.57143	68787	5	68.787	58.9311	29	1.83976e+12	10	845942
Myanmar	66	9	0.100373	6	8	9.09091	6	7	9.09091	600	117	0.6	43.6311	59	7.60859e+10	70	65755
Viet Nam	65	10	0.199699	1	19	1.53846	6	7	9.23077	55531	8	55.531	48.0601	51	2.61921e+11	45	32549
Venezuela	62	11	0.0702908	1	19	1.6129	6	7	9.67742	7700	39	7.7	52.7392	40	-9999	173	88205
Ecuador	58	12	0.209507	18	3	31.0345	5	12	8.62069	5700	48	5.7	50.206	46	107435665000	60	27684
Philippines	58	12	0.19452	23	1	39.6552	5	12	8.62069	18907	22	18.907	27.7694	111	3.76796e+11	33	29817
Lao People's Democratic Republic	55	14	0.238302	3	11	5.45455	5	12	9.09091	400	124	0.4	82.1082	8	1.81738e+10	114	23080
Guyana	53	15	0.269241	1	19	1.88679	5	12	9.43396	-9999	152	-9.999	83.9014	7	4.28044e+09	148	19685
Bolivia	49	16	0.0451871	0	39	0	5	12	10.2041	2714	68	2.714	50.2862	45	4.08953e+10	91	108438
Guatemala	47	17	0.433459	1	19	2.12766	4	17	8.51064	2900	67	2.9	32.695	98	7.67104e+10	69	10843
Congo, The Democratic Republic Of The	46	18	0.900901	0	39	0	4	17	8.69565	377	125	0.377	65.3546	20	1.08206e+10	136	5106
Papua New Guinea	44	19	0.0971603	5	9	11.3636	3	19	6.81818	-9999	152	-9.999	74.0984	10	2.49696e+10	103	45286
French Polynesia	43	20	0.487805	2	15	4.65116	3	19	6.97674	60	150	0.06	42.3497	66	-9999	173	8815
Honduras	43	20	0.384306	1	19	2.32558	3	19	6.97674	1700	86	1.7	39.9678	72	2.50954e+10	102	11189
Suriname	43	20	0.275641	1	19	2.32558	3	19	6.97674	114	144	0.114	98.2577	1	3.98525e+09	149	15600
Nicaragua	42	23	0.345964	1	19	2.38095	3	19	7.14286	700	114	0.7	25.8767	112	1.25209e+10	132	12140
Kenya	41	24	0.0720385	0	39	0	3	19	7.31707	4640	57	4.64	7.81811	157	9.55031e+10	64	56914
Tanzania, United Republic Of	40	25	0.0452699	0	39	0	3	19	7.5	2581	70	2.581	51.5782	42	6.31771e+10	75	88359
Cambodia	37	26	0.209608	0	39	0	3	19	8.10811	980	108	0.98	52.8529	39	2.70894e+10	100	17652
Oman	37	26	0.119548	0	39	0	3	19	8.10811	5200	52	5.2	0.00646204	194	7.69831e+10	68	30950
Russian Federation	37	26	0.00225872	0	39	0	3	19	8.10811	61700	7	61.7	49.7586	49	1.69988e+12	12	1638094
Czech Republic	35	29	0.0154386	0	39	0	3	19	8.57143	3350	63	3.35	34.5636	88	2.46489e+11	47	226705
El Salvador	35	29	1.68919	0	39	0	3	19	8.57143	1400	94	1.4	12.5772	142	27022640000	101	2072
Iran, Islamic Republic Of	35	29	0.021391	0	39	0	3	19	8.57143	70000	4	70	6.56449	163	-9999	173	163620
Belize	34	32	1.49057	0	39	0	3	19	8.82353	-9999	152	-9.999	59.6791	28	1879613600	157	2281
Australia	33	33	0.00429559	0	39	0	3	19	9.09091	8600	37	8.6	16.2583	132	1.39268e+12	15	768230
Nepal	33	33	0.230769	0	39	0	3	19	9.09091	300	130	0.3	25.3645	114	3.06414e+10	99	14300
Paraguay	33	33	0.0830607	0	39	0	3	19	9.09091	800	112	0.8	37.7488	77	3.81453e+10	95	39730
Sudan	33	33	0.0138889	0	39	0	3	19	9.09091	3477	62	3.477	-9999	196	1.89023e+10	112	237600
Argentina	32	37	0.011693	0	39	0	3	19	9.375	10716	33	10.716	9.79841	152	4.49663e+11	26	273669
Ethiopia	32	37	0	0	39	0	3	19	9.375	3000	64	3	12.5396	143	9.61077e+10	63	100000
Afghanistan	31	39	0.0475395	2	15	6.45161	2	39	6.45161	37	151	0.037	2.06782	175	1.91014e+10	111	65209
Turkey	31	39	0.0402791	2	15	6.45161	2	39	6.45161	63879	6	63.879	15.3547	133	7.54412e+11	20	76963
United States	31	39	0.00338466	1	19	3.22581	2	39	6.45161	74934	3	74.934	33.9298	91	2.13744e+13	2	915896
Bangladesh	30	42	0.230468	1	19	3.33333	2	39	6.66667	15000	29	15	10.958	148	3.02571e+11	41	13017
Pakistan	30	42	0.0389166	1	19	3.33333	2	39	6.66667	33000	16	33	1.85373	177	2.78222e+11	43	77088
Trinidad and Tobago	30	42	5.84795	1	19	3.33333	2	39	6.66667	654	115	0.654	46.0234	56	2.41002e+10	106	513
Zimbabwe	30	42	0.0775494	1	19	3.33333	2	39	6.66667	1000	104	1	35.5425	84	21440758800	109	38685
Mozambique	29	46	0.0369856	0	39	0	2	39	6.89655	1184	101	1.184	47.9839	52	1.49342e+10	121	78409
Italy	28	47	0.0952025	0	39	0	2	39	7.14286	33000	16	33	31.7903	102	2.00124e+12	9	29411
Madagascar	28	47	0.048148	0	39	0	2	39	7.14286	150	138	0.15	21.4111	123	1.40839e+10	125	58154
Nigeria	28	47	0.0307432	0	39	0	2	39	7.14286	16400	25	16.4	7.22839	161	4.4812e+11	27	91077
North America	28	47	107.692	0	39	0	2	39	7.14286	-9999	152	-9.999	36.0394	81	2.31178e+13	1	26
Zambia	28	47	0.0376653	0	39	0	2	39	7.14286	1200	99	1.2	65.1992	21	2.30647e+10	108	74339
Georgia	27	52	0.388545	0	39	0	2	39	7.40741	860	110	0.86	40.6159	70	1.77432e+10	115	6949
Greece	27	52	0.209465	0	39	0	2	39	7.40741	7500	40	7.5	31.685	103	2.09853e+11	51	12890
Morocco	27	52	0.0604974	0	39	0	2	39	7.40741	16500	24	16.5	12.6014	141	1.18725e+11	59	44630
Serbia	27	52	#DIV/0!	0	39	0	2	39	7.40741	1831	84	1.831	31.1159	106	5.14092e+10	87	0
South Africa	27	52	0.0222319	0	39	0	2	39	7.40741	11560	31	11.56	7.61774	159	3.51432e+11	37	121447
Uganda	27	52	0.136986	0	39	0	2	39	7.40741	1600	88	1.6	9.68382	153	3.43872e+10	96	19710
Angola	26	58	0.0208551	0	39	0	2	39	7.69231	1600	88	1.6	46.3072	54	9.46354e+10	65	124670
Côte D'ivoire	26	58	0.46495	0	39	0	2	39	7.69231	78	147	0.078	32.7063	97	5.87922e+10	79	5592
France	26	58	0.0472641	0	39	0	2	39	7.69231	19500	20	19.5	31.2333	105	2.71552e+12	8	55010
Spain	26	58	0.0521	0	39	0	2	39	7.69231	15939	26	15.939	36.9362	78	1.39412e+12	14	49904
Azerbaijan	25	62	0.302663	0	39	0	2	39	8	1966	81	1.966	14.0997	138	4.80476e+10	88	8260
Bulgaria	25	62	0.225978	0	39	0	2	39	8	2000	76	2	35.374	85	6.79272e+10	72	11063
Cameroon	25	62	0.0537172	0	39	0	2	39	8	900	109	0.9	39.3391	73	3.87605e+10	93	46540
Israel	25	62	1.15154	0	39	0	2	39	8	5500	49	5.5	7.72643	158	3.95099e+11	31	2171
Armenia	24	66	0.851064	0	39	0	2	39	8.33333	438	123	0.438	11.6684	145	1.36728e+10	127	2820
Malawi	24	66	0.255102	0	39	0	2	39	8.33333	180	136	0.18	33.1884	94	7.6667e+09	141	9408
Romania	24	66	0.104407	0	39	0	2	39	8.33333	7500	40	7.5	30.1208	109	2.50077e+11	46	22987
Slovenia	24	66	1.19166	0	39	0	2	39	8.33333	1000	104	1	61.97	24	5.37422e+10	84	2014
Albania	23	70	0.839416	0	39	0	2	39	8.69565	2000	76	2	28.1219	110	1.52781e+10	120	2740
Algeria	23	70	0.00965681	0	39	0	2	39	8.69565	19000	21	19	0.824439	184	1.69988e+11	55	238174
Brunei Darussalam	23	70	4.36433	0	39	0	2	39	8.69565	300	130	0.3	72.1063	13	1.34694e+10	129	527
Hungary	23	70	0.249729	0	39	0	2	39	8.69565	2000	76	2	22.9051	119	1.60967e+11	56	9210
Liberia	23	70	0.238787	0	39	0	2	39	8.69565	109	145	0.109	43.0752	61	3070518100	153	9632
Montenegro	23	70	#DIV/0!	0	39	0	2	39	8.69565	-9999	152	-9.999	61.487	26	5.49474e+09	145	0
Bosnia and Herzegovina	22	76	0	0	39	0	2	39	9.09091	846	111	0.846	42.6758	64	2.00478e+10	110	5120
Gibraltar	22	76	#DIV/0!	1	19	4.54545	1	78	4.54545	-9999	152	-9.999	-9999	196	-9999	173	0
Slovakia	22	76	0.457571	1	19	4.54545	1	78	4.54545	2915	66	2.915	40.3536	71	1.05422e+11	61	4808
Sri Lanka	22	76	0.340399	1	19	4.54545	1	78	4.54545	2400	74	2.4	32.9038	96	8.40088e+10	67	6463
Switzerland	22	76	0.55	3	11	13.6364	1	78	4.54545	4467	58	4.467	31.8301	101	7.03082e+11	21	4000
Syrian Arab Republic	22	76	0	4	10	18.1818	1	78	4.54545	4000	61	4	2.67386	173	-9999	173	18378
Yemen	22	76	0	0	39	0	2	39	9.09091	2000	76	2	1.03983	182	-9999	173	52797
Austria	21	83	0.2547	1	19	4.7619	1	78	4.7619	4455	59	4.455	46.9057	53	4.46315e+11	28	8245
Dominica	21	83	28	1	19	4.7619	1	78	4.7619	-9999	152	-9.999	57.4133	31	5.96033e+08	168	75
Japan	21	83	0.0576132	1	19	4.7619	1	78	4.7619	54737	10	54.737	68.4562	17	5.08177e+12	4	36450
Saudi Arabia	21	83	0.00976885	0	39	0	1	78	4.7619	53000	11	53	0.454484	187	7.92967e+11	19	214969
Senegal	21	83	0.109074	1	19	4.7619	1	78	4.7619	4689	56	4.689	42.7622	63	2.35781e+10	107	19253
Sierra Leone	21	83	0.293214	1	19	4.7619	1	78	4.7619	335	128	0.335	43.0535	62	3.94147e+09	150	7162
Ukraine	21	83	0.0362475	0	39	0	1	78	4.7619	9801	35	9.801	16.708	131	1.53781e+11	57	57935
Portugal	20	90	0.218579	0	39	0	1	78	5	6000	47	6	34.6114	87	2.37686e+11	48	9150
Rwanda	20	90	0.810701	0	39	0	1	78	5	100	146	0.1	19.7325	124	1.01225e+10	137	2467
Somalia	20	90	0.0318806	0	39	0	1	78	5	-9999	152	-9.999	10.0204	151	-9999	173	62734
Togo	20	90	0.367715	0	39	0	1	78	5	1605	87	1.605	3.09248	171	5.45998e+09	146	5439
Croatia	19	94	0.17301	0	39	0	1	78	5.26316	2500	71	2.5	34.3531	89	6.04156e+10	78	10982
Cyprus	19	94	0.245891	0	39	0	1	78	5.26316	1300	96	1.3	18.6872	129	2.45646e+10	104	7727
Germany	19	94	0.0544491	0	39	0	1	78	5.26316	32432	18	32.432	32.6912	99	3.84563e+12	5	34895
Jordan	19	94	0.215322	0	39	0	1	78	5.26316	4900	54	4.9	1.09822	180	4.37437e+10	90	8824
Andorra	18	98	#DIV/0!	0	39	0	1	78	5.55556	-9999	152	-9.999	34.0426	90	3.15406e+09	152	0
Burkina Faso	18	98	0.0657895	0	39	0	1	78	5.55556	600	117	0.6	19.3355	126	1.57458e+10	119	27360
Eritrea	18	98	0.178218	0	39	0	1	78	5.55556	230	134	0.23	14.9069	135	-9999	173	10100
Kazakhstan	18	98	0.00666741	0	39	0	1	78	5.55556	6392	46	6.392	1.22569	179	1.80162e+11	54	269970
Poland	18	98	0.0587678	0	39	0	1	78	5.55556	15919	27	15.919	30.8834	108	5.92164e+11	22	30629
Canada	17	103	0.00186947	0	39	0	1	78	5.88235	12465	30	12.465	38.1615	75	1.73643e+12	11	909351
Central African Republic	17	103	0.0272882	0	39	0	1	78	5.88235	-9999	152	-9.999	35.562	83	2.22031e+09	156	62298
Taiwan, Province Of China	17	103	#DIV/0!	0	39	0	1	78	5.88235	15806	28	15.806	-9999	196	-9999	173	0
Cuba	16	106	1.7316	0	39	0	1	78	6.25	1833	83	1.833	31.2786	104	-9999	173	924
Dominican Republic	16	106	0.330715	0	39	0	1	78	6.25	4130	60	4.13	41.7346	67	8.89413e+10	66	4838
Egypt	16	106	0.0160731	0	39	0	1	78	6.25	55200	9	55.2	0.0739364	192	3.03175e+11	40	99545
Haiti	16	106	0.580552	0	39	0	1	78	6.25	300	130	0.3	3.49057	168	8.49898e+09	138	2756
Iraq	16	106	0.0365823	0	39	0	1	78	6.25	10000	34	10	1.90036	176	2.34094e+11	49	43737
Korea, Democratic People's Republic Of	16	106	0.132879	0	39	0	1	78	6.25	6400	45	6.4	40.7275	69	-9999	173	12041
Korea, Republic Of	16	106	0.162058	0	39	0	1	78	6.25	47087	13	47.087	63.3548	23	1.64238e+12	13	9873
Lebanon	16	106	1.56403	0	39	0	1	78	6.25	5500	49	5.5	13.4291	139	5.3367e+10	85	1023
Luxembourg	16	106	#DIV/0!	0	39	0	1	78	6.25	1217	98	1.217	35.679	82	7.11049e+10	71	0
San Marino	16	106	#DIV/0!	0	39	0	1	78	6.25	-9999	152	-9.999	-9999	196	-9999	173	0
Djibouti	15	116	0.64711	0	39	0	1	78	6.66667	-9999	152	-9.999	0.241588	189	3.31872e+09	151	2318
Libya	15	116	0.00852496	0	39	0	1	78	6.66667	2000	76	2	0.123328	191	5.20763e+10	86	175954
Monaco	15	116	#DIV/0!	0	39	0	1	78	6.66667	-9999	152	-9.999	-9999	196	-9999	173	0
Tunisia	15	116	0.0965499	0	39	0	1	78	6.66667	7241	42	7.241	6.76622	162	3.87977e+10	92	15536
Belarus	14	120	0.0674764	0	39	0	1	78	7.14286	4906	53	4.906	42.6301	65	6.30805e+10	76	20748
Benin	14	120	0.126559	0	39	0	1	78	7.14286	1390	95	1.39	37.7882	76	1.43907e+10	123	11062
Botswana	14	120	0.0247031	0	39	0	1	78	7.14286	-9999	152	-9.999	18.9469	128	1.83405e+10	113	56673
Burundi	14	120	0.545171	0	39	0	1	78	7.14286	71	149	0.071	10.9268	149	3.01233e+09	154	2568
Chad	14	120	0.0111182	0	39	0	1	78	7.14286	-9999	152	-9.999	3.77097	167	1.1315e+10	134	125920
Jamaica	14	120	1.29271	0	39	0	1	78	7.14286	760	113	0.76	30.916	107	1.64581e+10	118	1083
Mali	14	120	0	0	39	0	1	78	7.14286	-9999	152	-9.999	3.79941	166	1.75101e+10	116	122019
Mongolia	14	120	0.00893712	0	39	0	1	78	7.14286	349	127	0.349	8.0174	156	1.38529e+10	126	156650
Namibia	14	120	0	0	39	0	1	78	7.14286	501	121	0.501	8.31396	155	1.23665e+10	133	82329
Peru	14	120	0.0109375	0	39	0	1	78	7.14286	9000	36	9	57.6605	30	2.26848e+11	50	128000
Sweden	14	120	0.0341189	0	39	0	1	78	7.14286	2500	71	2.5	68.9229	16	5.30833e+11	24	41033
Belgium	13	131	#DIV/0!	0	39	0	0	134	0	7000	43	7	22.5839	120	5.29607e+11	25	0
Gambia	13	131	0	0	39	0	1	78	0	-9999	152	-9.999	48.3794	50	1.76382e+09	158	1000
Liechtenstein	13	131	0	0	39	0	1	78	0	-9999	152	-9.999	43.125	60	-9999	173	16
Lithuania	13	131	0.207403	2	15	15.3846	0	134	0	1000	104	1	34.8329	86	5.42193e+10	82	6268
Turkmenistan	13	131	0.0276637	0	39	0	0	134	0	1900	82	1.9	8.78216	154	-9999	173	46993
United Kingdom	13	131	0.0537346	0	39	0	0	134	0	8500	38	8.5	13.0658	140	2.82711e+12	7	24193
Uruguay	13	131	0	0	39	0	1	78	7.69231	620	116	0.62	10.6716	150	5.60459e+10	81	17502
Denmark	12	138	0.282819	0	39	0	0	134	0	1798	85	1.798	14.6992	136	3.48078e+11	38	4243
Equatorial Guinea	12	138	0.427807	0	39	0	0	134	0	-9999	152	-9.999	55.4866	35	1.10268e+10	135	2805
Latvia	12	138	0.193392	0	39	0	0	134	0	1100	102	1.1	53.9788	37	3.41172e+10	97	6205
Netherlands	12	138	0.354191	0	39	0	0	134	0	2500	71	2.5	11.1784	146	9.0907e+11	18	3388
Solomon	12	138	0.428725	0	39	0	0	134	0	-9999	152	-9.999	77.8635	9	1.42507e+09	162	2799
Gabon	11	143	0.0426903	0	39	0	0	134	0	220	135	0.22	90.0376	3	1.6658e+10	117	25767
Timor-Leste	11	143	0.739744	0	39	0	0	134	0	-9999	152	-9.999	45.38	58	1673540300	161	1487
Uzbekistan	11	143	0.025858	0	39	0	0	134	0	6800	44	6.8	7.54297	160	5.79213e+10	80	42540
Hong Kong	10	146	#DIV/0!	0	39	0	0	134	0	1600	88	1.6	-9999	196	3.6603e+11	35	0
Kyrgyzstan	10	146	0.0521376	0	39	0	0	134	0	1050	103	1.05	3.27946	170	8.45462e+09	139	19180
Mauritania	10	146	0.009754	0	39	0	0	134	0	570	119	0.57	0.214417	190	7.59375e+09	142	102522
Tajikistan	10	146	0.071449	0	39	0	0	134	0	232	133	0.232	2.9714	172	8.11663e+09	140	13996
Estonia	9	150	0.212314	0	39	0	0	134	0	450	122	0.45	51.3366	44	3.13869e+10	98	4239
Puerto Rico	9	150	1.01466	0	39	0	0	134	0	-9999	152	-9.999	56.2864	32	104988600000	62	887
Ireland	8	152	0.116127	0	39	0	0	134	0	2600	69	2.6	11.0277	147	3.88699e+11	32	6889
Malta	8	152	25	0	39	0	0	134	0	-9999	152	-9.999	1.09375	181	1.47862e+10	122	32
Singapore	8	152	11.9403	0	39	0	0	134	0	-9999	152	-9.999	23.0606	118	3.72063e+11	34	67
Bahamas, The	7	155	0.699301	0	39	0	0	134	0	-9999	152	-9.999	51.4486	43	12827000000	131	1001
Bhutan	7	155	0.148936	0	39	0	0	134	0	521	120	0.521	72.4845	12	-9999	173	4700
Chile	7	155	0.00934829	0	39	0	0	134	0	4722	55	4.722	24.2569	115	2.82318e+11	42	74880
Congo	7	155	0.0204978	0	39	0	0	134	0	150	138	0.15	67.1651	19	4.73196e+10	89	34150
Barbados	6	159	13.9535	0	39	0	0	134	0	176	137	0.176	14.6512	137	5209000000	147	43
Cayman Islands	5	160	19.2308	0	39	0	0	134	0	-9999	152	-9.999	52.9167	38	-9999	173	26
Lesotho	5	160	0.164745	0	39	0	0	134	0	-9999	152	-9.999	1.6469	178	2.46007e+09	155	3035
Martinique	5	160	4.71698	0	39	0	0	134	0	150	138	0.15	-9999	196	-9999	173	106
New Zealand	5	160	0.0186574	0	39	0	0	134	0	1200	99	1.2	38.5561	74	2.06929e+11	52	26799
United Arab Emirates	5	160	0.0598086	0	39	0	0	134	0	17000	23	17	4.55731	165	4.21142e+11	29	8360
Vanuatu	5	160	0.410172	0	39	0	0	134	0	-9999	152	-9.999	36.0952	80	9.17059e+08	166	1219
Antigua and Barbuda	4	166	9.09091	0	39	0	0	134	0	-9999	152	-9.999	22.2727	122	1.72776e+09	159	44
Comoros	4	166	1.79372	0	39	0	0	134	0	-9999	152	-9.999	19.6668	125	1.18573e+09	165	223
Fiji	4	166	0.218938	0	39	0	0	134	0	120	143	0.12	55.942	33	5.53555e+09	144	1827
Finland	4	166	0.0131324	0	39	0	0	134	0	1500	91	1.5	73.1072	11	2.68761e+11	44	30459
Ghana	4	166	0.0175793	0	39	0	0	134	0	3000	64	3	41.1594	68	6.69836e+10	73	22754
Anguilla	3	171	#DIV/0!	0	39	0	0	134	0	-9999	152	-9.999	-9999	196	-9999	173	0
Aruba	3	171	#DIV/0!	0	39	0	0	134	0	-9999	152	-9.999	2.33333	174	-9999	173	0
Grenada	3	171	8.82353	0	39	0	0	134	0	-9999	152	-9.999	49.9706	47	1.22817e+09	164	34
Sao Tome and Principe	3	171	3.125	0	39	0	0	134	0	-9999	152	-9.999	55.8333	34	4.29017e+08	169	96
Guinea	2	175	0.00813935	0	39	0	0	134	0	317	129	0.317	25.7529	113	1.35903e+10	128	24572
Kuwait	2	175	0.112233	0	39	0	0	134	0	2250	75	2.25	0.35073	188	1.34761e+11	58	1782
New Caledonia	2	175	0.109409	0	39	0	0	134	0	124	142	0.124	45.8972	57	-9999	173	1828
Seychelles	2	175	4.34783	0	39	0	0	134	0	-9999	152	-9.999	88.413	4	1.69884e+09	160	46
American Samoa	1	179	5	0	39	0	0	134	0	-9999	152	-9.999	87.5	6	-9999	173	20
Bermuda	1	179	0	0	39	0	0	134	0	-9999	152	-9.999	18.5185	130	-9999	173	5
Mauritius	1	179	0.492611	0	39	0	0	134	0	-9999	152	-9.999	19.0345	127	1.41804e+10	124	203
Micronesia, Fed. Sts.	1	179	1.42857	0	39	0	0	134	0	-9999	152	-9.999	91.8571	2	-9999	173	70
Naura	1	179	0	0	39	0	0	134	0	-9999	152	-9.999	-9999	196	1.18223e+08	171	2
Palau	1	179	#DIV/0!	0	39	0	0	134	0	-9999	152	-9.999	87.6087	5	-9999	173	0
Panama	1	179	0	0	39	0	0	134	0	1000	104	1	61.8859	25	66800800000	74	7443
Réunion	1	179	0	0	39	0	0	134	0	350	126	0.35	-9999	196	-9999	173	250
Samoa	1	179	0.353357	0	39	0	0	134	0	-9999	152	-9.999	60.424	27	8.50655e+08	167	283
Tonga	1	179	1.38889	0	39	0	0	134	0	-9999	152	-9.999	12.5	144	-9999	173	72
Bahrain	0	189	0	0	39	0	0	134	0	1300	96	1.3	0.784062	185	3.85741e+10	94	71
British Virgin Islands	0	189	0	0	39	0	0	134	0	-9999	152	-9.999	24.1333	116	-9999	173	15
Costa Rica	0	189	0	0	39	0	0	134	0	1500	91	1.5	54.5672	36	6.17739e+10	77	31800
Faroe Islands	0	189	0	0	39	0	0	134	0	-9999	152	-9.999	0.0573066	193	-9999	173	0
Greenland	0	189	0	0	39	0	0	134	0	-9999	152	-9.999	0.000535997	195	-9999	173	41045
Guam	0	189	0	0	39	0	0	134	0	-9999	152	-9.999	46.2963	55	-9999	173	55
Guinea-Bissau	0	189	0	0	39	0	0	134	0	-9999	152	-9.999	69.7724	15	1.34039e+09	163	2812
Iceland	0	189	0	0	39	0	0	134	0	140	141	0.14	0.503741	186	2.4188e+10	105	10025
Isle of Man	0	189	0	0	39	#DIV/0!	0	134	0	-9999	152	-9.999	6.07018	164	-9999	173	0
Kiribati	0	189	0	0	39	0	0	134	0	-9999	152	-9.999	15	134	1.94647e+08	170	73
Macao SAR, China	0	189	0	0	39	0	0	134	0	-9999	152	-9.999	-9999	196	5.38591e+10	83	0
Maldives	0	189	0	0	39	0	0	134	0	-9999	152	-9.999	3.33333	169	5.72925e+09	143	30
Marshall Island	0	189	0	0	39	0	0	134	0	-9999	152	-9.999	70.2222	14	-9999	173	0
Niger	0	189	0	0	39	0	0	134	0	73	148	0.073	0.891766	183	1.29281e+10	130	126670
Northern Mariana Islands	0	189	0	0	39	#DIV/0!	0	134	0	-9999	152	-9.999	63.7826	22	-9999	173	0
Norway	0	189	0	0	39	0	0	134	0	1500	91	1.5	33.1779	95	4.03336e+11	30	30625
Qatar	0	189	0	0	39	0	0	134	0	5500	49	5.5	-9999	196	1.83466e+11	53	1100
Turks and Caicos Islands	0	189	0	0	39	0	0	134	0	-9999	152	-9.999	36.2105	79	-9999	173	0
Tuvalu	0	189	0	0	39	0	0	134	0	-9999	152	-9.999	33.3333	93	4.72715e+07	172	3
