# Supplementary material for: Developing global vulnerabilities and conservation priorities for cave-dwelling bats
Source: Research Square preprint supplement (doi:10.21203/rs.3.rs-492875/v1), 2021-05-13
Supplement: Supplementary file 14 [file c531970dbbb7b3bb0f0e962d.docx]

**Supplementary Table 1.** Extinction proportions of cave-dwelling bats across different taxonomic and ecological dimensions

| Global species | 679 | 90 | 15 | 13 | 25 |
| --- | --- | --- | --- | --- | --- |
| Suborders | **No S** | **No T** | ***p̂* extinction** | ***p̂ extinction_lower*** | ***p̂ extinction_higher*** |
| Yinpterochiroptera | 222 | 47 | 24 | 21 | 32 |
| Yangochiroptera | 457 | 43 | 11 | 9 | 22 |
|  |  |  |  |  |  |
| Family | **No S** | **No T** | ***p̂* extinction** | ***p̂ extinction_lower*** | ***p̂ extinction_higher*** |
| Cistugidae | 1 | 0 | 0 | 0 | 0 |
| Craseonycteridae | 1 | 1 | 100 | 100 | 100 |
| Emballonuridae | 39 | 5 | 15 | 13 | 26 |
| Furipteridae | 2 | 1 | 50 | 50 | 50 |
| Hipposideridae | 81 | 18 | 25 | 22 | 35 |
| Megadermatidae | 4 | 1 | 25 | 25 | 25 |
| Miniopteridae | 25 | 1 | 6 | 4 | 36 |
| Molossidae | 41 | 5 | 14 | 12 | 24 |
| Mormoopidae | 12 | 1 | 8 | 8 | 8 |
| Mystacinidae | 2 | 2 | 100 | 100 | 100 |
| Myzopodidae | 2 | 0 | 0 | 0 | 0 |
| Natalidae | 11 | 2 | 20 | 18 | 27 |
| Noctolionidae | 2 | 0 | 0 | 0 | 0 |
| Nycteridae | 8 | 1 | 13 | 13 | 13 |
| Phyllostomidae | 96 | 8 | 9 | 8 | 16 |
| Pteropodidae | 48 | 12 | 27 | 25 | 31 |
| Rhinolophidae | 84 | 15 | 21 | 18 | 32 |
| Rhinopomatidae | 4 | 0 | 0 | 0 | 0 |
| Thyropteridae | 1 | 0 | 0 | 0 | 0 |
| Vespertilionidae | 215 | 17 | 9 | 8 | 23 |
|  |  |  |  |  |  |
| Population trend | **No S** | **No T** | ***p̂* extinction** | ***p̂ extinction_lower*** | ***p̂ extinction_higher*** |
| Decreasing | 150 | 71 | 49 | 47 | 50 |
| Increasing | 6 | 0 | 0 | 0 | 0 |
| Stable | 161 | 2 | 1 | 1 | 1 |
| Unknown | 362 | 17 | 6 | 5 | 27 |
|  |  |  |  |  |  |
| Trophic levels | **No S** | **No T** | ***p̂* extinction** | ***p̂ extinction_lower*** | ***p̂ extinction_higher*** |
| Omnivore | 66 | 7 | 11 | 11 | 18 |
| Carnivore | 553 | 70 | 15 | 13 | 26 |
| Herbivore | 60 | 13 | 23 | 22 | 27 |
|  |  |  |  |  |  |
| Biogeographical realm | **No S** | **No T** | ***p̂* extinction** | ***p̂ extinction_lower*** | ***p̂ extinction_higher*** |
| Afrotropic | 110 | 18 | 19 | 16 | 32 |
| Indomalayan | 227 | 26 | 13 | 11 | 26 |
| Nearctic | 34 | 2 | 6 | 6 | 6 |
| Neotropic | 187 | 24 | 14 | 13 | 19 |
| Oceania | 72 | 13 | 19 | 18 | 25 |
| Palearctic | 117 | 9 | 9 | 8 | 23 |
|  |  |  |  |  |  |
| Geopolitical endemism | **No S** | **No T** | ***p̂* extinction** | ***p̂ extinction_lower*** | ***p̂ extinction_higher*** |
| Endemic | 220 | 63 | 36 | 29 | 50 |
| Non endemic | 459 | 27 | 6 | 6 | 14 |
|  |  |  |  |  |  |
| Island endemism | **No S** | **No T** | ***p̂* extinction** | ***p̂ extinction_lower*** | ***p̂ extinction_higher*** |
| Non-islandic | 520 | 47 | 10 | 9 | 21 |
| Islandic | 159 | 56 | 40 | 35 | 48 |
