# Supplementary material for: Developing global vulnerabilities and conservation priorities for cave-dwelling bats
Source: Research Square preprint supplement (doi:10.21203/rs.3.rs-492875/v1), 2021-05-13
Supplement: Supplementary file 15 [file db5ce9014ae376488b48113d.xlsx]

## Sheet: Sheet1
Count default	Family	Suborder	Species	Forest	Savanna	Dessert	Urban	Cave	In land wetlands	Population Status	Conservation Status	Extinction risk	Geopolitical Endemism	Island.Endemicity	Island.Endemicity 2	Biogeographic realm	Biogeographic realm_0	Biogeographic realm_1	Feeding groups	Number of cells current range	Number of cells natural range	Generation Length	Mass (g)	Mining & quarrying	Sacred activities	Tourism and caving activities	Guano extraction	Vandalism	Nest harvesting	Bushmeat hunting & medicine	Intensional killings/Misguided killings	Gating	Scientific research	Direct (sum)	Agriculture	Urbanisation	Deforestation	Pollution	Road Kills	Indirect (sum)	Diseases and parasitism	Invasive species, predation	Fire	Drought	Heatwaves	Extreme cold	Storm	Storm	Natural (sum)
1	Pteropodidae	Yinpterochiroptera	Aethalops aequalis	1				1		Unknown	Least Concern	Least Concern	Non Endemic	Land bridges	Islandic	Indomalayan	Indomalayan	Indomalayan	Frugivore	29	29	1553.79	11.6														1			1
1	Furipteridae	Yangochiroptera	Amorphochilus schnablii	1						Stable	Vulnerable	Vulnerable	Non Endemic	Mainland	Non-islandic	Neotropic	Neotropic	Neotropic	Insectivore	63	63	2070.53	3.3		1	1				1				3	1					1			1						1
1	Phyllostomidae	Yangochiroptera	Anoura caudifer	1	1			1		Unknown	Least Concern	Least Concern	Non Endemic	Mainland	Non-islandic	Neotropic	Neotropic	Neotropic	Frugivore	775	775	2064.28	10.1								1
1	Phyllostomidae	Yangochiroptera	Anoura cultrata	1				1		Decreasing	Least Concern	Least Concern	Non Endemic	Mainland	Non-islandic	Neotropic	Neotropic	Neotropic	Omnivore	163	163	2064.28	16.9												1	1	1			3
1	Phyllostomidae	Yangochiroptera	Anoura fistulata	1						Unknown	Data Deficient	Data Deficient	Endemic	Mainland	Non-islandic	Neotropic	Neotropic	Neotropic	Omnivore	13	13	2064.28	13											0
1	Phyllostomidae	Yangochiroptera	Anoura geoffroyi	1	1			1		Stable	Least Concern	Least Concern	Non Endemic	Mainland	Non-islandic	Neotropic	Neotropic	Neotropic	Frugivore	1105	1105	2064.28	14.6	1		1		1						3			1			1
1	Phyllostomidae	Yangochiroptera	Anoura latidens	1				1		Stable	Least Concern	Least Concern	Non Endemic	Mainland	Non-islandic	Neotropic	Neotropic	Neotropic	Omnivore	153	153	2064.28	14.7	1													1			1
1	Phyllostomidae	Yangochiroptera	Anoura luismanueli	1				1		Stable	Least Concern	Least Concern	Non Endemic	Mainland	Non-islandic	Neotropic	Neotropic	Neotropic	Omnivore	25	25	2064.28	8.5	1													1			1									1
1	Phyllostomidae	Yangochiroptera	Anoura peruana	1				1		Stable	Least Concern	Least Concern	Non Endemic	Mainland	Non-islandic	Neotropic	Neotropic	Neotropic	Omnivore	1105	1105	2064.28	14.6	1		1
1	Vespertilionidae	Yangochiroptera	Antrozous pallidus	1				1		Stable	Least Concern	Least Concern	Non Endemic	Mainland	Non-islandic	Nearctic	Nearctic	Nearctic	Insectivore	572	572	1524.06	20.8			1		1						2			1	1		2
1	Pteropodidae	Yinpterochiroptera	Aproteles bulmerae	1			1	1		Decreasing	Critically Endangered	Critically Endangered	Endemic	Land bridges	Islandic	Oceania	Oceania	Oceania	Frugivore	2	7	2349.86	600							1	1			2		1							1	1					2
1	Vespertilionidae	Yangochiroptera	Arielulus aureocollaris	1						Unknown	Least Concern	Least Concern	Non Endemic	Mainland	Non-islandic	Palearctic	Palearctic	Palearctic	Insectivore	6	6	2051.67	14.5
1	Vespertilionidae	Yangochiroptera	Arielulus torquatus	1						Stable	Least Concern	Least Concern	Endemic	Land bridges	Islandic	Palearctic	Palearctic	Palearctic	Insectivore	10	10	2051.67	6.3												1	1	1			3							1
1	Phyllostomidae	Yangochiroptera	Artibeus amplus	1						Unknown	Least Concern	Least Concern	Non Endemic	Mainland	Non-islandic	Neotropic	Neotropic	Neotropic	Omnivore	227	227	1920.48	60	1	1		1							3			1			1
1	Phyllostomidae	Yangochiroptera	Artibeus fimbriatus	1	1			1		Stable	Least Concern	Least Concern	Non Endemic	Mainland	Non-islandic	Neotropic	Neotropic	Neotropic	Frugivore	217	217	1920.48	63.9														1			1
1	Phyllostomidae	Yangochiroptera	Artibeus fraterculus	1						Decreasing	Least Concern	Least Concern	Non Endemic	Mainland	Non-islandic	Neotropic	Neotropic	Neotropic	Omnivore	60	60	1920.48	39.5
1	Phyllostomidae	Yangochiroptera	Artibeus hirsutus	1				1		Stable	Least Concern	Least Concern	Endemic	Mainland	Non-islandic	Neotropic	Neotropic	Neotropic	Omnivore	54	54	1920.48	38.7												1		1			2
1	Phyllostomidae	Yangochiroptera	Artibeus jamaicensis	1				1		Stable	Least Concern	Least Concern	Non Endemic	Mainland	Non-islandic	Neotropic	Neotropic	Neotropic	Frugivore	302	302	1920.48	42.2
1	Phyllostomidae	Yangochiroptera	Artibeus lituratus	1	1			1	1	Stable	Least Concern	Least Concern	Non Endemic	Mainland	Non-islandic	Neotropic	Neotropic	Neotropic	Frugivore	1723	1723	1920.48	60.5														1			1
1	Phyllostomidae	Yangochiroptera	Artibeus obscurus	1	1			1		Stable	Least Concern	Least Concern	Non Endemic	Mainland	Non-islandic	Neotropic	Neotropic	Neotropic	Frugivore	1301	1301	1920.48	35.2
1	Phyllostomidae	Yangochiroptera	Artibeus planirostris	1	1			1		Stable	Least Concern	Least Concern	Non Endemic	Mainland	Non-islandic	Neotropic	Neotropic	Neotropic	Frugivore	989	989	1920.48	47														1			1
1	Hipposideridae	Yinpterochiroptera	Asellia arabica		1					Unknown	Data Deficient	Data Deficient	Non Endemic	Mainland	Non-islandic	Palearctic	Palearctic	Palearctic	Insectivore	1	1	1834.23	11.9			1								1				1		1
1	Hipposideridae	Yinpterochiroptera	Asellia italosomalica		1	1		1		Unknown	Data Deficient	Data Deficient	Non Endemic	Mainland	Non-islandic	Palearctic	Palearctic	Palearctic	Insectivore	1	1	1834.23	10			1								1				1		1
1	Hipposideridae	Yinpterochiroptera	Asellia patrizii					1		Unknown	Least Concern	Least Concern	Non Endemic	Mainland	Non-islandic	Palearctic to Afrotropic	Palearctic	Cosmopolitan	Insectivore	42	42	1834.23	6			1								1		1				1
1	Hipposideridae	Yinpterochiroptera	Asellia patrizii					1		Unknown	Least Concern	Least Concern	Non Endemic	Mainland	Non-islandic	Palearctic to Afrotropic	Afrotropic	Cosmopolitan	Insectivore	42	42	1834.23	6			1								1		1				1
1	Hipposideridae	Yinpterochiroptera	Asellia tridens	1	1	1		1		Stable	Least Concern	Least Concern	Non Endemic	Mainland	Non-islandic	Palearctic to Afrotropic	Palearctic	Cosmopolitan	Insectivore	2040	2040	1834.23	11.9			1								1		1		1		2
1	Hipposideridae	Yinpterochiroptera	Asellia tridens	1	1	1		1		Stable	Least Concern	Least Concern	Non Endemic	Mainland	Non-islandic	Palearctic to Afrotropic	Afrotropic	Cosmopolitan	Insectivore	2040	2040	1834.23	11.9			1								1		1		1		2
1	Hipposideridae	Yinpterochiroptera	Aselliscus dongbacana	1				1		Unknown	Data Deficient	Data Deficient	Endemic	Mainland	Non-islandic	Indomalayan	Indomalayan	Indomalayan	Insectivore	1	1	1834.23	4.5
1	Hipposideridae	Yinpterochiroptera	Aselliscus stoliczkanus					1		Unknown	Least Concern	Least Concern	Non Endemic	Mainland	Non-islandic	Indomalayan	Indomalayan	Indomalayan	Insectivore	191	191	1834.23	4.9	1		1								2
1	Hipposideridae	Yinpterochiroptera	Aselliscus tricuspidatus	1				1		Stable	Least Concern	Least Concern	Non Endemic	Land bridges	Islandic	Indomalayan	Indomalayan	Indomalayan	Insectivore	134	134	1834.23	4.1			1				1				2
1	Vespertilionidae	Yangochiroptera	Austronomus australis	1	1	1				Decreasing	Least Concern	Least Concern	Endemic	Mainland	Non-islandic	Oceania	Oceania	Oceania	Insectivore	738	738	1427.91	31.8																								1	1	2
1	Emballonuridae	Yangochiroptera	Balantiopteryx infusca	1				1		Decreasing	Vulnerable	Vulnerable	Non Endemic	Mainland	Non-islandic	Neotropic	Neotropic	Neotropic	Insectivore	5	5	894.25	4.4												1		1			2
1	Emballonuridae	Yangochiroptera	Balantiopteryx io	1				1		Decreasing	Vulnerable	Vulnerable	Non Endemic	Mainland	Non-islandic	Neotropic	Neotropic	Neotropic	Insectivore	36	36	894.25	4.3	1		1		1						3
1	Emballonuridae	Yangochiroptera	Balantiopteryx plicata	1						Unknown	Least Concern	Least Concern	Non Endemic	Mainland	Non-islandic	Neotropic	Neotropic	Neotropic	Insectivore	147	147	894.25	6.4	1		1		1						3			1			1			1						1
1	Pteropodidae	Yinpterochiroptera	Balionycteris maculata	1						Stable	Least Concern	Least Concern	Non Endemic	Mainland	Non-islandic	Indomalayan	Indomalayan	Indomalayan	Frugivore	108	108	1553.79	13.4												1		1			2			1						1
1	Vespertilionidae	Yangochiroptera	Barbastella barbastellus	1				1		Decreasing	Near Threatened	Near Threatened	Non Endemic	Mainland	Non-islandic	Palearctic	Palearctic	Palearctic	Insectivore	600	605	1825	8	1		1								2		1	1		1	3
1	Vespertilionidae	Yangochiroptera	Barbastella beijingensis	1				1		Unknown	Data Deficient	Data Deficient	Endemic	Mainland	Non-islandic	Palearctic	Palearctic	Palearctic	Insectivore	1	1	1825	13.9
1	Vespertilionidae	Yangochiroptera	Barbastella leucomelas	1				1		Unknown	Least Concern	Least Concern	Non Endemic	Mainland	Non-islandic	Palearctic	Palearctic	Palearctic	Insectivore	587	587	1825	15.1	1		1								2		1	1			2
1	Pteropodidae	Yinpterochiroptera	Boneia bidens	1				1		Decreasing	Vulnerable	Vulnerable	Endemic	Small-ranging islands	Islandic	Indomalayan	Indomalayan	Indomalayan	Frugivore	47	47	1776.62	171							1				1	1		1			2
1	Phyllostomidae	Yangochiroptera	Brachyphylla cavernarum	1				1		Unknown	Least Concern	Least Concern	Non Endemic	Small-ranging islands	Islandic	Neotropic	Neotropic	Neotropic	Omnivore	21	21	2064.28	46.2
1	Phyllostomidae	Yangochiroptera	Brachyphylla nana					1		Stable	Least Concern	Least Concern	Non Endemic	Small-ranging islands	Islandic	Neotropic	Neotropic	Neotropic	Omnivore	60	60	2064.28	35.8			1								1
1	Megadermatidae	Yinpterochiroptera	Cardioderma cor	1	1					Unknown	Least Concern	Least Concern	Non Endemic	Mainland	Non-islandic	Afrotropic	Afrotropic	Afrotropic	Insectivore	307	307	1985.8	27.8		1									1
1	Phyllostomidae	Yangochiroptera	Carollia brevicauda	1	1					Stable	Least Concern	Least Concern	Non Endemic	Mainland	Non-islandic	Neotropic	Neotropic	Neotropic	Omnivore	1276	1276	1847.54	14.4
1	Phyllostomidae	Yangochiroptera	Carollia perspicillata	1	1			1		Stable	Least Concern	Least Concern	Non Endemic	Mainland	Non-islandic	Neotropic	Neotropic	Neotropic	Omnivore	1656	1656	1847.54	18
1	Phyllostomidae	Yangochiroptera	Carollia sowelli	1	1					Stable	Least Concern	Least Concern	Non Endemic	Mainland	Non-islandic	Neotropic	Neotropic	Neotropic	Omnivore	128	128	1847.54	16.5
1	Phyllostomidae	Yangochiroptera	Carollia subrufa	1				1		Stable	Least Concern	Least Concern	Non Endemic	Mainland	Non-islandic	Neotropic	Neotropic	Neotropic	Omnivore	47	47	1847.54	15.6														1			1
1	Molossidae	Yangochiroptera	Chaerephon ansorgei	1	1					Stable	Least Concern	Least Concern	Non Endemic	Mainland	Non-islandic	Afrotropic	Afrotropic	Afrotropic	Insectivore	726	726	1847.54	16.1							1				1
1	Molossidae	Yangochiroptera	Chaerephon atsinanana	1						Increasing	Least Concern	Least Concern	Endemic	Small-ranging islands	Islandic	Afrotropic	Afrotropic	Afrotropic	Insectivore	1053	1053	1427.91	11.3
1	Molossidae	Yangochiroptera	Chaerephon bemmeleni	1	1					Unknown	Least Concern	Least Concern	Non Endemic	Mainland	Non-islandic	Afrotropic	Afrotropic	Afrotropic	Insectivore	111	111	1427.91	19												1		1			2
1	Molossidae	Yangochiroptera	Chaerephon bregullae	1				1		Decreasing	Endangered	Endangered	Endemic	Small-ranging islands	Islandic	Oceania	Oceania	Oceania	Insectivore	8	12	1427.91	19.9			1		1						2
1	Molossidae	Yangochiroptera	Chaerephon gallagheri	1						Unknown	Data Deficient	Data Deficient	Endemic	Mainland	Non-islandic	Afrotropic	Afrotropic	Afrotropic	Insectivore	1	1	1427.91	10.2												1		1			2
1	Molossidae	Yangochiroptera	Chaerephon jobensis	1	1			1		Stable	Least Concern	Least Concern	Non Endemic	Mainland	Non-islandic	Indomalayan to Oceania	Indomalayan	Cosmopolitan	Insectivore	355	355	1427.91	16.9
1	Molossidae	Yangochiroptera	Chaerephon jobensis	1	1			1		Stable	Least Concern	Least Concern	Non Endemic	Mainland	Non-islandic	Indomalayan to Oceania	Oceania	Cosmopolitan	Insectivore	355	355	1427.91	16.9
1	Molossidae	Yangochiroptera	Chaerephon jobimena	1				1		Unknown	Least Concern	Least Concern	Endemic	Small-ranging islands	Islandic	Afrotropic	Afrotropic	Afrotropic	Insectivore	42	42	1427.91	14.3							1				1
1	Molossidae	Yangochiroptera	Chaerephon plicatus	1				1		Stable	Least Concern	Least Concern	Non Endemic	Mainland	Non-islandic	Indomalayan	Indomalayan	Indomalayan	Insectivore	467	467	1427.91	17.1	1		1	1			1	1			5	1		1	1		3							1	1	2
1	Molossidae	Yangochiroptera	Chaerephon solomonis	1				1		Unknown	Least Concern	Least Concern	Endemic	Small-ranging islands	Islandic	Oceania	Oceania	Oceania	Insectivore	6	6	1427.91	12.3
1	Vespertilionidae	Yangochiroptera	Chalinolobus dwyeri	1	1			1		Decreasing	Near Threatened	Near Threatened	Endemic	Mainland	Non-islandic	Oceania	Oceania	Oceania	Insectivore	85	85	2055.24	9	1										1	1	1	1			3		1							1
1	Vespertilionidae	Yangochiroptera	Chalinolobus gouldii	1	1					Stable	Least Concern	Least Concern	Endemic	Mainland	Non-islandic	Oceania	Oceania	Oceania	Insectivore	902	902	2051.67	14.5
1	Vespertilionidae	Yangochiroptera	Chalinolobus morio	1	1			1		Stable	Least Concern	Least Concern	Endemic	Mainland	Non-islandic	Oceania	Oceania	Oceania	Insectivore	372	372	2055.24	8.8
1	Vespertilionidae	Yangochiroptera	Chalinolobus nigrogriseus	1	1					Stable	Least Concern	Least Concern	Endemic	Mainland	Non-islandic	Oceania	Oceania	Oceania	Insectivore	252	252	2055.24	8.8			1								1
1	Vespertilionidae	Yangochiroptera	Chalinolobus tuberculatus	1						Decreasing	Vulnerable	Vulnerable	Endemic	Small-ranging islands	Islandic	Oceania	Oceania	Oceania	Insectivore	46	58	2051.67	8.5			1								1			1			1		1							1
1	Molossidae	Yangochiroptera	Cheiromeles parvidens	1				1		Unknown	Least Concern	Least Concern	Non Endemic	Small-ranging islands	Islandic	Indomalayan	Indomalayan	Indomalayan	Insectivore	136	136	1427.91	114.6							1				1			1			1
1	Molossidae	Yangochiroptera	Cheiromeles torquatus	1				1		Unknown	Least Concern	Least Concern	Non Endemic	Mainland	Non-islandic	Indomalayan	Indomalayan	Indomalayan	Insectivore	237	237	1427.91	163.5	1					1	1	1			4
1	Natalidae	Yangochiroptera	Chilonatalus macer	1						Unknown	Data Deficient	Data Deficient	Endemic	Mainland	Non-islandic	Neotropic	Neotropic	Neotropic	Insectivore	55	55	2070.53	3.5			1											1
1	Natalidae	Yangochiroptera	Chilonatalus micropus	1				1		Decreasing	Near Threatened	Near Threatened	Non Endemic	Small-ranging islands	Islandic	Neotropic	Neotropic	Neotropic	Insectivore	55	55	2070.53	3.5	1		1								2
1	Natalidae	Yangochiroptera	Chilonatalus tumidifrons	1				1		Decreasing	Near Threatened	Near Threatened	Endemic	Small-ranging islands	Islandic	Neotropic	Neotropic	Neotropic	Insectivore	11	11	2070.53	3.3			1	1	1						3											1		1	1	3
1	Phyllostomidae	Yangochiroptera	Chiroderma doriae	1	1			1	1	Unknown	Least Concern	Least Concern	Non Endemic	Mainland	Non-islandic	Neotropic	Neotropic	Neotropic	Frugivore	337	337	2064.28	19.9														1			1
1	Phyllostomidae	Yangochiroptera	Chiroderma trinitatum	1				1		Unknown	Least Concern	Least Concern	Non Endemic	Mainland	Non-islandic	Neotropic	Neotropic	Neotropic	Frugivore	1114	1114	2064.28	13.7														1			1
1	Pteropodidae	Yinpterochiroptera	Chironax melanocephalus	1				1		Unknown	Least Concern	Least Concern	Non Endemic	Mainland	Non-islandic	Indomalayan	Indomalayan	Indomalayan	Frugivore	65	65	1553.79	16.7												1		1			2			1						1
1	Phyllostomidae	Yangochiroptera	Choeronycteris mexicana	1		1		1		Unknown	Near Threatened	Near Threatened	Non Endemic	Mainland	Non-islandic	Neotropic	Neotropic	Neotropic	Omnivore	265	265	2064.28	16.6	1		1								2			1			1
1	Phyllostomidae	Yangochiroptera	Chrotopterus auritus	1	1			1		Stable	Least Concern	Least Concern	Non Endemic	Mainland	Non-islandic	Neotropic	Neotropic	Neotropic	Insectivore	1592	1592	2064.28	77.9
1	Cistugidae	Yangochiroptera	Cistugo seabrae			1				Unknown	Least Concern	Least Concern	Non Endemic	Mainland	Non-islandic	Afrotropic	Afrotropic	Afrotropic	Insectivore	61	61	2051.67	5.4	1		1								2
1	Hipposideridae	Yinpterochiroptera	Cloeotis percivali	1	1			1		Unknown	Least Concern	Least Concern	Non Endemic	Mainland	Non-islandic	Afrotropic	Afrotropic	Afrotropic	Insectivore	89	89	1834.23	4.1			1								1				1		1
1	Hipposideridae	Yinpterochiroptera	Coelops frithii	1				1		Unknown	Least Concern	Least Concern	Non Endemic	Mainland	Non-islandic	Indomalayan	Indomalayan	Indomalayan	Insectivore	413	413	1834.23	7.4														1			1							1	1	2
1	Hipposideridae	Yinpterochiroptera	Coelops robinsoni	1				1		Decreasing	Vulnerable	Vulnerable	Non Endemic	Mainland	Non-islandic	Indomalayan	Indomalayan	Indomalayan	Insectivore	37	37	1834.23	6.5												1		1			2			1						1
1	Emballonuridae	Yangochiroptera	Coleura afra	1	1	1		1		Unknown	Least Concern	Least Concern	Non Endemic	Mainland	Non-islandic	Afrotropic	Afrotropic	Afrotropic	Insectivore	488	488	788.4	10.7			1		1						2
1	Emballonuridae	Yangochiroptera	Coleura kibomalandy	1						Unknown	Data Deficient	Data Deficient	Endemic	Small-ranging islands	Islandic	Afrotropic	Afrotropic	Afrotropic	Insectivore	1	1	788.4	12.5
1	Emballonuridae	Yangochiroptera	Coleura seychellensis	1				1	1	Decreasing	Critically Endangered	Critically Endangered	Endemic	Small-ranging islands	Islandic	Afrotropic	Afrotropic	Afrotropic	Insectivore	1	2	788.4	10.6			1	1	1						3			1			1		1							1
1	Vespertilionidae	Yangochiroptera	Corynorhinus mexicanus	1				1		Decreasing	Near Threatened	Near Threatened	Endemic	Mainland	Non-islandic	Neotropic	Neotropic	Neotropic	Insectivore	97	97	1289.8	7.7			1	1	1						3			1			1
1	Vespertilionidae	Yangochiroptera	Corynorhinus rafinesquii	1				1		Increasing	Least Concern	Least Concern	Endemic	Mainland	Non-islandic	Nearctic	Nearctic	Nearctic	Insectivore	191	191	1289.8	9.1			1		1						2		1		1		2
1	Vespertilionidae	Yangochiroptera	Corynorhinus townsendii	1				1		Stable	Least Concern	Least Concern	Non Endemic	Mainland	Non-islandic	Nearctic to Neotropic	Nearctic	Cosmopolitan	Insectivore	594	594	1289.8	9.9			1		1		1	1			4
1	Vespertilionidae	Yangochiroptera	Corynorhinus townsendii	1				1		Stable	Least Concern	Least Concern	Non Endemic	Mainland	Non-islandic	Nearctic to Neotropic	Neotropic	Cosmopolitan	Insectivore	594	594	1289.8	9.9			1		1		1	1			4
1	Craseonycteridae	Yinpterochiroptera	Craseonycteris thonglongyai	1				1		Decreasing	Vulnerable	Vulnerable	Non Endemic	Mainland	Non-islandic	Indomalayan	Indomalayan	Indomalayan	Insectivore	7	7	2070.53	2.2	1	1	1	1							4			1			1
1	Pteropodidae	Yinpterochiroptera	Cynnopterus sphinx	1			1			Increasing	Least Concern	Least Concern	Non Endemic	Mainland	Non-islandic	Indomalayan	Indomalayan	Indomalayan	Frugivore	923	923	1285.25	43.7
1	Pteropodidae	Yinpterochiroptera	Cynopterus brachyotis							Unknown	Least Concern	Least Concern	Non Endemic	Mainland	Non-islandic	Indomalayan	Indomalayan	Indomalayan	Frugivore	454	454	1287.66	31.2	1		1				1				3	1	1	1			3
1	Pteropodidae	Yinpterochiroptera	Cynopterus horsfieldii	1			1	1		Unknown	Least Concern	Least Concern	Non Endemic	Mainland	Non-islandic	Indomalayan	Indomalayan	Indomalayan	Frugivore	262	262	1286.46	55.1														1			1
1	Phyllostomidae	Yangochiroptera	Dermanura tolteca	1				1		Unknown	Least Concern	Least Concern	Non Endemic	Mainland	Non-islandic	Neotropic	Neotropic	Neotropic	Omnivore	166	166	1920.48	15.4
1	Phyllostomidae	Yangochiroptera	Desmodus rotundus	1	1			1		Stable	Least Concern	Least Concern	Non Endemic	Mainland	Non-islandic	Neotropic	Neotropic	Neotropic	Sanguivore	2106	2106	2779.8	31.2								1			1
1	Phyllostomidae	Yangochiroptera	Diaemus youngi	1	1			1		Unknown	Least Concern	Least Concern	Non Endemic	Mainland	Non-islandic	Neotropic	Neotropic	Neotropic	Sanguivore	1570	1570	2064.28	36.3								1			1
1	Phyllostomidae	Yangochiroptera	Diphylla ecaudata	1	1			1		Stable	Least Concern	Least Concern	Non Endemic	Mainland	Non-islandic	Neotropic	Neotropic	Neotropic	Sanguivore	1056	1056	2064.28	29.3								1			1
1	Pteropodidae	Yinpterochiroptera	Dobsonia anderseni	1			1	1		Stable	Least Concern	Least Concern	Endemic	Small-ranging islands	Islandic	Oceania	Oceania	Oceania	Frugivore	34	34	2100.64	204.1			1	1	1		1				4
1	Pteropodidae	Yinpterochiroptera	Dobsonia beauforti	1			1	1		Unknown	Least Concern	Least Concern	Endemic	Land bridges	Islandic	Indomalayan	Indomalayan	Indomalayan	Frugivore	10	10	2100.64	159
1	Pteropodidae	Yinpterochiroptera	Dobsonia chapmani	1				1		Decreasing	Critically Endangered	Critically Endangered	Endemic	Small-ranging islands	Islandic	Indomalayan	Indomalayan	Indomalayan	Frugivore	3	10	2190	134	1		1	1	1		1				5	1		1			2
1	Pteropodidae	Yinpterochiroptera	Dobsonia crenulata	1				1		Stable	Least Concern	Least Concern	Endemic	Small-ranging islands	Islandic	Indomalayan	Indomalayan	Indomalayan	Frugivore	74	74	2100.64	272	1						1				2
1	Pteropodidae	Yinpterochiroptera	Dobsonia emersa	1			1	1		Decreasing	Vulnerable	Vulnerable	Endemic	Small-ranging islands	Islandic	Indomalayan	Indomalayan	Indomalayan	Frugivore	3	4	2100.64	195.5			1	1			1				3			1			1
1	Pteropodidae	Yinpterochiroptera	Dobsonia exoleta	1				1		Unknown	Least Concern	Least Concern	Endemic	Small-ranging islands	Islandic	Indomalayan	Indomalayan	Indomalayan	Frugivore	56	56	2100.64	249							1				1
1	Pteropodidae	Yinpterochiroptera	Dobsonia inermis	1			1	1		Stable	Least Concern	Least Concern	Endemic	Small-ranging islands	Islandic	Indomalayan	Indomalayan	Indomalayan	Frugivore	32	32	2100.64	149.5			1		1		1	1			4
1	Pteropodidae	Yinpterochiroptera	Dobsonia moluccensis	1				1		Unknown	Data Deficient	Data Deficient	Non Endemic	Small-ranging islands	Islandic	Oceania	Oceania	Oceania	Frugivore	27	27	2011.28	381.4	1						1	1			3			1			1
1	Pteropodidae	Yinpterochiroptera	Dobsonia pannietensis	1				1		Unknown	Near Threatened	Near Threatened	Endemic	Small-ranging islands	Islandic	Oceania	Oceania	Oceania	Frugivore	12	12	2100.64	267.7	1		1		1		1				4			1			1
1	Pteropodidae	Yinpterochiroptera	Dobsonia peronii	1				1		Stable	Least Concern	Least Concern	Endemic	Land bridges	Islandic	Indomalayan	Indomalayan	Indomalayan	Frugivore	45	45	2100.64	216.9							1	1			2
1	Pteropodidae	Yinpterochiroptera	Dobsonia praedatrix	1				1		Unknown	Least Concern	Least Concern	Endemic	Small-ranging islands	Islandic	Oceania	Oceania	Oceania	Frugivore	24	24	2100.64	188.7												1		1
1	Pteropodidae	Yinpterochiroptera	Dobsonia viridis	1			1	1		Stable	Least Concern	Least Concern	Endemic	Small-ranging islands	Islandic	Indomalayan	Indomalayan	Indomalayan	Frugivore	16	16	2100.64	238							1	1			2
1	Pteropodidae	Yinpterochiroptera	Dyacopterus rickarti	1				1		Decreasing	Endangered	Endangered	Endemic	Small-ranging islands	Islandic	Indomalayan	Indomalayan	Indomalayan	Frugivore	105	105	1825	84.2			1				1	1				1		1
1	Pteropodidae	Yinpterochiroptera	Dyacopterus spadiceus	1				1		Decreasing	Near Threatened	Near Threatened	Endemic	Mainland	Non-islandic	Indomalayan	Indomalayan	Indomalayan	Frugivore	105	105	1825	84.2			1				1					1		1						1
1	Pteropodidae	Yinpterochiroptera	Eidolon dupreanum	1				1		Decreasing	Vulnerable	Vulnerable	Endemic	Small-ranging islands	Islandic	Afrotropic	Afrotropic	Afrotropic	Frugivore	74	74	2190	283.8							1	1			2
1	Emballonuridae	Yangochiroptera	Emballonura alecto	1				1		Decreasing	Least Concern	Least Concern	Non Endemic	Land bridges	Islandic	Indomalayan	Indomalayan	Indomalayan	Insectivore	267	267	894.25	5.3	1		1		1						3
1	Emballonuridae	Yangochiroptera	Emballonura beccarii	1				1		Unknown	Least Concern	Least Concern	Endemic	Land bridges	Islandic	Indomalayan to Oceania	Indomalayan	Cosmopolitan	Insectivore	50	50	894.25	4.2	1		1				1				3
1	Emballonuridae	Yangochiroptera	Emballonura beccarii	1				1		Unknown	Least Concern	Least Concern	Endemic	Land bridges	Islandic	Indomalayan to Oceania	Oceania	Cosmopolitan	Insectivore	50	50	895.25	4.2	1		1				1				3
1	Emballonuridae	Yangochiroptera	Emballonura dianae	1				1		Unknown	Least Concern	Least Concern	Endemic	Land bridges	Islandic	Oceania	Oceania	Oceania	Insectivore	44	44	894.25	8							1				1	1		1			2
1	Emballonuridae	Yangochiroptera	Emballonura furax	1				1		Stable	Least Concern	Least Concern	Endemic	Land bridges	Islandic	Indomalayan to Oceania	Indomalayan	Cosmopolitan	Insectivore	24	24	894.25	11.2	1		1		1						3	1		1			2
1	Emballonuridae	Yangochiroptera	Emballonura furax	1				1		Stable	Least Concern	Least Concern	Endemic	Land bridges	Islandic	Indomalayan to Oceania	Oceania	Cosmopolitan	Insectivore	24	24	894.25	11.2	1		1		1						3	1		1			2
1	Emballonuridae	Yangochiroptera	Emballonura monticola	1				1		Decreasing	Least Concern	Least Concern	Non Endemic	Mainland	Non-islandic	Indomalayan	Indomalayan	Indomalayan	Insectivore	328	328	894.25	5.7	1			1	1						3	1	1	1			3
1	Emballonuridae	Yangochiroptera	Emballonura raffrayana	1				1		Unknown	Least Concern	Least Concern	Endemic	Land bridges	Islandic	Indomalayan	Indomalayan	Indomalayan	Insectivore	93	93	894.25	5.6							1				1
1	Emballonuridae	Yangochiroptera	Emballonura semicaudata	1				1		Decreasing	Endangered	Endangered	Endemic	Small-ranging islands	Islandic	Oceania	Oceania	Oceania	Insectivore	21	30	894.25	6.3				1							1	1		1	1		3		1	1						2
1	Emballonuridae	Yangochiroptera	Emballonura serii	1				1		Unknown	Least Concern	Least Concern	Endemic	Land bridges	Islandic	Indomalayan	Indomalayan	Indomalayan	Insectivore	11	11	894.25	8.8
1	Pteropodidae	Yinpterochiroptera	Eonycteris major	1			1	1		Unknown	Data Deficient	Data Deficient	Non Endemic	Land bridges	Islandic	Indomalayan	Indomalayan	Indomalayan	Frugivore	109	109	1584.66	72.8	1						1				2
1	Pteropodidae	Yinpterochiroptera	Eonycteris robusta	1				1		Decreasing	Near Threatened	Near Threatened	Endemic	Small-ranging islands	Islandic	Indomalayan	Indomalayan	Indomalayan	Frugivore	55	55	2190	77.5	1		1	1	1		1				5			1			1
1	Pteropodidae	Yinpterochiroptera	Eonycteris spelaea	1			1	1		Unknown	Least Concern	Least Concern	Non Endemic	Mainland	Non-islandic	Indomalayan	Indomalayan	Indomalayan	Omnivore	662	662	979.323	58.1			1				1				2	1		1			2
1	Vespertilionidae	Yangochiroptera	Eptesicus brasiliensis	1	1			1		Unknown	Least Concern	Least Concern	Non Endemic	Mainland	Non-islandic	Neotropic	Neotropic	Neotropic	Insectivore	1581	1581	2400.94	9.5
1	Vespertilionidae	Yangochiroptera	Eptesicus diminutus	1				1		Unknown	Least Concern	Least Concern	Non Endemic	Mainland	Non-islandic	Neotropic	Neotropic	Neotropic	Insectivore	354	498	2400.94	6
1	Vespertilionidae	Yangochiroptera	Eptesicus furinalis	1				1		Unknown	Least Concern	Least Concern	Non Endemic	Mainland	Non-islandic	Neotropic	Neotropic	Neotropic	Insectivore	1953	1953	2400.94	7.7
1	Vespertilionidae	Yangochiroptera	Eptesicus fuscus	1				1		Unknown	Least Concern	Least Concern	Non Endemic	Mainland	Non-islandic	Nearctic to Neotropic	Nearctic	Cosmopolitan	Insectivore	1641	1651	2400.94	17.5
1	Vespertilionidae	Yangochiroptera	Eptesicus fuscus	1				1		Unknown	Least Concern	Least Concern	Non Endemic	Mainland	Non-islandic	Nearctic to Neotropic	Neotropic	Cosmopolitan	Insectivore	1641	1651	2400.94	17.5
1	Vespertilionidae	Yangochiroptera	Eptesicus gobiensis			1				Unknown	Least Concern	Least Concern	Non Endemic	Mainland	Non-islandic	Palearctic	Palearctic	Palearctic	Insectivore	490	490	2400.94	10												1					1				1					1
1	Vespertilionidae	Yangochiroptera	Eptesicus hottentotus	1	1				1	Unknown	Least Concern	Least Concern	Non Endemic	Mainland	Non-islandic	Afrotropic	Afrotropic	Afrotropic	Insectivore	363	363	2400.94	30
1	Vespertilionidae	Yangochiroptera	Eptesicus innoxius	1						Unknown	Near Threatened	Near Threatened	Non Endemic	Mainland	Non-islandic	Neotropic	Neotropic	Neotropic	Insectivore	38	38	2400.94	8.4												1		1	1		3
1	Vespertilionidae	Yangochiroptera	Eptesicus isabellinus	1						Unknown	Least Concern	Least Concern	Non Endemic	Mainland	Non-islandic	Afrotropic	Afrotropic	Afrotropic	Insectivore	158	158	2400.94	18.3
1	Vespertilionidae	Yangochiroptera	Eptesicus nilssonii	1		1			1	Stable	Least Concern	Least Concern	Non Endemic	Mainland	Non-islandic	Palearctic	Palearctic	Palearctic	Insectivore	1391	1391	2400.94	10.4
1	Vespertilionidae	Yangochiroptera	Eptesicus pachyomus	1				1		Unknown	Least Concern	Least Concern	Non Endemic	Mainland	Non-islandic	Indomalayan to Paleartic	Indomalayan	Cosmopolitan	Insectivore	1773	1773	2400.94	22.9
1	Vespertilionidae	Yangochiroptera	Eptesicus pachyomus	1				1		Unknown	Least Concern	Least Concern	Non Endemic	Mainland	Non-islandic	Indomalayan to Paleartic	Palearctic	Cosmopolitan	Insectivore	1773	1773	2400.94	22.9
1	Vespertilionidae	Yangochiroptera	Eptesicus pachyotis	1						Unknown	Least Concern	Least Concern	Non Endemic	Mainland	Non-islandic	Indomalayan	Indomalayan	Indomalayan	Insectivore	175	175	2400.94	8.3
1	Vespertilionidae	Yangochiroptera	Eptesicus serotinus	1				1		Unknown	Least Concern	Least Concern	Non Endemic	Mainland	Non-islandic	Palearctic	Palearctic	Palearctic	Insectivore	1773	1773	2400.94	22.9								1			1				1		1	1								1
1	Phyllostomidae	Yangochiroptera	Erophylla bombifrons					1		Stable	Least Concern	Least Concern	Non Endemic	Small-ranging islands	Islandic	Neotropic	Neotropic	Neotropic	Omnivore	23	23	2064.28	14.3	1										1													1	1	2
1	Phyllostomidae	Yangochiroptera	Erophylla sezekorni					1		Unknown	Least Concern	Least Concern	Non Endemic	Small-ranging islands	Islandic	Neotropic	Neotropic	Neotropic	Omnivore	49	49	2064.28	15.8	1			1							2
1	Molossidae	Yangochiroptera	Eumops auripendulus	1	1					Unknown	Least Concern	Least Concern	Non Endemic	Mainland	Non-islandic	Neotropic	Neotropic	Neotropic	Insectivore	1684	1684	1427.91	28.5														1			1
1	Molossidae	Yangochiroptera	Eumops bonariensis	1						Unknown	Least Concern	Least Concern	Non Endemic	Mainland	Non-islandic	Neotropic	Neotropic	Neotropic	Insectivore	158	158	1427.91	11.9
1	Molossidae	Yangochiroptera	Eumops perotis	1				1		Decreasing	Least Concern	Least Concern	Non Endemic	Mainland	Non-islandic	Nearctic to Neotropic	Nearctic	Cosmopolitan	Insectivore	1410	1410	1427.91	51.1																					1					1
1	Molossidae	Yangochiroptera	Eumops perotis	1				1		Decreasing	Least Concern	Least Concern	Non Endemic	Mainland	Non-islandic	Nearctic to Neotropic	Neotropic	Cosmopolitan	Insectivore	1410	1410	1427.91	51.1																					1					1
1	Vespertilionidae	Yangochiroptera	Falsistrellus affinis	1						Unknown	Least Concern	Least Concern	Non Endemic	Mainland	Non-islandic	Indomalayan	Indomalayan	Indomalayan	Insectivore	99	99	2051.67	4.9			1		1						2	1		1			2
1	Furipteridae	Yangochiroptera	Furipterus horrens	1				1		Unknown	Least Concern	Least Concern	Non Endemic	Mainland	Non-islandic	Neotropic	Neotropic	Neotropic	Insectivore	1188	1188	2070.53	3.2
1	Phyllostomidae	Yangochiroptera	Glossophaga commissarisi	1						Stable	Least Concern	Least Concern	Non Endemic	Mainland	Non-islandic	Neotropic	Neotropic	Neotropic	Omnivore	536	536	2064.28	8.9
1	Phyllostomidae	Yangochiroptera	Glossophaga leachii	1				1		Stable	Least Concern	Least Concern	Non Endemic	Mainland	Non-islandic	Neotropic	Neotropic	Neotropic	Omnivore	84	84	2064.28	10.1								1			1			1	1		2			1						1
1	Phyllostomidae	Yangochiroptera	Glossophaga longirostris	1				1		Unknown	Data Deficient	Data Deficient	Non Endemic	Mainland	Non-islandic	Neotropic	Neotropic	Neotropic	Nectarivore	227	227	2064.28	11.9	1										1			1			1
1	Phyllostomidae	Yangochiroptera	Glossophaga morenoi	1				1		Stable	Least Concern	Least Concern	Endemic	Mainland	Non-islandic	Neotropic	Neotropic	Neotropic	Omnivore	55	55	2064.28	8.4
1	Phyllostomidae	Yangochiroptera	Glossophaga soricina	1	1			1		Stable	Least Concern	Least Concern	Non Endemic	Mainland	Non-islandic	Neotropic	Neotropic	Neotropic	Omnivore	1821	1821	2064.28	9.4														1			1
1	Phyllostomidae	Yangochiroptera	Glyphonycteris sylvestris	1				1		Unknown	Least Concern	Least Concern	Non Endemic	Mainland	Non-islandic	Neotropic	Neotropic	Neotropic	Omnivore	791	791	2064.28	8.8	1		1		1						3
1	Pteropodidae	Yinpterochiroptera	Haplonycteris fischeri	1						Stable	Least Concern	Least Concern	Endemic	Small-ranging islands	Islandic	Indomalayan	Indomalayan	Indomalayan	Frugivore	78	78	1350.04	18							1				1	1	1	1			3
1	Vespertilionidae	Yangochiroptera	Harpiocephalus harpia	1						Decreasing	Least Concern	Least Concern	Non Endemic	Mainland	Non-islandic	Indomalayan	Indomalayan	Indomalayan	Insectivore	213	213	2051.67	16.3												1		1			2
1	Vespertilionidae	Yangochiroptera	Harpyionycteris celebensis	1						Decreasing	Vulnerable	Vulnerable	Endemic	Small-ranging islands	Islandic	Indomalayan	Indomalayan	Indomalayan	Insectivore	47	47	1825	104							1	1				1		1
1	Vespertilionidae	Yangochiroptera	Hesperoptenus blanfordi	1				1		Unknown	Least Concern	Least Concern	Non Endemic	Mainland	Non-islandic	Indomalayan	Indomalayan	Indomalayan	Insectivore	104	104	1825	6.5
1	Hipposideridae	Yinpterochiroptera	Hipposideros abae		1					Unknown	Least Concern	Least Concern	Non Endemic	Mainland	Non-islandic	Afrotropic	Afrotropic	Afrotropic	Insectivore	320	320	1834.23	25.5														1			1
1	Hipposideridae	Yinpterochiroptera	Hipposideros alongensis	1				1		Decreasing	Vulnerable	Vulnerable	Endemic	Mainland	Non-islandic	Indomalayan	Indomalayan	Indomalayan	Insectivore	19	19	1834.23	33.4	1		1				1		1			1	1	1
1	Hipposideridae	Yinpterochiroptera	Hipposideros armiger	1				1		Unknown	Least Concern	Least Concern	Non Endemic	Mainland	Non-islandic	Indomalayan	Indomalayan	Indomalayan	Insectivore	618	618	1834.23	53	1						1				2	1		1			2
1	Hipposideridae	Yinpterochiroptera	Hipposideros ater	1	1			1		Unknown	Least Concern	Least Concern	Non Endemic	Mainland	Non-islandic	Indomalayan to Oceania	Indomalayan	Cosmopolitan	Insectivore	782	782	1834.23	5.8	1		1	1			1				4	1		1			2
1	Hipposideridae	Yinpterochiroptera	Hipposideros ater	1	1			1		Unknown	Least Concern	Least Concern	Non Endemic	Mainland	Non-islandic	Indomalayan to Oceania	Oceania	Cosmopolitan	Insectivore	782	782	1835.23	5.8	1		1	1			1				4	1		1			2
1	Hipposideridae	Yinpterochiroptera	Hipposideros atrox	1				1		Stable	Least Concern	Least Concern	Non Endemic	Mainland	Non-islandic	Indomalayan	Indomalayan	Indomalayan	Insectivore	302	302	1834.23	7.6												1		1			2
1	Hipposideridae	Yinpterochiroptera	Hipposideros bicolor	1				1		Stable	Least Concern	Least Concern	Non Endemic	Mainland	Non-islandic	Indomalayan	Indomalayan	Indomalayan	Insectivore	302	302	1834.23	7.6	1		1	1			1				4			1			1
1	Hipposideridae	Yinpterochiroptera	Hipposideros breviceps	1				1		Unknown	Data Deficient	Data Deficient	Endemic	Small-ranging islands	Islandic	Indomalayan	Indomalayan	Indomalayan	Insectivore	2	2	1834.23	7.2
1	Hipposideridae	Yinpterochiroptera	Hipposideros caffer	1	1			1	1	Decreasing	Least Concern	Least Concern	Non Endemic	Mainland	Non-islandic	Afrotropic	Afrotropic	Afrotropic	Insectivore	944	944	1834.23	9.4			1	1							2
1	Hipposideridae	Yinpterochiroptera	Hipposideros calcaratus	1				1		Unknown	Least Concern	Least Concern	Non Endemic	Land bridges	Islandic	Indomalayan to Oceania	Indomalayan	Cosmopolitan	Insectivore	102	102	1834.23	11.4
1	Hipposideridae	Yinpterochiroptera	Hipposideros calcaratus	1				1		Unknown	Least Concern	Least Concern	Non Endemic	Land bridges	Islandic	Indomalayan to Oceania	Oceania	Cosmopolitan	Insectivore	102	102	1834.23	11.4
1	Hipposideridae	Yinpterochiroptera	Hipposideros cervinus	1				1		Unknown	Least Concern	Least Concern	Non Endemic	Mainland	Non-islandic	Indomalayan	Indomalayan	Indomalayan	Insectivore	438	438	1834.23	9.3	1										1
1	Hipposideridae	Yinpterochiroptera	Hipposideros cineraceus	1				1		Unknown	Least Concern	Least Concern	Non Endemic	Mainland	Non-islandic	Indomalayan	Indomalayan	Indomalayan	Insectivore	383	383	1834.23	4.7			1								1	1	1				2
1	Hipposideridae	Yinpterochiroptera	Hipposideros coronatus	1				1		Unknown	Data Deficient	Data Deficient	Endemic	Small-ranging islands	Islandic	Indomalayan	Indomalayan	Indomalayan	Insectivore	5	5	1834.23	9.5	1		1								2			1			1
1	Hipposideridae	Yinpterochiroptera	Hipposideros corynophyllus	1				1		Unknown	Least Concern	Least Concern	Endemic	Land bridges	Islandic	Indomalayan to Oceania	Indomalayan	Cosmopolitan	Insectivore	3	9	1834.23	14.5													1	1			2
1	Hipposideridae	Yinpterochiroptera	Hipposideros corynophyllus	1				1		Unknown	Least Concern	Least Concern	Endemic	Land bridges	Islandic	Indomalayan to Oceania	Oceania	Cosmopolitan	Insectivore	3	9	1835.23	14.5													1	1			2
1	Hipposideridae	Yinpterochiroptera	Hipposideros coxi							Decreasing	Endangered	Endangered	Endemic	Land bridges	Islandic	Indomalayan	Indomalayan	Indomalayan	Insectivore	4	4	1834.23	9.3	1					1					2			1			1
1	Hipposideridae	Yinpterochiroptera	Hipposideros curtus	1				1		Decreasing	Vulnerable	Vulnerable	Endemic	Mainland	Non-islandic	Afrotropic	Afrotropic	Afrotropic	Insectivore	29	29	1834.23	7.5			1	1	1						3			1			1
1	Hipposideridae	Yinpterochiroptera	Hipposideros demisus	1				1		Unknown	Vulnerable	Vulnerable	Endemic	Small-ranging islands	Islandic	Oceania	Oceania	Oceania	Insectivore	4	4	1834.23	24.9																								1	1	2
1	Hipposideridae	Yinpterochiroptera	Hipposideros diadema	1	1			1		Unknown	Least Concern	Least Concern	Non Endemic	Mainland	Non-islandic	Indomalayan to Oceania	Indomalayan	Cosmopolitan	Insectivore	725	725	1834.23	43.8	1		1			1	1				4	1		1			2
1	Hipposideridae	Yinpterochiroptera	Hipposideros diadema	1	1			1		Unknown	Least Concern	Least Concern	Non Endemic	Mainland	Non-islandic	Indomalayan to Oceania	Oceania	Cosmopolitan	Insectivore	725	725	1834.23	43.8	1		1			1	1				4	1		1			2
1	Hipposideridae	Yinpterochiroptera	Hipposideros dinops	1				1		Decreasing	Data Deficient	Data Deficient	Endemic	Small-ranging islands	Islandic	Oceania	Oceania	Oceania	Insectivore	17	17	1834.23	71.9			1	1	1						3			1			1
1	Hipposideridae	Yinpterochiroptera	Hipposideros durgadasi	1				1		Decreasing	Vulnerable	Vulnerable	Endemic	Mainland	Non-islandic	Indomalayan	Indomalayan	Indomalayan	Insectivore	10	10	1834.23	5.6	1		1	1	1						4
1	Hipposideridae	Yinpterochiroptera	Hipposideros dyacorum	1				1		Unknown	Least Concern	Least Concern	Non Endemic	Mainland	Non-islandic	Indomalayan	Indomalayan	Indomalayan	Insectivore	119	119	1834.23	6.1	1										1	1		1			2			1						1
1	Hipposideridae	Yinpterochiroptera	Hipposideros edwardshilli	1				1		Unknown	Vulnerable	Vulnerable	Endemic	Land bridges	Islandic	Oceania	Oceania	Oceania	Insectivore	1	1	1834.23	11.3														1			1
1	Hipposideridae	Yinpterochiroptera	Hipposideros fulvus	1				1		Stable	Least Concern	Least Concern	Non Endemic	Mainland	Non-islandic	Afrotropic to Indomalayan	Afrotropic	Cosmopolitan	Insectivore	325	325	1834.23	8.5	1		1								2				1		1
1	Hipposideridae	Yinpterochiroptera	Hipposideros fulvus	1				1		Stable	Least Concern	Least Concern	Non Endemic	Mainland	Non-islandic	Afrotropic to Indomalayan	Indomalayan	Cosmopolitan	Insectivore	325	325	1834.23	8.5	1		1								2				1		1
1	Hipposideridae	Yinpterochiroptera	Hipposideros galeritus	1				1		Unknown	Least Concern	Least Concern	Non Endemic	Mainland	Non-islandic	Indomalayan	Indomalayan	Indomalayan	Insectivore	411	411	1834.23	8.2	1		1								2	1		1			2
1	Hipposideridae	Yinpterochiroptera	Hipposideros grandis					1		Unknown	Least Concern	Least Concern	Non Endemic	Mainland	Non-islandic	Indomalayan	Indomalayan	Indomalayan	Insectivore	35	36	1834.23	16.3							1				1
1	Hipposideridae	Yinpterochiroptera	Hipposideros griffini	1				1		Decreasing	Near Threatened	Near Threatened	Endemic	Mainland	Non-islandic	Indomalayan	Indomalayan	Indomalayan	Insectivore	618	618	1834.23	53		1	1		1									1
1	Hipposideridae	Yinpterochiroptera	Hipposideros halophyllus	1				1		Decreasing	Vulnerable	Vulnerable	Non Endemic	Mainland	Non-islandic	Indomalayan	Indomalayan	Indomalayan	Insectivore	17	17	1834.23	4	1		1				1				3	1			1		2
1	Hipposideridae	Yinpterochiroptera	Hipposideros hypophyllus					1		Decreasing	Critically Endangered	Critically Endangered	Endemic	Mainland	Non-islandic	Indomalayan	Indomalayan	Indomalayan	Insectivore	4	4	1834.23	7.7	1										1	1			1		2
1	Hipposideridae	Yinpterochiroptera	Hipposideros inexpectus	1				1		Unknown	Data Deficient	Data Deficient	Endemic	Small-ranging islands	Islandic	Indomalayan	Indomalayan	Indomalayan	Insectivore	2	2	1834.23	70.4
1	Hipposideridae	Yinpterochiroptera	Hipposideros inornatus	1	1			1		Stable	Vulnerable	Vulnerable	Endemic	Mainland	Non-islandic	Oceania	Oceania	Oceania	Insectivore	2	3	1834.23	28.5			1		1						2
1	Hipposideridae	Yinpterochiroptera	Hipposideros jonesi	1	1			1		Decreasing	Near Threatened	Near Threatened	Non Endemic	Mainland	Non-islandic	Afrotropic	Afrotropic	Afrotropic	Insectivore	174	174	1834.23	5.5			1	1	1		1				4
1	Hipposideridae	Yinpterochiroptera	Hipposideros khaokhouayensis	1						Decreasing	Vulnerable	Vulnerable	Endemic	Mainland	Non-islandic	Indomalayan	Indomalayan	Indomalayan	Insectivore	7	7	1834.23	8.7													1	1			2
1	Hipposideridae	Yinpterochiroptera	Hipposideros khasiana	1				1		Unknown	Data Deficient	Data Deficient	Endemic	Mainland	Non-islandic	Indomalayan	Indomalayan	Indomalayan	Insectivore	520	520	1834.23	19.9
1	Hipposideridae	Yinpterochiroptera	Hipposideros lamottei	1				1		Decreasing	Critically Endangered	Critically Endangered	Endemic	Mainland	Non-islandic	Afrotropic	Afrotropic	Afrotropic	Insectivore	2	2	1834.23	13.1	1						1				2			1			1
1	Hipposideridae	Yinpterochiroptera	Hipposideros lankadiva	1				1		Unknown	Least Concern	Least Concern	Non Endemic	Mainland	Non-islandic	Indomalayan	Indomalayan	Indomalayan	Insectivore	127	127	1834.23	52.4							1				1	1		1			2
1	Hipposideridae	Yinpterochiroptera	Hipposideros larvatus	1				1		Unknown	Least Concern	Least Concern	Non Endemic	Mainland	Non-islandic	Indomalayan	Indomalayan	Indomalayan	Insectivore	520	520	1834.23	19.9	1		1	1			1				4
1	Hipposideridae	Yinpterochiroptera	Hipposideros lekaguli	1				1		Decreasing	Near Threatened	Near Threatened	Non Endemic	Mainland	Non-islandic	Indomalayan	Indomalayan	Indomalayan	Insectivore	37	37	1834.23	31.1		1	1								2
1	Hipposideridae	Yinpterochiroptera	Hipposideros lylei	1				1		Decreasing	Least Concern	Least Concern	Non Endemic	Mainland	Non-islandic	Indomalayan to Paleartic	Indomalayan	Cosmopolitan	Insectivore	159	159	1834.23	40	1		1		1		1				4
1	Hipposideridae	Yinpterochiroptera	Hipposideros lylei	1				1		Decreasing	Least Concern	Least Concern	Non Endemic	Mainland	Non-islandic	Indomalayan to Paleartic	Palearctic	Cosmopolitan	Insectivore	159	159	1834.23	40	1		1		1		1				4
1	Hipposideridae	Yinpterochiroptera	Hipposideros macrobullatus	1				1		Unknown	Data Deficient	Data Deficient	Endemic	Land bridges	Islandic	Indomalayan	Indomalayan	Indomalayan	Insectivore	9	16	1834.23	5.8														1			1
1	Hipposideridae	Yinpterochiroptera	Hipposideros madurae	1				1		Unknown	Least Concern	Least Concern	Endemic	Land bridges	Islandic	Indomalayan	Indomalayan	Indomalayan	Insectivore	17	17	1834.23	13.9	1										1			1			1
1	Hipposideridae	Yinpterochiroptera	Hipposideros maggietaylorae	1				1		Stable	Least Concern	Least Concern	Endemic	Land bridges	Islandic	Indomalayan to Oceania	Indomalayan	Cosmopolitan	Insectivore	87	87	1834.23	18.5
1	Hipposideridae	Yinpterochiroptera	Hipposideros maggietaylorae	1				1		Stable	Least Concern	Least Concern	Endemic	Land bridges	Islandic	Indomalayan to Oceania	Oceania	Cosmopolitan	Insectivore	87	87	1834.23	18.5
1	Hipposideridae	Yinpterochiroptera	Hipposideros marisae	1				1		Decreasing	Vulnerable	Vulnerable	Non Endemic	Mainland	Non-islandic	Afrotropic	Afrotropic	Afrotropic	Insectivore	10	10	1834.23	6.1	1						1				2			1			1
1	Hipposideridae	Yinpterochiroptera	Hipposideros megalotis		1					Unknown	Least Concern	Least Concern	Non Endemic	Mainland	Non-islandic	Palearctic to Afrotropic	Palearctic	Cosmopolitan	Insectivore	135	135	1834.23	5.6			1	1	1						3	1					1
1	Hipposideridae	Yinpterochiroptera	Hipposideros megalotis		1					Unknown	Least Concern	Least Concern	Non Endemic	Mainland	Non-islandic	Palearctic to Afrotropic	Afrotropic	Cosmopolitan	Insectivore	135	135	1834.23	5.6			1	1	1						3	1					1
1	Hipposideridae	Yinpterochiroptera	Hipposideros obscurus	1				1		Unknown	Least Concern	Least Concern	Endemic	Small-ranging islands	Islandic	Indomalayan	Indomalayan	Indomalayan	Insectivore	56	56	1834.23	9.5														1			1
1	Hipposideridae	Yinpterochiroptera	Hipposideros papua	1				1		Stable	Least Concern	Least Concern	Endemic	Small-ranging islands	Islandic	Indomalayan	Indomalayan	Indomalayan	Insectivore	16	16	1834.23	10.1	1		1	1							3
1	Hipposideridae	Yinpterochiroptera	Hipposideros pelingensis					1		Decreasing	Near Threatened	Near Threatened	Endemic	Small-ranging islands	Islandic	Indomalayan	Indomalayan	Indomalayan	Insectivore	54	54	1834.23	56.2	1										1
1	Hipposideridae	Yinpterochiroptera	Hipposideros pendleburyi	1				1		Decreasing	Vulnerable	Vulnerable	Endemic	Mainland	Non-islandic	Indomalayan	Indomalayan	Indomalayan	Insectivore	19	19	1834.23	33.4	1	1	1									1	1	1
1	Hipposideridae	Yinpterochiroptera	Hipposideros pomona	1				1		Unknown	Least Concern	Least Concern	Non Endemic	Mainland	Non-islandic	Indomalayan	Indomalayan	Indomalayan	Insectivore	412	412	1834.23	6.2			1				1				2
1	Hipposideridae	Yinpterochiroptera	Hipposideros pratti					1		Unknown	Least Concern	Least Concern	Non Endemic	Mainland	Non-islandic	Indomalayan	Indomalayan	Indomalayan	Insectivore	289	289	1834.23	56
1	Hipposideridae	Yinpterochiroptera	Hipposideros pygmaeus	1				1		Unknown	Least Concern	Least Concern	Endemic	Small-ranging islands	Islandic	Indomalayan	Indomalayan	Indomalayan	Insectivore	28	28	1834.23	3.5														1			1
1	Hipposideridae	Yinpterochiroptera	Hipposideros ridleyi	1	1			1		Decreasing	Vulnerable	Vulnerable	Non Endemic	Small-ranging islands	Islandic	Indomalayan	Indomalayan	Indomalayan	Insectivore	54	71	1834.23	8.8
1	Hipposideridae	Yinpterochiroptera	Hipposideros ruber	1				1		Unknown	Least Concern	Least Concern	Non Endemic	Mainland	Non-islandic	Afrotropic	Afrotropic	Afrotropic	Insectivore	1105	1105	1834.23	10.1							1				1			1			1
1	Hipposideridae	Yinpterochiroptera	Hipposideros scutinares	1	1			1		Decreasing	Vulnerable	Vulnerable	Endemic	Mainland	Non-islandic	Indomalayan	Indomalayan	Indomalayan	Insectivore	6	6	1834.23	40	1		1	1	1		1				5
1	Hipposideridae	Yinpterochiroptera	Hipposideros semoni					1		Unknown	Least Concern	Least Concern	Non Endemic	Mainland	Non-islandic	Oceania	Oceania	Oceania	Insectivore	27	27	1834.23	7.5												1		1			2		1	1						2
1	Hipposideridae	Yinpterochiroptera	Hipposideros sorenseni	1				1		Unknown	Vulnerable	Vulnerable	Endemic	Land bridges	Islandic	Indomalayan	Indomalayan	Indomalayan	Insectivore	1	1	1834.23	20.2	1										1
1	Hipposideridae	Yinpterochiroptera	Hipposideros speoris	1				1		Stable	Least Concern	Least Concern	Endemic	Mainland	Non-islandic	Indomalayan	Indomalayan	Indomalayan	Insectivore	179	179	1834.23	10.4	1		1				1	1			4		1				1
1	Hipposideridae	Yinpterochiroptera	Hipposideros stenotis		1			1		Unknown	Least Concern	Least Concern	Endemic	Mainland	Non-islandic	Oceania	Oceania	Oceania	Insectivore	90	90	1834.23	12
1	Hipposideridae	Yinpterochiroptera	Hipposideros sumbae					1		Decreasing	Least Concern	Least Concern	Endemic	Small-ranging islands	Islandic	Indomalayan	Indomalayan	Indomalayan	Insectivore	26	26	1834.23	13.3	1										1
1	Hipposideridae	Yinpterochiroptera	Hipposideros tephrus	1	1					Unknown	Least Concern	Least Concern	Non Endemic	Mainland	Non-islandic	Palearctic	Palearctic	Palearctic	Insectivore	944	944	1834.23	9.4			1	1	1		1				4
1	Hipposideridae	Yinpterochiroptera	Hipposideros turpis	1				1	1	Decreasing	Near Threatened	Near Threatened	Non Endemic	Mainland	Non-islandic	Indomalayan to Paleartic	Indomalayan	Cosmopolitan	Insectivore	19	19	1834.23	33.4			1	1	1						3		1	1			2
1	Hipposideridae	Yinpterochiroptera	Hipposideros turpis	1	1			1		Decreasing	Near Threatened	Near Threatened	Non Endemic	Mainland	Non-islandic	Indomalayan to Paleartic	Palearctic	Cosmopolitan	Insectivore	19	19	1834.23	33.4			1	1	1						3		1	1			2
1	Hipposideridae	Yinpterochiroptera	Hipposideros wollastoni	1				1		Unknown	Least Concern	Least Concern	Endemic	Land bridges	Islandic	Indomalayan	Indomalayan	Indomalayan	Insectivore	21	21	1834.23	6.8												1		1			2
1	Vespertilionidae	Yangochiroptera	Histiotus montanus	1				1		Unknown	Least Concern	Least Concern	Non Endemic	Mainland	Non-islandic	Neotropic	Neotropic	Neotropic	Insectivore	488	488	2051.67	9.1
1	Vespertilionidae	Yangochiroptera	Histiotus velatus	1	1			1		Unknown	Data Deficient	Data Deficient	Non Endemic	Mainland	Non-islandic	Neotropic	Neotropic	Neotropic	Insectivore	430	430	2051.67	11.2														1			1
1	Phyllostomidae	Yangochiroptera	Hylonycteris underwoodi	1				1		Stable	Least Concern	Least Concern	Non Endemic	Mainland	Non-islandic	Neotropic	Neotropic	Neotropic	Omnivore	41	41	2064.28	6.7
1	Vespertilionidae	Yangochiroptera	Hypsugo alaschanicus	1				1		Unknown	Least Concern	Least Concern	Non Endemic	Mainland	Non-islandic	Indomalayan	Indomalayan	Indomalayan	Insectivore	398	398	1885.95	8.2
1	Vespertilionidae	Yangochiroptera	Hypsugo cadornae	1				1		Unknown	Least Concern	Least Concern	Non Endemic	Mainland	Non-islandic	Indomalayan	Indomalayan	Indomalayan	Insectivore	84	84	1885.95	6.7
1	Vespertilionidae	Yangochiroptera	Hypsugo dolichodon	1				1		Unknown	Data Deficient	Data Deficient	Non Endemic	Mainland	Non-islandic	Indomalayan	Indomalayan	Indomalayan	Insectivore	236	236	1885.95	49.2			1		1								1
1	Vespertilionidae	Yangochiroptera	Hypsugo pulveratus	1				1		Unknown	Least Concern	Least Concern	Non Endemic	Mainland	Non-islandic	Indomalayan	Indomalayan	Indomalayan	Insectivore	353	353	1885.95	5.5
1	Vespertilionidae	Yangochiroptera	Hypsugo savii	1		1			1	Stable	Least Concern	Least Concern	Non Endemic	Mainland	Non-islandic	Palearctic	Palearctic	Palearctic	Insectivore	751	751	1885.95	6.4
1	Vespertilionidae	Yangochiroptera	Ia io	1				1		Unknown	Least Concern	Least Concern	Non Endemic	Mainland	Non-islandic	Indomalayan	Indomalayan	Indomalayan	Insectivore	236	236	2051.67	49.2	1				1						2	1		1			2
1	Vespertilionidae	Yangochiroptera	Idionycteris phyllotis	1		1		1		Stable	Least Concern	Least Concern	Non Endemic	Mainland	Non-islandic	Nearctic	Nearctic	Nearctic	Insectivore	193	193	2051.67	12	1		1		1				1		4		1				1
1	Vespertilionidae	Yangochiroptera	Kerivoula hardwickii	1				1		Stable	Least Concern	Least Concern	Non Endemic	Mainland	Non-islandic	Indomalayan	Indomalayan	Indomalayan	Insectivore	678	678	1825	4.6
1	Vespertilionidae	Yangochiroptera	Kerivoula kachinensis	1						Stable	Least Concern	Least Concern	Non Endemic	Mainland	Non-islandic	Indomalayan	Indomalayan	Indomalayan	Insectivore	95	95	1825	4.8
1	Vespertilionidae	Yangochiroptera	Kerivoula papillosa	1						Unknown	Least Concern	Least Concern	Non Endemic	Mainland	Non-islandic	Indomalayan	Indomalayan	Indomalayan	Insectivore	204	204	1825	9.8														1			1
1	Vespertilionidae	Yangochiroptera	Kerivoula pellucida	1						Decreasing	Near Threatened	Near Threatened	Non Endemic	Mainland	Non-islandic	Indomalayan	Indomalayan	Indomalayan	Insectivore	224	224	1825	4.1												1		1			2			1						1
1	Vespertilionidae	Yangochiroptera	Kerivoula picta	1						Unknown	Least Concern	Least Concern	Non Endemic	Mainland	Non-islandic	Indomalayan	Indomalayan	Indomalayan	Insectivore	503	503	1825	4.5												1	1	1			3
1	Vespertilionidae	Yangochiroptera	Kerivoula titania	1						Unknown	Least Concern	Least Concern	Non Endemic	Mainland	Non-islandic	Indomalayan	Indomalayan	Indomalayan	Insectivore	92	92	1825	4.6												1		1			2
1	Vespertilionidae	Yangochiroptera	Kerivoula whiteheadi	1						Unknown	Least Concern	Least Concern	Non Endemic	Mainland	Non-islandic	Indomalayan	Indomalayan	Indomalayan	Insectivore	77	77	1825	3.9	1										1			1			1
1	Phyllostomidae	Yangochiroptera	Lampronycteris brachyotis	1				1		Stable	Least Concern	Least Concern	Non Endemic	Mainland	Non-islandic	Neotropic	Neotropic	Neotropic	Insectivore	518	518	2064.28	11														1			1
1	Vespertilionidae	Yangochiroptera	Lasionycteris noctivagans	1				1		Stable	Least Concern	Least Concern	Non Endemic	Mainland	Non-islandic	Nearctic	Nearctic	Nearctic	Insectivore	1271	1271	1450.04	10.5														1			1
1	Vespertilionidae	Yangochiroptera	Lasiurus blossevillii	1	1			1		Unknown	Least Concern	Least Concern	Non Endemic	Mainland	Non-islandic	Neotropic	Neotropic	Neotropic	Insectivore	2283	2283	2051.67	13
1	Vespertilionidae	Yangochiroptera	Lasiurus cinereus	1	1			1	1	Unknown	Least Concern	Least Concern	Non Endemic	Mainland	Non-islandic	Nearctic to Neotropic	Nearctic	Cosmopolitan	Insectivore	2642	2642	2051.67	25.3			1								1			1			1
1	Vespertilionidae	Yangochiroptera	Lasiurus cinereus	1	1			1	1	Unknown	Least Concern	Least Concern	Non Endemic	Mainland	Non-islandic	Nearctic to Neotropic	Neotropic	Cosmopolitan	Insectivore	2642	2642	2051.67	25.3			1								1			1			1
1	Vespertilionidae	Yangochiroptera	Lasiurus ega	1	1			1	1	Unknown	Least Concern	Least Concern	Non Endemic	Mainland	Non-islandic	Neotropic	Neotropic	Neotropic	Insectivore	1628	1628	2051.67	13.2
1	Vespertilionidae	Yangochiroptera	Lasiurus minor	1						Decreasing	Vulnerable	Vulnerable	Non Endemic	Small-ranging islands	Islandic	Neotropic	Neotropic	Neotropic	Insectivore	25	25	2051.67	9.4														1			1							1	1	2
1	Vespertilionidae	Yangochiroptera	Lasiurus seminolus	1						Unknown	Least Concern	Least Concern	Non Endemic	Mainland	Non-islandic	Nearctic to Neotropic	Nearctic	Cosmopolitan	Insectivore	192	192	2055.24	9.9								1
1	Vespertilionidae	Yangochiroptera	Lasiurus seminolus	1						Unknown	Least Concern	Least Concern	Non Endemic	Mainland	Non-islandic	Nearctic to Neotropic	Neotropic	Cosmopolitan	Insectivore	192	192	2055.24	9.9								1
1	Pteropodidae	Yinpterochiroptera	Latidens salimalii	1				1		Decreasing	Endangered	Endangered	Endemic	Mainland	Non-islandic	Indomalayan	Indomalayan	Indomalayan	Frugivore	6	6	2349.86	55.2			1	1			1	1			4			1			1
1	Phyllostomidae	Yangochiroptera	Leptonycteris curasoae	1				1		Decreasing	Vulnerable	Vulnerable	Non Endemic	Mainland	Non-islandic	Neotropic	Neotropic	Neotropic	Omnivore	126	126	2064.28	23.4	Occurs on mainland		1		1						2			1			1
1	Phyllostomidae	Yangochiroptera	Leptonycteris nivalis	1		1		1		Decreasing	Endangered	Endangered	Non Endemic	Mainland	Non-islandic	Nearctic to Neotropic	Nearctic	Cosmopolitan	Omnivore	140	140	2064.28	25.6	1		1		1			1			4	1	1	1		1	4		1							1
1	Phyllostomidae	Yangochiroptera	Leptonycteris nivalis	1		1		1		Decreasing	Endangered	Endangered	Non Endemic	Mainland	Non-islandic	Nearctic to Neotropic	Neotropic	Cosmopolitan	Omnivore	140	140	2064.28	25.6	1		1		1			1			4	1	1	1		1	4		1							1
1	Phyllostomidae	Yangochiroptera	Leptonycteris yerbabuenae	1				1		Decreasing	Near Threatened	Near Threatened	Non Endemic	Mainland	Non-islandic	Neotropic	Neotropic	Neotropic	Omnivore	209	209	2064.28	20	1		1					1			3	1		1			2
1	Phyllostomidae	Yangochiroptera	Lionycteris spurrelli	1	1			1		Unknown	Least Concern	Least Concern	Non Endemic	Mainland	Non-islandic	Neotropic	Neotropic	Neotropic	Omnivore	861	861	2064.28	8.4	1		1								2			1			1
1	Phyllostomidae	Yangochiroptera	Lonchophylla concava	1						Unknown	Least Concern	Least Concern	Non Endemic	Mainland	Non-islandic	Neotropic	Neotropic	Neotropic	Omnivore	51	51	2064.28	7.4	1							1				1		1
1	Phyllostomidae	Yangochiroptera	Lonchophylla dekeyserii		1			1		Decreasing	Endangered	Endangered	Non Endemic	Mainland	Non-islandic	Neotropic	Neotropic	Neotropic	Omnivore	9	9	2064.28	11.2	1							1			2			1			1
1	Phyllostomidae	Yangochiroptera	Lonchophylla handleyi	1				1		Unknown	Least Concern	Least Concern	Non Endemic	Mainland	Non-islandic	Neotropic	Neotropic	Neotropic	Omnivore	23	23	2064.28	18.5	1		1	1	1						4			1			1
1	Phyllostomidae	Yangochiroptera	Lonchophylla mordax	1	1			1		Unknown	Near Threatened	Near Threatened	Endemic	Mainland	Non-islandic	Neotropic	Neotropic	Neotropic	Omnivore	7	7	2064.28	9	1										1			1			1
1	Phyllostomidae	Yangochiroptera	Lonchophylla robusta	1				1		Unknown	Least Concern	Least Concern	Non Endemic	Mainland	Non-islandic	Neotropic	Neotropic	Neotropic	Omnivore	181	181	2064.28	17.2
1	Phyllostomidae	Yangochiroptera	Lonchophylla thomasi	1				1		Unknown	Least Concern	Least Concern	Non Endemic	Mainland	Non-islandic	Neotropic	Neotropic	Neotropic	Omnivore	982	982	2064.28	6.9														1
1	Phyllostomidae	Yangochiroptera	Lonchorhina aurita	1	1			1	1	Stable	Least Concern	Least Concern	Non Endemic	Mainland	Non-islandic	Neotropic	Neotropic	Neotropic	Insectivore	1401	1401	2064.28	15.7	1		1								2			1			1
1	Phyllostomidae	Yangochiroptera	Lonchorhina fernandezi		1			1		Decreasing	Endangered	Endangered	Non Endemic	Mainland	Non-islandic	Neotropic	Neotropic	Neotropic	Omnivore	21	21	2064.28	8.7	1		1					1			3					1	1
1	Phyllostomidae	Yangochiroptera	Lonchorhina inusitata	1				1		Unknown	Data Deficient	Data Deficient	Non Endemic	Mainland	Non-islandic	Neotropic	Neotropic	Neotropic	Insectivore	350	350	2064.28	18.6	1		1		1						3			1			1
1	Phyllostomidae	Yangochiroptera	Lonchorhina marinkellei					1		Unknown	Vulnerable	Vulnerable	Endemic	Mainland	Non-islandic	Neotropic	Neotropic	Neotropic	Insectivore	36	36	2064.28	17												1					1		1							1
1	Phyllostomidae	Yangochiroptera	Lonchorhina orinocensis	1	1			1		Decreasing	Vulnerable	Vulnerable	Non Endemic	Mainland	Non-islandic	Neotropic	Neotropic	Neotropic	Insectivore	64	64	2064.28	8.8	1							1			2			1			1
1	Phyllostomidae	Yangochiroptera	Lophostoma silvicolum	1	1			1	1	Unknown	Least Concern	Least Concern	Non Endemic	Mainland	Non-islandic	Neotropic	Neotropic	Neotropic	Omnivore	981	981	2064.28	29.7														1			1
1	Megadermatidae	Yinpterochiroptera	Lyroderma lyra	1				1		Unknown	Least Concern	Least Concern	Non Endemic	Mainland	Non-islandic	Indomalayan to Paleartic	Indomalayan	Cosmopolitan	Carnivore	844	844	1985.8	45.5	1	1					1				3
1	Megadermatidae	Yinpterochiroptera	Lyroderma lyra	1				1		Unknown	Least Concern	Least Concern	Non Endemic	Mainland	Non-islandic	Indomalayan to Paleartic	Palearctic	Cosmopolitan	Carnivore	844	844	1985.8	45.5	1	1					1				3
1	Megadermatidae	Yinpterochiroptera	Macroderma gigas	1	1			1		Decreasing	Vulnerable	Vulnerable	Endemic	Mainland	Non-islandic	Oceania	Oceania	Oceania	Insectivore	196	539	1985.8	126.4	1		1								2	1					1		1							1
1	Hipposideridae	Yinpterochiroptera	Macronycteris commersoni	1				1		Decreasing	Near Threatened	Near Threatened	Endemic	Small-ranging islands	Islandic	Afrotropic	Afrotropic	Afrotropic	Insectivore	82	82	1834.23	99.1							1				1
1	Hipposideridae	Yinpterochiroptera	Macronycteris gigas	1	1			1		Unknown	Least Concern	Least Concern	Non Endemic	Mainland	Non-islandic	Afrotropic	Afrotropic	Afrotropic	Insectivore	487	487	1834.23	166.5			1	1	1		1				4				1		1
1	Hipposideridae	Yinpterochiroptera	Macronycteris thomensis	1				1		Stable	Least Concern	Least Concern	Endemic	Small-ranging islands	Islandic	Afrotropic	Afrotropic	Afrotropic	Insectivore	2	2	1834.23	67
1	Hipposideridae	Yinpterochiroptera	Macronycteris vittatus	1	1			1		Decreasing	Near Threatened	Near Threatened	Non Endemic	Mainland	Non-islandic	Afrotropic	Afrotropic	Afrotropic	Insectivore	529	529	1834.23	127.9	1		1				1				3
1	Phyllostomidae	Yangochiroptera	Macrophyllum macrophyllum	1	1			1	1	Unknown	Least Concern	Least Concern	Non Endemic	Mainland	Non-islandic	Neotropic	Neotropic	Neotropic	Omnivore	1552	1552	2064.28	8.1														1			1
1	Phyllostomidae	Yangochiroptera	Macrotus californicus	1				1		Stable	Least Concern	Least Concern	Non Endemic	Mainland	Non-islandic	Nearctic to Neotropic	Nearctic	Cosmopolitan	Omnivore	118	118	1709.3	11.6	1		1								2		1	1			2
1	Phyllostomidae	Yangochiroptera	Macrotus californicus	1				1		Stable	Least Concern	Least Concern	Non Endemic	Mainland	Non-islandic	Nearctic to Neotropic	Neotropic	Cosmopolitan	Omnivore	118	118	1709.3	11.6	1		1								2		1	1			2
1	Phyllostomidae	Yangochiroptera	Macrotus waterhousii	1				1		Stable	Least Concern	Least Concern	Non Endemic	Mainland	Non-islandic	Neotropic	Neotropic	Neotropic	Insectivore	163	163	1709.3	12.8
1	Megadermatidae	Yinpterochiroptera	Megaderma spasma	1				1		Unknown	Least Concern	Least Concern	Non Endemic	Mainland	Non-islandic	Indomalayan	Indomalayan	Indomalayan	Carnivore	724	724	1985.8	25.4	1			1							2	1		1			2
1	Pteropodidae	Yinpterochiroptera	Megaerops niphanae	1			1			Unknown	Least Concern	Least Concern	Non Endemic	Mainland	Non-islandic	Indomalayan	Indomalayan	Indomalayan	Frugivore	203	203	1825	32.6														1			1
1	Pteropodidae	Yinpterochiroptera	Megaerops wetmorei	1						Decreasing	Vulnerable	Vulnerable	Endemic	Mainland	Non-islandic	Indomalayan	Indomalayan	Indomalayan	Frugivore	54	116	1825	18.5												1		1			2			1						1
1	Phyllostomidae	Yangochiroptera	Micronycteris buriri	1						Unknown	Data Deficient	Data Deficient	Endemic	Small-ranging islands	Islandic	Neotropic	Neotropic	Neotropic	Omnivore	1	1	2064.28	7
1	Phyllostomidae	Yangochiroptera	Micronycteris megalotis	1	1			1		Unknown	Least Concern	Least Concern	Non Endemic	Mainland	Non-islandic	Neotropic	Neotropic	Neotropic	Omnivore	1423	1423	2064.28	6.1														1			1
1	Phyllostomidae	Yangochiroptera	Micronycteris microtis	1				1		Stable	Least Concern	Least Concern	Non Endemic	Mainland	Non-islandic	Neotropic	Neotropic	Neotropic	Omnivore	646	646	2064.28	5.6
1	Phyllostomidae	Yangochiroptera	Micronycteris minuta	1	1			1	1	Unknown	Least Concern	Least Concern	Non Endemic	Mainland	Non-islandic	Neotropic	Neotropic	Neotropic	Omnivore	1434	1434	2064.28	6.5														1			1
1	Pteropodidae	Yinpterochiroptera	Micropteropus intermedius	1	1					Unknown	Data Deficient	Data Deficient	Non Endemic	Mainland	Non-islandic	Afrotropic	Afrotropic	Afrotropic	Insectivore	35	35	1553.79	44														1
1	Phyllostomidae	Yangochiroptera	Mimon bennettii	1	1			1	1	Stable	Least Concern	Least Concern	Non Endemic	Mainland	Non-islandic	Neotropic	Neotropic	Neotropic	Carnivore	568	568	2064.28	25.2			1								1			1			1
1	Phyllostomidae	Yangochiroptera	Mimon cozumelae	1				1		Stable	Least Concern	Least Concern	Non Endemic	Mainland	Non-islandic	Neotropic	Neotropic	Neotropic	Omnivore	146	146	2064.28	12.4
1	Phyllostomidae	Yangochiroptera	Mimon crenulatum	1	1			1	1	Stable	Least Concern	Least Concern	Non Endemic	Mainland	Non-islandic	Neotropic	Neotropic	Neotropic	Insectivore	1333	1333	2064.28	13.8														1			1
1	Miniopteridae	Yangochiroptera	Miniopterus aelleni	1						Unknown	Least Concern	Least Concern	Endemic	Small-ranging islands	Islandic	Afrotropic	Afrotropic	Afrotropic	Insectivore	82	82	1995.7	5
1	Miniopteridae	Yangochiroptera	Miniopterus africanus	1						Unknown	Data Deficient	Data Deficient	Non Endemic	Mainland	Non-islandic	Afrotropic	Afrotropic	Afrotropic	Insectivore	1	1	1995.7	7.3												1		1
1	Miniopteridae	Yangochiroptera	Miniopterus australis	1				1		Stable	Least Concern	Least Concern	Non Endemic	Mainland	Non-islandic	Indomalayan to Oceania	Indomalayan	Cosmopolitan	Insectivore	524	524	1995.7	6.2			1	1							2
1	Miniopteridae	Yangochiroptera	Miniopterus australis	1				1		Stable	Least Concern	Least Concern	Non Endemic	Mainland	Non-islandic	Indomalayan to Oceania	Oceania	Cosmopolitan	Insectivore	524	524	1995.7	6.2			1	1							2
1	Miniopteridae	Yangochiroptera	Miniopterus brachytragos	1						Unknown	Least Concern	Least Concern	Endemic	Mainland	Non-islandic	Afrotropic	Afrotropic	Afrotropic	Insectivore	82	82	1995.7	5
1	Miniopteridae	Yangochiroptera	Miniopterus fraterculus	1	1			1		Unknown	Least Concern	Least Concern	Non Endemic	Small-ranging islands	Islandic	Afrotropic	Afrotropic	Afrotropic	Insectivore	264	264	1995.7	7.3
1	Miniopteridae	Yangochiroptera	Miniopterus fuliginosus	1						Unknown	Data Deficient	Data Deficient	Non Endemic	Mainland	Non-islandic	Indomalayan	Indomalayan	Indomalayan	Insectivore	619	619	1995.7	8
1	Miniopteridae	Yangochiroptera	Miniopterus fuscus	1				1	1	Decreasing	Endangered	Endangered	Endemic	Small-ranging islands	Islandic	Palearctic	Palearctic	Palearctic	Insectivore	10	10	1995.7	10.7			1								1		1				1
1	Miniopteridae	Yangochiroptera	Miniopterus gleni	1				1		Unknown	Least Concern	Least Concern	Endemic	Small-ranging islands	Islandic	Afrotropic	Afrotropic	Afrotropic	Insectivore	69	69	1995.7	14							1				1
1	Miniopteridae	Yangochiroptera	Miniopterus griffithsi	1						Unknown	Data Deficient	Data Deficient	Endemic	Mainland	Non-islandic	Afrotropic	Afrotropic	Afrotropic	Insectivore	1	1	1995.7	14.2
1	Miniopteridae	Yangochiroptera	Miniopterus inflatus	1				1		Unknown	Least Concern	Least Concern	Non Endemic	Land bridges	Islandic	Afrotropic	Afrotropic	Afrotropic	Insectivore	340	340	1995.7	14.2			1								1
1	Miniopteridae	Yangochiroptera	Miniopterus macrocneme	1				1		Unknown	Data Deficient	Data Deficient	Non Endemic	Mainland	Non-islandic	Indomalayan to Oceania	Indomalayan	Cosmopolitan	Insectivore	134	134	1995.7	9.2							1				1
1	Miniopteridae	Yangochiroptera	Miniopterus macrocneme	1				1		Unknown	Data Deficient	Data Deficient	Non Endemic	Mainland	Non-islandic	Indomalayan to Oceania	Oceania	Cosmopolitan	Insectivore	134	134	1995.7	9.2							1				1
1	Miniopteridae	Yangochiroptera	Miniopterus maghrebensis	1				1		Unknown	Near Threatened	Near Threatened	Non Endemic	Mainland	Non-islandic	Palearctic	Palearctic	Palearctic	Insectivore	619	619	1995.7	8.1															1		1
1	Miniopteridae	Yangochiroptera	Miniopterus magnater	1				1		Stable	Least Concern	Least Concern	Non Endemic	Mainland	Non-islandic	Indomalayan to Oceania	Indomalayan	Cosmopolitan	Insectivore	495	495	1995.7	14.1	1		1		1						3
1	Miniopteridae	Yangochiroptera	Miniopterus magnater	1				1		Stable	Least Concern	Least Concern	Non Endemic	Mainland	Non-islandic	Indomalayan to Oceania	Oceania	Cosmopolitan	Insectivore	495	495	1995.7	14.1	1		1		1						3
1	Miniopteridae	Yangochiroptera	Miniopterus mahafaliensis	1						Unknown	Least Concern	Least Concern	Endemic	Small-ranging islands	Islandic	Afrotropic	Afrotropic	Afrotropic	Insectivore	236	236	1995.7	9
1	Miniopteridae	Yangochiroptera	Miniopterus majori	1				1		Unknown	Least Concern	Least Concern	Endemic	Small-ranging islands	Islandic	Afrotropic	Afrotropic	Afrotropic	Insectivore	54	54	1995.7	8			1		1		1				3
1	Miniopteridae	Yangochiroptera	Miniopterus medius	1				1		Unknown	Least Concern	Least Concern	Non Endemic	Mainland	Non-islandic	Indomalayan	Indomalayan	Indomalayan	Insectivore	236	236	1995.7	9	1		1		1						3
1	Miniopteridae	Yangochiroptera	Miniopterus minor	1						Unknown	Data Deficient	Data Deficient	Non Endemic	Mainland	Non-islandic	Afrotropic	Afrotropic	Afrotropic	Insectivore	29	29	1995.7	7
1	Miniopteridae	Yangochiroptera	Miniopterus natalensis		1	1		1		Unknown	Least Concern	Least Concern	Non Endemic	Mainland	Non-islandic	Palearctic to Afrotropic	Palearctic	Cosmopolitan	Insectivore	586	586	1995.7	12.5			1		1						2	1			1		2
1	Miniopteridae	Yangochiroptera	Miniopterus natalensis		1	1		1		Unknown	Least Concern	Least Concern	Non Endemic	Mainland	Non-islandic	Palearctic to Afrotropic	Afrotropic	Cosmopolitan	Insectivore	586	586	1995.7	12.5			1		1						2	1			1		2
1	Miniopteridae	Yangochiroptera	Miniopterus newtoni	1						Unknown	Data Deficient	Data Deficient	Endemic	Small-ranging islands	Islandic	Afrotropic	Afrotropic	Afrotropic	Insectivore	2	2	1995.7	6.6
1	Miniopteridae	Yangochiroptera	Miniopterus pallidus	1				1		Unknown	Data Deficient	Data Deficient	Non Endemic	Mainland	Non-islandic	Afrotropic	Afrotropic	Afrotropic	Insectivore	1	1	1995.7	8.1
1	Miniopteridae	Yangochiroptera	Miniopterus petersoni	1						Unknown	Data Deficient	Data Deficient	Endemic	Small-ranging islands	Islandic	Afrotropic	Afrotropic	Afrotropic	Insectivore	12	12	1995.7	6														1			1
1	Miniopteridae	Yangochiroptera	Miniopterus pusillus	1				1		Unknown	Least Concern	Least Concern	Non Endemic	Mainland	Non-islandic	Indomalayan	Indomalayan	Indomalayan	Insectivore	213	213	1995.7	8.6			1				1				2			1			1
1	Miniopteridae	Yangochiroptera	Miniopterus schreibersii	1				1		Decreasing	Near Threatened	Near Threatened	Non Endemic	Mainland	Non-islandic	Indomalayan to Paleartic	Indomalayan	Cosmopolitan	Insectivore	619	619	1995.7	8.1			1								1				1		1
1	Miniopteridae	Yangochiroptera	Miniopterus schreibersii	1				1		Decreasing	Near Threatened	Near Threatened	Non Endemic	Mainland	Non-islandic	Indomalayan to Paleartic	Palearctic	Cosmopolitan	Insectivore	619	619	1995.7	8.1			1								1				1		1
1	Miniopteridae	Yangochiroptera	Miniopterus sororculus		1					Unknown	Least Concern	Least Concern	Endemic	Small-ranging islands	Islandic	Afrotropic	Afrotropic	Afrotropic	Insectivore	20	20	1995.7	8														1			1
1	Miniopteridae	Yangochiroptera	Miniopterus tristis	1				1		Unknown	Least Concern	Least Concern	Non Endemic	Land bridges	Islandic	Indomalayan	Indomalayan	Indomalayan	Insectivore	247	247	1995.7	15.8			1								1
1	Molossidae	Yangochiroptera	Molossops temminckii	1						Unknown	Least Concern	Least Concern	Non Endemic	Mainland	Non-islandic	Neotropic	Neotropic	Neotropic	Insectivore	1347	1347	1427.91	5.9
1	Molossidae	Yangochiroptera	Molossus bondae	1	1					Stable	Least Concern	Least Concern	Non Endemic	Mainland	Non-islandic	Neotropic	Neotropic	Neotropic	Insectivore	165	165	1427.91	17.8														1			1
1	Molossidae	Yangochiroptera	Molossus molossus	1						Unknown	Least Concern	Least Concern	Non Endemic	Mainland	Non-islandic	Neotropic	Neotropic	Neotropic	Insectivore	1941	1941	1427.91	13.6
1	Molossidae	Yangochiroptera	Molossus pretiosus	1				1		Unknown	Least Concern	Least Concern	Non Endemic	Mainland	Non-islandic	Neotropic	Neotropic	Neotropic	Insectivore	278	278	1427.91	27
1	Molossidae	Yangochiroptera	Molossus sinaloae	1				1		Stable	Least Concern	Least Concern	Non Endemic	Mainland	Non-islandic	Neotropic	Neotropic	Neotropic	Insectivore	336	336	1427.91	22.6
1	Phyllostomidae	Yangochiroptera	Monophyllus plethodon					1		Unknown	Least Concern	Least Concern	Non Endemic	Small-ranging islands	Islandic	Neotropic	Neotropic	Neotropic	Omnivore	14	14	2064.28	14.8	1		1								2
1	Phyllostomidae	Yangochiroptera	Monophyllus redmani					1		Stable	Least Concern	Least Concern	Non Endemic	Small-ranging islands	Islandic	Neotropic	Neotropic	Neotropic	Omnivore	64	64	2064.28	8.7	1		1								2
1	Molossidae	Yangochiroptera	Mops bakarii	1						Unknown	Data Deficient	Data Deficient	Endemic	Small-ranging islands	Islandic	Afrotropic	Afrotropic	Afrotropic	Insectivore	55	55	2070.53	17.5
1	Molossidae	Yangochiroptera	Mops leucostigma	1				1		Unknown	Least Concern	Least Concern	Endemic	Small-ranging islands	Islandic	Afrotropic	Afrotropic	Afrotropic	Insectivore	55	55	2070.53	17.5							1	1			2
1	Mormoopidae	Yangochiroptera	Mormoops blainvillii	1				1		Unknown	Least Concern	Least Concern	Non Endemic	Small-ranging islands	Islandic	Neotropic	Neotropic	Neotropic	Insectivore	57	57	2070.53	8.6	1			1							2		1				1
1	Mormoopidae	Yangochiroptera	Mormoops megalophylla	1				1		Decreasing	Least Concern	Least Concern	Non Endemic	Mainland	Non-islandic	Neotropic	Neotropic	Neotropic	Insectivore	554	554	1888.07	15.8			1		1						2									1						1
1	Molossidae	Yangochiroptera	Mormopterus acetabulosus	1				1		Decreasing	Endangered	Endangered	Endemic	Mainland	Non-islandic	Afrotropic	Afrotropic	Afrotropic	Insectivore	4	2	1427.91	14.1													1		1		2
1	Mormoopidae	Yangochiroptera	Mormopterus beccarii	1	1			1		Unknown	Least Concern	Least Concern	Endemic	Mainland	Non-islandic	Indomalayan to Oceania	Indomalayan	Cosmopolitan	Insectivore	555	555	1427.91	14.9	1										1	1		1			2			1						1
1	Mormoopidae	Yangochiroptera	Mormopterus beccarii	1	1			1		Unknown	Least Concern	Least Concern	Endemic	Mainland	Non-islandic	Indomalayan to Oceania	Oceania	Cosmopolitan	Insectivore	555	555	1427.91	14.9	1										1	1		1			2			1						1
1	Molossidae	Yangochiroptera	Mormopterus francoismoutoui							Increasing	Least Concern	Least Concern	Endemic	Small-ranging islands	Islandic	Afrotropic	Afrotropic	Afrotropic	Insectivore	4	2	1427.91	14.1
1	Molossidae	Yangochiroptera	Mormopterus jugularis	1				1		Unknown	Least Concern	Least Concern	Endemic	Small-ranging islands	Islandic	Afrotropic	Afrotropic	Afrotropic	Insectivore	50	50	1427.91	11.5							1	1			2
1	Molossidae	Yangochiroptera	Mormopterus loriae	1						Stable	Least Concern	Least Concern	Non Endemic	Mainland	Non-islandic	Oceania	Oceania	Oceania	Insectivore	102	102	1427.91	8.9
1	Molossidae	Yangochiroptera	Mormopterus phrudus	1				1		Unknown	Vulnerable	Vulnerable	Endemic	Mainland	Non-islandic	Neotropic	Neotropic	Neotropic	Insectivore	2	2	1427.91	9.3														1						1
1	Emballonuridae	Yangochiroptera	Mosia nigrescens	1				1		Unknown	Least Concern	Least Concern	Endemic	Land bridges	Islandic	Indomalayan to Oceania	Indomalayan	Cosmopolitan	Insectivore	268	268	894.25	3.3
1	Emballonuridae	Yangochiroptera	Mosia nigrescens	1				1		Unknown	Least Concern	Least Concern	Endemic	Land bridges	Islandic	Indomalayan to Oceania	Oceania	Cosmopolitan	Insectivore	268	268	894.25	3.3
1	Vespertilionidae	Yangochiroptera	Murina aurata	1						Unknown	Least Concern	Least Concern	Non Endemic	Mainland	Non-islandic	Indomalayan	Indomalayan	Indomalayan	Insectivore	80	80	1825	7.3														1			1
1	Vespertilionidae	Yangochiroptera	Murina chrysochaetes	1				1		Unknown	Data Deficient	Data Deficient	Endemic	Mainland	Non-islandic	Indomalayan	Indomalayan	Indomalayan	Insectivore	1	1	1825	9
1	Vespertilionidae	Yangochiroptera	Murina cyclotis	1				1		Unknown	Least Concern	Least Concern	Non Endemic	Mainland	Non-islandic	Indomalayan	Indomalayan	Indomalayan	Insectivore	361	361	1825	9.3												1		1			2
1	Vespertilionidae	Yangochiroptera	Murina eleryi	1				1		Unknown	Data Deficient	Data Deficient	Endemic	Mainland	Non-islandic	Indomalayan	Indomalayan	Indomalayan	Insectivore	1	1	1825	4.3
1	Vespertilionidae	Yangochiroptera	Murina fanjingshanensis	1				1		Unknown	Data Deficient	Data Deficient	Endemic	Mainland	Non-islandic	Indomalayan	Indomalayan	Indomalayan	Insectivore	1	1	1825	9
1	Vespertilionidae	Yangochiroptera	Murina florium	1				1		Unknown	Least Concern	Least Concern	Non Endemic	Mainland	Non-islandic	Indomalayan to Oceania	Indomalayan	Cosmopolitan	Insectivore	84	84	1825	4.3												1					1		1							1
1	Vespertilionidae	Yangochiroptera	Murina florium	1				1		Unknown	Least Concern	Least Concern	Non Endemic	Mainland	Non-islandic	Indomalayan to Oceania	Oceania	Cosmopolitan	Insectivore	84	84	1825	4.3												1					1		1							1
1	Vespertilionidae	Yangochiroptera	Murina fusca	1				1		Unknown	Data Deficient	Data Deficient	Endemic	Small-ranging islands	Islandic	Indomalayan	Indomalayan	Indomalayan	Insectivore	1	1	1825	6.8
1	Vespertilionidae	Yangochiroptera	Murina gracilis	1						Unknown	Least Concern	Least Concern	Endemic	Mainland	Non-islandic	Indomalayan	Indomalayan	Indomalayan	Insectivore	1	1	1825	8.1														1			1				1			1	1	3
1	Vespertilionidae	Yangochiroptera	Murina harrisoni	1						Unknown	Least Concern	Least Concern	Endemic	Mainland	Non-islandic	Indomalayan	Indomalayan	Indomalayan	Insectivore	20	20	1825	4.3
1	Vespertilionidae	Yangochiroptera	Murina hilgendorfi	1				1		Unknown	Least Concern	Least Concern	Non Endemic	Mainland	Non-islandic	Indomalayan to Paleartic	Indomalayan	Cosmopolitan	Insectivore	516	516	1825	8.1														1			1
1	Vespertilionidae	Yangochiroptera	Murina hilgendorfi	1				1		Unknown	Least Concern	Least Concern	Non Endemic	Mainland	Non-islandic	Indomalayan to Paleartic	Palearctic	Cosmopolitan	Insectivore	516	516	1825	8.1														1			1
1	Vespertilionidae	Yangochiroptera	Murina huttoni	1						Unknown	Least Concern	Least Concern	Non Endemic	Mainland	Non-islandic	Indomalayan to Paleartic	Indomalayan	Cosmopolitan	Insectivore	87	87	1825	7.6														1			1
1	Vespertilionidae	Yangochiroptera	Murina huttoni	1						Unknown	Least Concern	Least Concern	Non Endemic	Mainland	Non-islandic	Indomalayan to Paleartic	Palearctic	Cosmopolitan	Insectivore	87	87	1825	7.6														1			1
1	Vespertilionidae	Yangochiroptera	Murina leucogaster	1						Unknown	Least Concern	Least Concern	Non Endemic	Land bridges	Islandic	Indomalayan to Paleartic	Indomalayan	Cosmopolitan	Insectivore	10	10	1825	8.3														1			1
1	Vespertilionidae	Yangochiroptera	Murina leucogaster	1						Unknown	Least Concern	Least Concern	Non Endemic	Land bridges	Islandic	Indomalayan to Paleartic	Palearctic	Cosmopolitan	Insectivore	237	237	1825	7.6														1			1
1	Vespertilionidae	Yangochiroptera	Murina puta	1						Unknown	Near Threatened	Near Threatened	Endemic	Land bridges	Islandic	Palearctic	Palearctic	Palearctic	Insectivore	10	10	1825	8.3														1			1
1	Vespertilionidae	Yangochiroptera	Murina shuipuensis	1				1		Unknown	Data Deficient	Data Deficient	Endemic	Mainland	Non-islandic	Indomalayan	Indomalayan	Indomalayan	Insectivore	1	1	1825	9
1	Vespertilionidae	Yangochiroptera	Murina tenebrosa					1		Unknown	Endangered	Endangered	Endemic	Small-ranging islands	Islandic	Palearctic	Palearctic	Palearctic	Insectivore	2	3	1825	3.7			1								1	1					1
1	Vespertilionidae	Yangochiroptera	Murina ussuriensis	1				1		Unknown	Least Concern	Least Concern	Non Endemic	Mainland	Non-islandic	Palearctic	Palearctic	Palearctic	Insectivore	93	93	1825	5.3														1			1
1	Phyllostomidae	Yangochiroptera	Musonycteris harrisoni	1				1		Decreasing	Vulnerable	Vulnerable	Endemic	Mainland	Non-islandic	Neotropic	Neotropic	Neotropic	Omnivore	17	17	2064.28	11.8												1		1			2			1						1
1	Pteropodidae	Yinpterochiroptera	Myonycteris angolensis	1				1		Decreasing	Least Concern	Least Concern	Non Endemic	Mainland	Non-islandic	Afrotropic	Afrotropic	Afrotropic	Frugivore	1103	1103	1553.79	74.6			1	1	1		1				4			1			1
1	Vespertilionidae	Yangochiroptera	Myotis adversus	1				1	1	Unknown	Least Concern	Least Concern	Non Endemic	Mainland	Non-islandic	Palearctic to Oceania	Palearctic	Cosmopolitan	Insectivore	79	79	2504.39	10.6												1		1			2			1						1
1	Vespertilionidae	Yangochiroptera	Myotis adversus	1				1	1	Unknown	Least Concern	Least Concern	Non Endemic	Mainland	Non-islandic	Palearctic to Oceania	Oceania	Cosmopolitan	Insectivore	79	79	2504.39	10.6												1		1			2			1						1
1	Vespertilionidae	Yangochiroptera	Myotis altarium					1		Unknown	Least Concern	Least Concern	Non Endemic	Mainland	Non-islandic	Indomalayan to Paleartic	Indomalayan	Cosmopolitan	Insectivore	213	213	2504.39	11
1	Vespertilionidae	Yangochiroptera	Myotis altarium					1		Unknown	Least Concern	Least Concern	Non Endemic	Mainland	Non-islandic	Indomalayan to Paleartic	Palearctic	Cosmopolitan	Insectivore	213	213	2504.39	11
1	Vespertilionidae	Yangochiroptera	Myotis annectans	1						Unknown	Least Concern	Least Concern	Non Endemic	Mainland	Non-islandic	Indomalayan	Indomalayan	Indomalayan	Insectivore	62	62	2106.63	9.8
1	Vespertilionidae	Yangochiroptera	Myotis atacamensis			1				Unknown	Endangered	Endangered	Non Endemic	Mainland	Non-islandic	Neotropic	Neotropic	Neotropic	Insectivore	63	63	2106.63	7.1	1										1	1	1				2
1	Vespertilionidae	Yangochiroptera	Myotis aurascens	1				1		Stable	Least Concern	Least Concern	Non Endemic	Mainland	Non-islandic	Palearctic	Palearctic	Palearctic	Insectivore	379	379	2106.63	7.5			1								1		1				1
1	Vespertilionidae	Yangochiroptera	Myotis auriculus	1		1		1		Unknown	Least Concern	Least Concern	Non Endemic	Mainland	Non-islandic	Nearctic to Neotropic	Nearctic	Cosmopolitan	Insectivore	129	129	2504.39	5
1	Vespertilionidae	Yangochiroptera	Myotis auriculus	1		1		1		Unknown	Least Concern	Least Concern	Non Endemic	Mainland	Non-islandic	Nearctic to Neotropic	Neotropic	Cosmopolitan	Insectivore	129	129	2504.39	5
1	Vespertilionidae	Yangochiroptera	Myotis austroriparius	1				1		Stable	Least Concern	Least Concern	Endemic	Mainland	Non-islandic	Nearctic	Nearctic	Nearctic	Insectivore	128	128	892.475	6.8	1		1					1	1	1			1	1
1	Vespertilionidae	Yangochiroptera	Myotis badius					1		Unknown	Data Deficient	Data Deficient	Endemic	Mainland	Non-islandic	Indomalayan	Indomalayan	Indomalayan	Insectivore	1	1	1825	7
1	Vespertilionidae	Yangochiroptera	Myotis bechsteinii	1				1		Decreasing	Near Threatened	Near Threatened	Non Endemic	Mainland	Non-islandic	Palearctic	Palearctic	Palearctic	Insectivore	430	430	1825	8.5			1								1	1	1	1	1		4
1	Vespertilionidae	Yangochiroptera	Myotis blythii					1		Decreasing	Least Concern	Least Concern	Non Endemic	Mainland	Non-islandic	Palearctic	Palearctic	Palearctic	Insectivore	935	935	2555	22.5			1								1	1			1		2			1						1
1	Vespertilionidae	Yangochiroptera	Myotis bombinus	1				1		Decreasing	Near Threatened	Near Threatened	Non Endemic	Mainland	Non-islandic	Palearctic to Neartic	Palearctic	Cosmopolitan	Insectivore	269	269	2106.63	6.9												1		1			2
1	Vespertilionidae	Yangochiroptera	Myotis bombinus	1				1		Decreasing	Near Threatened	Near Threatened	Non Endemic	Mainland	Non-islandic	Palearctic to Neartic	Nearctic	Cosmopolitan	Insectivore	269	269	2106.63	6.9												1		1			2
1	Vespertilionidae	Yangochiroptera	Myotis borneoensis	1						Unknown	Data Deficient	Data Deficient	Endemic	Mainland	Non-islandic	Indomalayan	Indomalayan	Indomalayan	Insectivore	161	161	2106.63	8.3			1	1	1						3			1			1
1	Vespertilionidae	Yangochiroptera	Myotis brandtii	1				1		Stable	Least Concern	Least Concern	Non Endemic	Mainland	Non-islandic	Palearctic	Palearctic	Palearctic	Insectivore	1085	1085	2106.63	5.3													1	1	1		3
1	Vespertilionidae	Yangochiroptera	Myotis bucharensis					1		Unknown	Data Deficient	Data Deficient	Non Endemic	Mainland	Non-islandic	Palearctic	Palearctic	Palearctic	Insectivore	34	34	2106.63	7.9
1	Vespertilionidae	Yangochiroptera	Myotis californicus	1		1		1		Unknown	Least Concern	Least Concern	Non Endemic	Mainland	Non-islandic	Nearctic to Neotropic	Nearctic	Cosmopolitan	Insectivore	555	555	2106.63	4.6
1	Vespertilionidae	Yangochiroptera	Myotis californicus	1		1		1		Unknown	Least Concern	Least Concern	Non Endemic	Mainland	Non-islandic	Nearctic to Neotropic	Neotropic	Cosmopolitan	Insectivore	555	555	2106.63	4.6
1	Vespertilionidae	Yangochiroptera	Myotis capaccinii					1	1	Decreasing	Vulnerable	Vulnerable	Non Endemic	Mainland	Non-islandic	Palearctic	Palearctic	Palearctic	Insectivore	294	355	2190	7.4			1		1		1				3				1		1			1	1					2
1	Vespertilionidae	Yangochiroptera	Myotis chinensis	1				1	1	Unknown	Least Concern	Least Concern	Non Endemic	Mainland	Non-islandic	Palearctic to Neartic	Palearctic	Cosmopolitan	Insectivore	295	295	2504.39	42
1	Vespertilionidae	Yangochiroptera	Myotis chinensis	1				1	1	Unknown	Least Concern	Least Concern	Non Endemic	Mainland	Non-islandic	Palearctic to Neartic	Nearctic	Cosmopolitan	Insectivore	295	295	2504.39	42
1	Vespertilionidae	Yangochiroptera	Myotis ciliolabrum	1		1		1		Stable	Least Concern	Least Concern	Non Endemic	Mainland	Non-islandic	Nearctic	Nearctic	Nearctic	Insectivore	195	195	2106.63	4.9
1	Vespertilionidae	Yangochiroptera	Myotis csorbai	1						Unknown	Data Deficient	Data Deficient	Endemic	Mainland	Non-islandic	Indomalayan	Indomalayan	Indomalayan	Insectivore	10	10	2106.63	7	1										1	1		1			2
1	Vespertilionidae	Yangochiroptera	Myotis dasycneme	1				1	1	Decreasing	Near Threatened	Near Threatened	Non Endemic	Mainland	Non-islandic	Palearctic	Palearctic	Palearctic	Insectivore	773	773	1825	14.1													1		1		2
1	Vespertilionidae	Yangochiroptera	Myotis daubentonii	1				1	1	Increasing	Least Concern	Least Concern	Non Endemic	Mainland	Non-islandic	Palearctic	Palearctic	Palearctic	Insectivore	1972	1972	3298.5	7.4			1								1				1		1				1					1
1	Vespertilionidae	Yangochiroptera	Myotis davidii							Unknown	Least Concern	Least Concern	Endemic	Mainland	Non-islandic	Palearctic	Palearctic	Palearctic	Insectivore	30	30	2106.63	5.3
1	Vespertilionidae	Yangochiroptera	Myotis dieteri	1				1		Unknown	Data Deficient	Data Deficient	Endemic	Mainland	Non-islandic	Afrotropic	Afrotropic	Afrotropic	Insectivore	2	2	2106.63	7.5
1	Vespertilionidae	Yangochiroptera	Myotis dominicensis					1	1	Unknown	Vulnerable	Vulnerable	Endemic	Small-ranging islands	Islandic	Neotropic	Neotropic	Neotropic	Insectivore	3	3	2106.63	3.2			1		1						2	1	1	1			3							1	1	2
1	Vespertilionidae	Yangochiroptera	Myotis emarginatus					1		Stable	Least Concern	Least Concern	Non Endemic	Mainland	Non-islandic	Palearctic	Palearctic	Palearctic	Insectivore	747	747	2542.77	7.7					1		1				2	1	1		1		3			1						1
1	Vespertilionidae	Yangochiroptera	Myotis escalerai	1						Unknown	Least Concern	Least Concern	Non Endemic	Mainland	Non-islandic	Palearctic	Palearctic	Palearctic	Insectivore	936	936	2542.77	7.1													1			1	2
1	Vespertilionidae	Yangochiroptera	Myotis evotis	1				1		Stable	Least Concern	Least Concern	Non Endemic	Mainland	Non-islandic	Nearctic	Nearctic	Nearctic	Insectivore	408	408	2106.63	6.7	1										1			1			1
1	Vespertilionidae	Yangochiroptera	Myotis federatus	1						Unknown	Data Deficient	Data Deficient	Endemic	Mainland	Non-islandic	Indomalayan	Indomalayan	Indomalayan	Insectivore	161	161	2106.63	8.3			1		1						2
1	Vespertilionidae	Yangochiroptera	Myotis fimbriatus					1		Unknown	Least Concern	Least Concern	Endemic	Mainland	Non-islandic	Indomalayan	Indomalayan	Indomalayan	Insectivore	58	58	2106.63	7.6
1	Vespertilionidae	Yangochiroptera	Myotis findleyi	1					1	Decreasing	Endangered	Endangered	Endemic	Small-ranging islands	Islandic	Neotropic	Neotropic	Neotropic	Insectivore	1	1	2106.63	4.2												1	1	1			3		1					1	1	3
1	Vespertilionidae	Yangochiroptera	Myotis formosus	1				1		Unknown	Least Concern	Least Concern	Non Endemic	Mainland	Non-islandic	Indomalayan to Paleartic	Indomalayan	Cosmopolitan	Insectivore	412	412	2106.63	7												1		1			2
1	Vespertilionidae	Yangochiroptera	Myotis formosus	1				1		Unknown	Least Concern	Least Concern	Non Endemic	Mainland	Non-islandic	Indomalayan to Paleartic	Palearctic	Cosmopolitan	Insectivore	412	412	2106.63	7												1		1			2
1	Vespertilionidae	Yangochiroptera	Myotis fortidens	1				1		Unknown	Least Concern	Least Concern	Endemic	Mainland	Non-islandic	Neotropic	Neotropic	Neotropic	Insectivore	110	110	2106.63	4.4
1	Vespertilionidae	Yangochiroptera	Myotis frater	1				1		Unknown	Data Deficient	Data Deficient	Non Endemic	Mainland	Non-islandic	Palearctic	Palearctic	Palearctic	Insectivore	261	321	2106.63	7.6														1			1
1	Vespertilionidae	Yangochiroptera	Myotis gomantongensis					1		Unknown	Least Concern	Least Concern	Endemic	Land bridges	Islandic	Indomalayan	Indomalayan	Indomalayan	Insectivore	108	108	2106.63	9.4	1		1	1	1						4
1	Vespertilionidae	Yangochiroptera	Myotis goudoti	1				1		Unknown	Least Concern	Least Concern	Endemic	Small-ranging islands	Islandic	Afrotropic	Afrotropic	Afrotropic	Insectivore	81	81	2106.63	7	1		1	1	1						4			1			1
1	Vespertilionidae	Yangochiroptera	Myotis grisescens	1				1		Increasing	Near Threatened	Near Threatened	Endemic	Mainland	Non-islandic	Nearctic	Nearctic	Nearctic	Insectivore	118	118	3469.93	10.5	1		1						1		3			1	1		2
1	Vespertilionidae	Yangochiroptera	Myotis hajastanicus					1		Unknown	Critically Endangered	Critically Endangered	Endemic	Mainland	Non-islandic	Palearctic	Palearctic	Palearctic	Insectivore	3	3	2106.63	6.8	1		1								2
1	Vespertilionidae	Yangochiroptera	Myotis hasseltii	1				1		Unknown	Least Concern	Least Concern	Non Endemic	Mainland	Non-islandic	Indomalayan	Indomalayan	Indomalayan	Insectivore	193	193	2106.63	8.8												1	1	1			3
1	Vespertilionidae	Yangochiroptera	Myotis horsfieldii	1				1		Stable	Least Concern	Least Concern	Non Endemic	Mainland	Non-islandic	Indomalayan	Indomalayan	Indomalayan	Insectivore	457	457	2106.63	6.3			1	1							2	1		1			2
1	Vespertilionidae	Yangochiroptera	Myotis ikonnikovi	1				1	1	Unknown	Least Concern	Least Concern	Non Endemic	Mainland	Non-islandic	Palearctic	Palearctic	Palearctic	Insectivore	284	284	2106.63	3.7														1			1
1	Vespertilionidae	Yangochiroptera	Myotis indochinensis	1				1		Unknown	Data Deficient	Data Deficient	Non Endemic	Mainland	Non-islandic	Indomalayan	Indomalayan	Indomalayan	Insectivore	161	161	2106.63	8.3			1											1			1
1	Vespertilionidae	Yangochiroptera	Myotis izecksohni	1						Unknown	Data Deficient	Data Deficient	Endemic	Mainland	Non-islandic	Neotropic	Neotropic	Neotropic	Insectivore	1	1	2106.63	6.3
1	Vespertilionidae	Yangochiroptera	Myotis keaysi	1						Unknown	Least Concern	Least Concern	Non Endemic	Mainland	Non-islandic	Neotropic	Neotropic	Neotropic	Insectivore	443	443	2106.63	5.3
1	Vespertilionidae	Yangochiroptera	Myotis keenii	1						Stable	Least Concern	Least Concern	Endemic	Mainland	Non-islandic	Nearctic	Nearctic	Nearctic	Insectivore	37	37	2106.63	6.3	1		1								2		1	1	1		3
1	Vespertilionidae	Yangochiroptera	Myotis laniger	1				1		Unknown	Least Concern	Least Concern	Non Endemic	Mainland	Non-islandic	Indomalayan to Paleartic	Indomalayan	Cosmopolitan	Insectivore	298	298	2106.63	3.7
1	Vespertilionidae	Yangochiroptera	Myotis laniger	1				1		Unknown	Least Concern	Least Concern	Non Endemic	Mainland	Non-islandic	Indomalayan to Paleartic	Palearctic	Cosmopolitan	Insectivore	298	298	2106.63	3.7
1	Vespertilionidae	Yangochiroptera	Myotis lavali	1						Unknown	Least Concern	Least Concern	Non Endemic	Mainland	Non-islandic	Neotropic	Neotropic	Neotropic	Insectivore	1708	1708	2106.63	4.2
1	Vespertilionidae	Yangochiroptera	Myotis leibii	1				1		Stable	Least Concern	Least Concern	Non Endemic	Mainland	Non-islandic	Nearctic	Nearctic	Nearctic	Insectivore	211	211	2106.63	5.1			1		1				1	1	4	1	1	1			3						1			1
1	Vespertilionidae	Yangochiroptera	Myotis levis	1				1		Unknown	Least Concern	Least Concern	Non Endemic	Mainland	Non-islandic	Neotropic	Neotropic	Neotropic	Insectivore	192	192	2106.63	5.5
1	Vespertilionidae	Yangochiroptera	Myotis longipes	1				1		Unknown	Data Deficient	Data Deficient	Non Endemic	Mainland	Non-islandic	Indomalayan	Indomalayan	Indomalayan	Insectivore	30	64	2106.63	7.5			1								1
1	Vespertilionidae	Yangochiroptera	Myotis lucifugus	1				1		Stable	Least Concern	Least Concern	Non Endemic	Mainland	Non-islandic	Nearctic to Neotropic	Nearctic	Cosmopolitan	Insectivore	1509	1509	4117.2	7.6								1			1
1	Vespertilionidae	Yangochiroptera	Myotis lucifugus	1				1		Stable	Least Concern	Least Concern	Non Endemic	Mainland	Non-islandic	Nearctic to Neotropic	Neotropic	Cosmopolitan	Insectivore	1509	1509	4117.2	7.6								1			1
1	Vespertilionidae	Yangochiroptera	Myotis macrodactylus	1				1	1	Unknown	Least Concern	Least Concern	Non Endemic	Mainland	Non-islandic	Palearctic	Palearctic	Palearctic	Insectivore	146	146	2106.63	7.2
1	Vespertilionidae	Yangochiroptera	Myotis macropus					1	1	Unknown	Least Concern	Least Concern	Non Endemic	Mainland	Non-islandic	Oceania	Oceania	Oceania	Insectivore	255	255	2106.63	10			1								1				1		1
1	Vespertilionidae	Yangochiroptera	Myotis macrotarsus					1		Decreasing	Near Threatened	Near Threatened	Non Endemic	Land bridges	Islandic	Indomalayan	Indomalayan	Indomalayan	Insectivore	92	92	1825	12.5	1		1	1	1						4
1	Vespertilionidae	Yangochiroptera	Myotis martiniquensis	1				1		Unknown	Near Threatened	Near Threatened	Non Endemic	Small-ranging islands	Islandic	Neotropic	Neotropic	Neotropic	Insectivore	8	8	2106.63	5			1								1													1	1	2
1	Vespertilionidae	Yangochiroptera	Myotis melanorhinus	1				1		Stable	Least Concern	Least Concern	Non Endemic	Mainland	Non-islandic	Nearctic	Nearctic	Nearctic	Insectivore	426	426	2106.63	5.9
1	Vespertilionidae	Yangochiroptera	Myotis moluccarum	1				1	1	Unknown	Least Concern	Least Concern	Endemic	Land bridges	Islandic	Indomalayan	Indomalayan	Indomalayan	Insectivore	197	197	2106.63	9.2
1	Vespertilionidae	Yangochiroptera	Myotis montivagus	1				1		Unknown	Least Concern	Least Concern	Non Endemic	Mainland	Non-islandic	Indomalayan	Indomalayan	Indomalayan	Insectivore	161	161	2106.63	8.3			1								1		1				1
1	Vespertilionidae	Yangochiroptera	Myotis morrisi		1			1		Unknown	Data Deficient	Data Deficient	Non Endemic	Mainland	Non-islandic	Afrotropic	Afrotropic	Afrotropic	Insectivore	2	2	2106.63	7.7			1	1	1		1				4
1	Vespertilionidae	Yangochiroptera	Myotis muricola	1				1		Stable	Least Concern	Least Concern	Non Endemic	Mainland	Non-islandic	Indomalayan to Paleartic	Indomalayan	Cosmopolitan	Insectivore	785	785	2106.63	4.1	1									1	2	1		1		1	3
1	Vespertilionidae	Yangochiroptera	Myotis muricola	1				1		Stable	Least Concern	Least Concern	Non Endemic	Mainland	Non-islandic	Indomalayan to Paleartic	Palearctic	Cosmopolitan	Insectivore	785	785	2106.63	4.1	1									1	2	1		1		1	3
1	Vespertilionidae	Yangochiroptera	Myotis myotis	1				1		Stable	Least Concern	Least Concern	Non Endemic	Mainland	Non-islandic	Palearctic	Palearctic	Palearctic	Insectivore	546	546	2847	34			1								1		1		1		2
1	Vespertilionidae	Yangochiroptera	Myotis mystacinus	1				1		Unknown	Least Concern	Least Concern	Non Endemic	Mainland	Non-islandic	Palearctic	Palearctic	Palearctic	Insectivore	763	763	2864.16	6			1		1		1				3			1		1	2			1						1
1	Vespertilionidae	Yangochiroptera	Myotis nattereri	1				1	1	Stable	Least Concern	Least Concern	Non Endemic	Mainland	Non-islandic	Palearctic	Palearctic	Palearctic	Insectivore	936	936	2106.63	7.1					1		1				2									1						1
1	Vespertilionidae	Yangochiroptera	Myotis nesopolus	1						Unknown	Least Concern	Least Concern	Non Endemic	Mainland	Non-islandic	Neotropic	Neotropic	Neotropic	Insectivore	19	19	2106.63	3.5												1	1				2
1	Vespertilionidae	Yangochiroptera	Myotis nigricans	1	1			1	1	Stable	Least Concern	Least Concern	Non Endemic	Mainland	Non-islandic	Neotropic	Neotropic	Neotropic	Insectivore	1708	1708	810.53	4.2
1	Vespertilionidae	Yangochiroptera	Myotis nipalensis	1		1		1		Unknown	Least Concern	Least Concern	Non Endemic	Mainland	Non-islandic	Palearctic	Palearctic	Palearctic	Insectivore	656	656	2106.63	6.3			1	1	1						3
1	Vespertilionidae	Yangochiroptera	Myotis nyctor	1				1		Unknown	Vulnerable	Vulnerable	Non Endemic	Small-ranging islands	Islandic	Neotropic	Neotropic	Neotropic	Insectivore	3	3	2106.63	5												1					1							1	1	2
1	Vespertilionidae	Yangochiroptera	Myotis peninsularis	1				1		Decreasing	Endangered	Endangered	Endemic	Mainland	Non-islandic	Neotropic	Neotropic	Neotropic	Insectivore	4	4	2106.63	7													1	1			2
1	Vespertilionidae	Yangochiroptera	Myotis pequinius	1				1		Unknown	Least Concern	Least Concern	Endemic	Mainland	Non-islandic	Palearctic	Palearctic	Palearctic	Insectivore	81	81	2106.63	17.1
1	Vespertilionidae	Yangochiroptera	Myotis petax	1					1	Unknown	Data Deficient	Data Deficient	Endemic	Mainland	Non-islandic	Palearctic	Palearctic	Palearctic	Insectivore	1	1	1825	11
1	Vespertilionidae	Yangochiroptera	Myotis peytoni	1						Unknown	Data Deficient	Data Deficient	Endemic	Mainland	Non-islandic	Indomalayan	Indomalayan	Indomalayan	Insectivore	1972	1972	1825	7.4	1		1	1	1						4
1	Vespertilionidae	Yangochiroptera	Myotis pilosus	1					1	Decreasing	Near Threatened	Near Threatened	Endemic	Mainland	Non-islandic	Indomalayan to Paleartic	Indomalayan	Cosmopolitan	Insectivore	162	162	1825	15.6							1				1				1		1
1	Vespertilionidae	Yangochiroptera	Myotis pilosus	1					1	Decreasing	Near Threatened	Near Threatened	Endemic	Mainland	Non-islandic	Indomalayan to Paleartic	Palearctic	Cosmopolitan	Insectivore	162	162	1825	15.6							1				1				1		1
1	Vespertilionidae	Yangochiroptera	Myotis pruinosus	1				1		Unknown	Endangered	Endangered	Endemic	Small-ranging islands	Islandic	Palearctic	Palearctic	Palearctic	Insectivore	15	34	2106.63	2.7												1	1	1
1	Vespertilionidae	Yangochiroptera	Myotis punicus	1				1		Unknown	Data Deficient	Data Deficient	Non Endemic	Mainland	Non-islandic	Palearctic	Palearctic	Palearctic	Insectivore	117	117	2106.63	23.5					1						1									1						1
1	Vespertilionidae	Yangochiroptera	Myotis ridleyi	1				1	1	Decreasing	Near Threatened	Near Threatened	Non Endemic	Mainland	Non-islandic	Indomalayan	Indomalayan	Indomalayan	Insectivore	136	136	1825	4.5												1		1			2			1						1
1	Vespertilionidae	Yangochiroptera	Myotis riparius	1	1			1	1	Stable	Least Concern	Least Concern	Non Endemic	Mainland	Non-islandic	Neotropic	Neotropic	Neotropic	Insectivore	1666	1666	2106.63	5.6
1	Vespertilionidae	Yangochiroptera	Myotis rufoniger					1		Unknown	Data Deficient	Data Deficient	Non Endemic	Mainland	Non-islandic	Palearctic	Palearctic	Palearctic	Insectivore	412	412	2106.63	7
1	Vespertilionidae	Yangochiroptera	Myotis schaubi	1				1		Unknown	Data Deficient	Data Deficient	Endemic	Mainland	Non-islandic	Palearctic	Palearctic	Palearctic	Insectivore	29	45	2106.63	8	1		1	1	1						4		1	1			2
1	Vespertilionidae	Yangochiroptera	Myotis septentrionalis	1				1		Stable	Least Concern	Least Concern	Endemic	Mainland	Non-islandic	Nearctic	Nearctic	Nearctic	Insectivore	239	239	2106.63	2.7			1								1			1	1		2
1	Vespertilionidae	Yangochiroptera	Myotis sibiricus	1	1			1		Decreasing	Least Concern	Least Concern	Non Endemic	Mainland	Non-islandic	Palearctic	Palearctic	Palearctic	Insectivore	1085	1085	2106.63	5.3			1										1	1						1
1	Vespertilionidae	Yangochiroptera	Myotis siligorensis	1				1		Unknown	Least Concern	Least Concern	Non Endemic	Mainland	Non-islandic	Indomalayan	Indomalayan	Indomalayan	Insectivore	679	679	2106.63	7.5												1		1			2
1	Vespertilionidae	Yangochiroptera	Myotis sodalis	1				1		Stable	Near Threatened	Near Threatened	Endemic	Mainland	Non-islandic	Nearctic	Nearctic	Nearctic	Insectivore	217	217	2106.63	6.9			1		1					1	3	1	1	1		1	4	1	1							2
1	Vespertilionidae	Yangochiroptera	Myotis stalkeri	1				1	1	Unknown	Data Deficient	Data Deficient	Endemic	Small-ranging islands	Islandic	Indomalayan	Indomalayan	Indomalayan	Insectivore	5	5	2106.63	17			1
1	Vespertilionidae	Yangochiroptera	Myotis thysanodes	1		1		1		Stable	Least Concern	Least Concern	Non Endemic	Mainland	Non-islandic	Nearctic	Nearctic	Nearctic	Insectivore	447	447	2106.63	8.1			1		1						2
1	Vespertilionidae	Yangochiroptera	Myotis tricolor	1	1					Unknown	Least Concern	Least Concern	Non Endemic	Mainland	Non-islandic	Neotropic	Neotropic	Neotropic	Insectivore	574	574	2504.39	13.9
1	Vespertilionidae	Yangochiroptera	Myotis velifer	1				1		Stable	Least Concern	Least Concern	Non Endemic	Mainland	Non-islandic	Nearctic to Neotropic	Nearctic	Cosmopolitan	Insectivore	285	285	1579.6	10.1	1		1								2
1	Vespertilionidae	Yangochiroptera	Myotis velifer	1				1		Stable	Least Concern	Least Concern	Non Endemic	Mainland	Non-islandic	Nearctic to Neotropic	Neotropic	Cosmopolitan	Insectivore	285	285	1579.6	10.1	1		1								2
1	Vespertilionidae	Yangochiroptera	Myotis vivesi					1		Decreasing	Vulnerable	Vulnerable	Endemic	Mainland	Non-islandic	Neotropic	Neotropic	Neotropic	Insectivore	625	625	2504.39	8.5													1				1		1					1	1	3
1	Vespertilionidae	Yangochiroptera	Myotis volans	1		1		1		Stable	Least Concern	Least Concern	Non Endemic	Mainland	Non-islandic	Nearctic	Nearctic	Nearctic	Insectivore	19	26	1509.31	25
1	Vespertilionidae	Yangochiroptera	Myotis welwitschii	1	1					Unknown	Least Concern	Least Concern	Non Endemic	Mainland	Non-islandic	Neotropic	Neotropic	Neotropic	Insectivore	551	551	2504.39	15.5
1	Vespertilionidae	Yangochiroptera	Myotis yumanensis	1				1		Stable	Least Concern	Least Concern	Non Endemic	Mainland	Non-islandic	Nearctic	Nearctic	Nearctic	Insectivore	533	533	2106.63	5.4
1	Mystacinidae	Yangochiroptera	Mystacina robusta	1				1		Unknown	Critically Endangered	Critically Endangered	Endemic	Small-ranging islands	Islandic	Oceania	Oceania	Oceania	Omnivore	0	62	1888.07	16.4																			1							1
1	Mystacinidae	Yangochiroptera	Mystacina tuberculata	1				1		Decreasing	Vulnerable	Vulnerable	Endemic	Small-ranging islands	Islandic	Oceania	Oceania	Oceania	Omnivore	21	63	1888.07	12.6													1		1		2		1							1
1	Myzopodidae	Yangochiroptera	Myzopoda aurita	1				1	1	Unknown	Least Concern	Least Concern	Endemic	Small-ranging islands	Islandic	Afrotropic	Afrotropic	Afrotropic	Insectivore	33	33	2070.53	9.3							1				1
1	Myzopodidae	Yangochiroptera	Myzopoda schliemanni	1				1		Unknown	Least Concern	Least Concern	Endemic	Small-ranging islands	Islandic	Afrotropic	Afrotropic	Afrotropic	Insectivore	10	10	2070.53	9.1														1			1
1	Natalidae	Yangochiroptera	Natalus espiritosantensis	1				1		Decreasing	Near Threatened	Near Threatened	Non Endemic	Mainland	Non-islandic	Neotropic	Neotropic	Neotropic	Insectivore	327	327	2070.53	6	1							1			2							1								1
1	Natalidae	Yangochiroptera	Natalus jamaicensis					1		Decreasing	Critically Endangered	Critically Endangered	Endemic	Small-ranging islands	Islandic	Neotropic	Neotropic	Neotropic	Insectivore	4	4	2070.53	6.7			1																1
1	Natalidae	Yangochiroptera	Natalus major	1				1		Decreasing	Near Threatened	Near Threatened	Non Endemic	Small-ranging islands	Islandic	Neotropic	Neotropic	Neotropic	Insectivore	22	22	2070.53	7.1	1			1							2
1	Natalidae	Yangochiroptera	Natalus mexicanus	1				1		Unknown	Least Concern	Least Concern	Non Endemic	Mainland	Non-islandic	Neotropic	Neotropic	Neotropic	Insectivore	367	367	2070.53	5.3	1		1								2
1	Natalidae	Yangochiroptera	Natalus primus					1		Decreasing	Vulnerable	Vulnerable	Endemic	Small-ranging islands	Islandic	Neotropic	Neotropic	Neotropic	Insectivore	2	32	2070.53	9.1	1		1								2									1						1
1	Natalidae	Yangochiroptera	Natalus stramineus	1				1		Unknown	Least Concern	Least Concern	Non Endemic	Small-ranging islands	Islandic	Neotropic	Neotropic	Neotropic	Insectivore	11	11	2070.53	5	1		1								2													1	1	2
1	Natalidae	Yangochiroptera	Natalus tumidirostris	1				1		Unknown	Least Concern	Least Concern	Non Endemic	Mainland	Non-islandic	Neotropic	Neotropic	Neotropic	Insectivore	202	202	2070.53	6.4	1				1						2
1	Noctolionidae	Yangochiroptera	Noctilio albiventris	1	1			1	1	Stable	Least Concern	Least Concern	Non Endemic	Mainland	Non-islandic	Neotropic	Neotropic	Neotropic	Carnivore	1523	1523	1888.07	30.8
1	Noctolionidae	Yangochiroptera	Noctilio leporinus	1	1			1	1	Unknown	Least Concern	Least Concern	Non Endemic	Mainland	Non-islandic	Neotropic	Neotropic	Neotropic	Carnivore	1823	1823	1888.07	58.3								1			1			1	1		2
1	Pteropodidae	Yinpterochiroptera	Notopteris macdonaldi	1				1		Decreasing	Vulnerable	Vulnerable	Endemic	Small-ranging islands	Islandic	Oceania	Oceania	Oceania	Frugivore	17	17	1553.79	65.1	1		1	1	1		1	1			6
1	Pteropodidae	Yinpterochiroptera	Notopteris neocaledonica	1				1		Unknown	Vulnerable	Vulnerable	Endemic	Small-ranging islands	Islandic	Oceania	Oceania	Oceania	Frugivore	6	6	1553.79	45.1			1	1			1				3
1	Vespertilionidae	Yangochiroptera	Nyctalus aviator	1						Decreasing	Near Threatened	Near Threatened	Non Endemic	Mainland	Non-islandic	Palearctic	Palearctic	Palearctic	Insectivore	152	152	1677.17	38.3														1			1
1	Vespertilionidae	Yangochiroptera	Nyctalus leisleri	1						Unknown	Least Concern	Least Concern	Non Endemic	Mainland	Non-islandic	Palearctic	Palearctic	Palearctic	Insectivore	798	798	1677.17	13.3														1			1
1	Vespertilionidae	Yangochiroptera	Nyctalus noctula	1				1	1	Unknown	Least Concern	Least Concern	Non Endemic	Mainland	Non-islandic	Palearctic	Palearctic	Palearctic	Insectivore	1043	1043	1529.35	28														1			1
1	Vespertilionidae	Yangochiroptera	Nyctalus plancyi	1				1		Unknown	Least Concern	Least Concern	Non Endemic	Mainland	Non-islandic	Palearctic	Palearctic	Palearctic	Insectivore	261	261	1677.17	24.1
1	Nycteridae	Yangochiroptera	Nycteris gambiensis	1	1			1		Unknown	Least Concern	Least Concern	Non Endemic	Mainland	Non-islandic	Afrotropic	Afrotropic	Afrotropic	Insectivore	239	239	1825	7												1					1
1	Nycteridae	Yangochiroptera	Nycteris grandis	1	1					Decreasing	Least Concern	Least Concern	Non Endemic	Mainland	Non-islandic	Afrotropic	Afrotropic	Afrotropic	Insectivore	594	594	1825	30.2							1				1			1			1
1	Nycteridae	Yangochiroptera	Nycteris hispida	1	1					Stable	Least Concern	Least Concern	Non Endemic	Mainland	Non-islandic	Afrotropic	Afrotropic	Afrotropic	Insectivore	1403	1403	1825	8.6												1					1
1	Nycteridae	Yangochiroptera	Nycteris javanica	1				1		Decreasing	Vulnerable	Vulnerable	Endemic	Land bridges	Islandic	Indomalayan	Indomalayan	Indomalayan	Insectivore	36	51	1825	17.7												1		1			2
1	Nycteridae	Yangochiroptera	Nycteris macrotis	1	1					Unknown	Least Concern	Least Concern	Non Endemic	Mainland	Non-islandic	Afrotropic	Afrotropic	Afrotropic	Insectivore	1450	1450	1825	14.5												1					1
1	Nycteridae	Yangochiroptera	Nycteris thebaica	1	1	1		1		Unknown	Least Concern	Least Concern	Non Endemic	Mainland	Non-islandic	Palearctic to Afrotropic	Palearctic	Cosmopolitan	Insectivore	1854	1854	1825	9.8	1		1	1	1						4
1	Nycteridae	Yangochiroptera	Nycteris thebaica	1	1	1		1		Unknown	Least Concern	Least Concern	Non Endemic	Mainland	Non-islandic	Palearctic to Afrotropic	Afrotropic	Cosmopolitan	Insectivore	1854	1854	1825	9.8	1		1	1	1						4
1	Nycteridae	Yangochiroptera	Nycteris tragata	1				1		Decreasing	Near Threatened	Near Threatened	Non Endemic	Mainland	Non-islandic	Indomalayan	Indomalayan	Indomalayan	Insectivore	229	229	1825	14.4												1		1			2			1						1
1	Nycteridae	Yangochiroptera	Nycteris woodi		1			1		Decreasing	Least Concern	Least Concern	Non Endemic	Mainland	Non-islandic	Afrotropic	Afrotropic	Afrotropic	Insectivore	90	90	1825	7.6	1		1		1						3	1			1		2
1	Vespertilionidae	Yangochiroptera	Nycticeius humeralis	1						Stable	Least Concern	Least Concern	Non Endemic	Mainland	Non-islandic	Nearctic to Neotropic	Nearctic	Cosmopolitan	Insectivore	379	379	2055.24	9														1
1	Vespertilionidae	Yangochiroptera	Nycticeius humeralis	1						Stable	Least Concern	Least Concern	Non Endemic	Mainland	Non-islandic	Nearctic to Neotropic	Neotropic	Cosmopolitan	Insectivore	379	379	2055.24	9														1
1	Natalidae	Yangochiroptera	Nyctiellus lepidus	1				1		Unknown	Least Concern	Least Concern	Non Endemic	Small-ranging islands	Islandic	Neotropic	Neotropic	Neotropic	Insectivore	38	38	2070.53	2.4	1		1								2
1	Molossidae	Yangochiroptera	Nyctinomops aurispinosus	1				1		Unknown	Least Concern	Least Concern	Non Endemic	Mainland	Non-islandic	Neotropic	Neotropic	Neotropic	Insectivore	432	432	1427.91	18														1
1	Molossidae	Yangochiroptera	Nyctinomops femorosaccus					1		Stable	Least Concern	Least Concern	Non Endemic	Mainland	Non-islandic	Nearctic	Nearctic	Nearctic	Insectivore	432	432	1427.91	18															1		1
1	Molossidae	Yangochiroptera	Nyctinomops laticaudatus	1			1			Unknown	Least Concern	Least Concern	Non Endemic	Mainland	Non-islandic	Neotropic	Neotropic	Neotropic	Insectivore	1636	1636	1427.91	12.2
1	Molossidae	Yangochiroptera	Nyctinomops macrotis	1						Unknown	Least Concern	Least Concern	Non Endemic	Mainland	Non-islandic	Neotropic	Neotropic	Neotropic	Insectivore	1907	1907	1427.91	18.4
1	Vespertilionidae	Yangochiroptera	Nyctophilus bifax	1						Stable	Least Concern	Least Concern	Non Endemic	Mainland	Non-islandic	Oceania	Oceania	Oceania	Insectivore	217	217	2055.24	9.8														1			1
1	Vespertilionidae	Yangochiroptera	Nyctophilus geoffroyi	1	1					Stable	Least Concern	Least Concern	Endemic	Mainland	Non-islandic	Oceania	Oceania	Oceania	Insectivore	892	892	2055.24	7.3
1	Vespertilionidae	Yangochiroptera	Nyctophilus gouldi	1						Decreasing	Least Concern	Least Concern	Non Endemic	Mainland	Non-islandic	Indomalayan to Oceania	Indomalayan	Cosmopolitan	Insectivore	162	162	2051.67	10														1			1
1	Vespertilionidae	Yangochiroptera	Nyctophilus gouldi	1						Decreasing	Least Concern	Least Concern	Non Endemic	Mainland	Non-islandic	Indomalayan to Oceania	Oceania	Cosmopolitan	Insectivore	162	162	2051.67	10														1			1
1	Vespertilionidae	Yangochiroptera	Nyctophilus howensis					1		Unknown	Critically Endangered	Critically Endangered	Endemic	Small-ranging islands	Islandic	Oceania	Oceania	Oceania	Insectivore	0	1	2055.24	20.6																			1							1
1	Vespertilionidae	Yangochiroptera	Nyctophilus microdon	1				1		Unknown	Data Deficient	Data Deficient	Endemic	Land bridges	Islandic	Oceania	Oceania	Oceania	Insectivore	5	6	2055.24	8	1		1								2			1			1
1	Vespertilionidae	Yangochiroptera	Nyctophilus microtis	1				1		Stable	Least Concern	Least Concern	Non Endemic	Land bridges	Islandic	Indomalayan to Oceania	Indomalayan	Cosmopolitan	Insectivore	53	53	2055.24	7.1												1		1
1	Vespertilionidae	Yangochiroptera	Nyctophilus microtis	1				1		Stable	Least Concern	Least Concern	Non Endemic	Land bridges	Islandic	Indomalayan to Oceania	Oceania	Cosmopolitan	Insectivore	53	53	2055.24	7.1												1		1
1	Molossidae	Yangochiroptera	Otomops harrisoni	1	1					Decreasing	Vulnerable	Vulnerable	Non Endemic	Mainland	Non-islandic	Afrotropic	Afrotropic	Afrotropic	Insectivore	890	890	1427.91	34.3	1			1					1		3
1	Molossidae	Yangochiroptera	Otomops madagascariensis	1				1		Unknown	Least Concern	Least Concern	Endemic	Small-ranging islands	Islandic	Afrotropic	Afrotropic	Afrotropic	Insectivore	7	7	1427.91	25.5			1								1
1	Molossidae	Yangochiroptera	Otomops martiensseni	1	1					Decreasing	Near Threatened	Near Threatened	Non Endemic	Mainland	Non-islandic	Afrotropic	Afrotropic	Afrotropic	Insectivore	890	890	1427.91	34.3	1		1	1							3			1	1		2
1	Molossidae	Yangochiroptera	Otomops wroughtoni	1				1		Unknown	Data Deficient	Data Deficient	Non Endemic	Mainland	Non-islandic	Indomalayan	Indomalayan	Indomalayan	Insectivore	12	12	1427.91	34.3	1		1							1	3	1		1			2	1								1
1	Vespertilionidae	Yangochiroptera	Otonycteris hemprichii			1	1			Unknown	Least Concern	Least Concern	Non Endemic	Mainland	Non-islandic	Afrotropic	Afrotropic	Afrotropic	Insectivore	259	259	2051.67	23.8															1
1	Hipposideridae	Yinpterochiroptera	Paratriaenops auritus	1				1		Unknown	Vulnerable	Vulnerable	Endemic	Small-ranging islands	Islandic	Afrotropic	Afrotropic	Afrotropic	Insectivore	2	2	1834.23	5			1		1						2			1			1
1	Hipposideridae	Yinpterochiroptera	Paratriaenops furculus	1				1		Unknown	Least Concern	Least Concern	Endemic	Small-ranging islands	Islandic	Afrotropic	Afrotropic	Afrotropic	Insectivore	24	24	1834.23	5.5			1								1			1			1
1	Emballonuridae	Yangochiroptera	Paremballonura atrata	1				1		Unknown	Least Concern	Least Concern	Endemic	Small-ranging islands	Islandic	Afrotropic	Afrotropic	Afrotropic	Insectivore	31	31	894.25	4.3							1				1	1		1			2
1	Emballonuridae	Yangochiroptera	Paremballonura tiavato	1				1		Unknown	Least Concern	Least Concern	Endemic	Small-ranging islands	Islandic	Afrotropic	Afrotropic	Afrotropic	Insectivore	42	42	894.25	3.3			1		1						2			1			1			1						1
1	Pteropodidae	Yinpterochiroptera	Penthetor lucasi	1				1		Decreasing	Least Concern	Least Concern	Endemic	Mainland	Non-islandic	Indomalayan	Indomalayan	Indomalayan	Frugivore	206	206	1553.79	38.2	1										1	1		1			2			1						1
1	Vespertilionidae	Yangochiroptera	Perimyotis subflavus	1				1		Decreasing	Vulnerable	Vulnerable	Non Endemic	Mainland	Non-islandic	Nearctic to Neotropic	Nearctic	Cosmopolitan	Insectivore	583	583	1809.35	5.8													1	1				1
1	Vespertilionidae	Yangochiroptera	Perimyotis subflavus	1				1		Decreasing	Vulnerable	Vulnerable	Non Endemic	Mainland	Non-islandic	Nearctic to Neotropic	Neotropic	Cosmopolitan	Insectivore	583	583	1809.35	5.8													1	1				1
1	Emballonuridae	Yangochiroptera	Peropteryx kappleri	1				1		Unknown	Least Concern	Least Concern	Non Endemic	Mainland	Non-islandic	Neotropic	Neotropic	Neotropic	Insectivore	1428	1428	894.25	9.4
1	Emballonuridae	Yangochiroptera	Peropteryx leucoptera	1				1		Unknown	Least Concern	Least Concern	Non Endemic	Mainland	Non-islandic	Neotropic	Neotropic	Neotropic	Insectivore	624	624	894.25	6			1		1						2			1			1
1	Emballonuridae	Yangochiroptera	Peropteryx macrotis	1						Stable	Least Concern	Least Concern	Non Endemic	Mainland	Non-islandic	Neotropic	Neotropic	Neotropic	Insectivore	1526	1526	894.25	5.4
1	Emballonuridae	Yangochiroptera	Peropteryx pallidoptera	1						Unknown	Data Deficient	Data Deficient	Non Endemic	Land bridges	Islandic	Neotropic	Neotropic	Neotropic	Insectivore	76	76	894.25	6.3
1	Emballonuridae	Yangochiroptera	Peropteryx trinitatis	1				1		Unknown	Data Deficient	Data Deficient	Non Endemic	Mainland	Non-islandic	Neotropic	Neotropic	Neotropic	Insectivore	9	9	894.25	4.4
1	Vespertilionidae	Yangochiroptera	Phoniscus jagorii	1					1	Unknown	Least Concern	Least Concern	Non Endemic	Mainland	Non-islandic	Indomalayan	Indomalayan	Indomalayan	Insectivore	94	94	2055.24	4.7														1			1
1	Vespertilionidae	Yangochiroptera	Phoniscus papuensis	1				1		Unknown	Least Concern	Least Concern	Non Endemic	Mainland	Non-islandic	Oceania	Oceania	Oceania	Insectivore	129	129	2055.24	6.2												1		1			2		1	1						2
1	Phyllostomidae	Yangochiroptera	Phylloderma stenops	1	1			1	1	Stable	Least Concern	Least Concern	Non Endemic	Mainland	Non-islandic	Neotropic	Neotropic	Neotropic	Insectivore	1326	1326	2064.28	53.7
1	Phyllostomidae	Yangochiroptera	Phyllonycteris aphylla					1		Decreasing	Critically Endangered	Critically Endangered	Endemic	Small-ranging islands	Islandic	Neotropic	Neotropic	Neotropic	Frugivore	2	2	2064.28	24.5			1								1								1							1
1	Phyllostomidae	Yangochiroptera	Phyllonycteris poeyi	1						Unknown	Least Concern	Least Concern	Non Endemic	Small-ranging islands	Islandic	Neotropic	Neotropic	Neotropic	Omnivore	52	52	2064.28	22	1		1								2
1	Phyllostomidae	Yangochiroptera	Phyllostomus discolor	1	1			1	1	Stable	Least Concern	Least Concern	Non Endemic	Mainland	Non-islandic	Neotropic	Neotropic	Neotropic	Insectivore	1497	1497	2064.28	34.1
1	Phyllostomidae	Yangochiroptera	Phyllostomus elongatus	1	1			1		Unknown	Least Concern	Least Concern	Non Endemic	Mainland	Non-islandic	Neotropic	Neotropic	Neotropic	Omnivore	1237	1237	2064.28	40.4														1			1
1	Phyllostomidae	Yangochiroptera	Phyllostomus hastatus	1	1			1	1	Stable	Least Concern	Least Concern	Non Endemic	Mainland	Non-islandic	Neotropic	Neotropic	Neotropic	Insectivore	1493	1493	2064.28	87.2
1	Phyllostomidae	Yangochiroptera	Phyllostomus latifolius	1				1		Unknown	Least Concern	Least Concern	Non Endemic	Mainland	Non-islandic	Neotropic	Neotropic	Neotropic	Omnivore	208	208	2064.28	134	1		1		1						3
1	Vespertilionidae	Yangochiroptera	Pipistrellus aladdin	1		1	1	1		Unknown	Data Deficient	Data Deficient	Non Endemic	Mainland	Non-islandic	Palearctic	Palearctic	Palearctic	Insectivore	583	583	1885.95	5.8
1	Vespertilionidae	Yangochiroptera	Pipistrellus angulatus	1				1		Stable	Least Concern	Least Concern	Non Endemic	Land bridges	Islandic	Indomalayan to Oceania	Indomalayan	Cosmopolitan	Insectivore	107	107	1885.95	3.3
1	Vespertilionidae	Yangochiroptera	Pipistrellus angulatus	1				1		Stable	Least Concern	Least Concern	Non Endemic	Land bridges	Islandic	Indomalayan to Oceania	Oceania	Cosmopolitan	Insectivore	107	107	1885.95	3.3
1	Vespertilionidae	Yangochiroptera	Pipistrellus cadornae	1				1		Unknown	Least Concern	Least Concern	Non Endemic	Mainland	Non-islandic	Indomalayan	Indomalayan	Indomalayan	Insectivore	84	84	1885.95	6.7			1		1						2
1	Vespertilionidae	Yangochiroptera	Pipistrellus ceylonicus	1				1		Stable	Least Concern	Least Concern	Non Endemic	Mainland	Non-islandic	Indomalayan to Paleartic	Indomalayan	Cosmopolitan	Insectivore	353	353	1885.95	8.4							1				1
1	Vespertilionidae	Yangochiroptera	Pipistrellus ceylonicus	1				1		Stable	Least Concern	Least Concern	Non Endemic	Mainland	Non-islandic	Indomalayan to Paleartic	Palearctic	Cosmopolitan	Insectivore	353	353	1885.95	8.4							1				1
1	Vespertilionidae	Yangochiroptera	Pipistrellus coromandra	1				1		Unknown	Least Concern	Least Concern	Non Endemic	Mainland	Non-islandic	Indomalayan to Paleartic	Indomalayan	Cosmopolitan	Insectivore	538	538	1885.95	4.6
1	Vespertilionidae	Yangochiroptera	Pipistrellus coromandra	1				1		Unknown	Least Concern	Least Concern	Non Endemic	Mainland	Non-islandic	Indomalayan to Paleartic	Palearctic	Cosmopolitan	Insectivore	538	538	1885.95	4.6
1	Vespertilionidae	Yangochiroptera	Pipistrellus hesperus	1		1		1		Stable	Least Concern	Least Concern	Non Endemic	Mainland	Non-islandic	Nearctic to Neotropic	Nearctic	Cosmopolitan	Insectivore	399	399	1885.95	3.7	1		1								2			1		1	2
1	Vespertilionidae	Yangochiroptera	Pipistrellus hesperus	1		1		1		Stable	Least Concern	Least Concern	Non Endemic	Mainland	Non-islandic	Nearctic to Neotropic	Neotropic	Cosmopolitan	Insectivore	399	399	1885.95	3.7	1		1								2			1		1	2
1	Vespertilionidae	Yangochiroptera	Pipistrellus javanicus	1				1		Stable	Least Concern	Least Concern	Non Endemic	Mainland	Non-islandic	Indomalayan	Indomalayan	Indomalayan	Insectivore	643	643	1885.95	4.8			1		1						2	1	1	1			3
1	Vespertilionidae	Yangochiroptera	Pipistrellus kuhlii	1						Unknown	Least Concern	Least Concern	Non Endemic	Mainland	Non-islandic	Palearctic	Palearctic	Palearctic	Insectivore	1562	1562	1885.95	5.9															1		1
1	Vespertilionidae	Yangochiroptera	Pipistrellus nathusii	1					1	Unknown	Least Concern	Least Concern	Non Endemic	Mainland	Non-islandic	Palearctic	Palearctic	Palearctic	Insectivore	868	868	1885.95	7.3														1	1		2
1	Vespertilionidae	Yangochiroptera	Pipistrellus paterculus	1						Unknown	Least Concern	Least Concern	Non Endemic	Mainland	Non-islandic	Indomalayan to Paleartic	Indomalayan	Cosmopolitan	Insectivore	139	139	1885.95	5.3												1		1			2
1	Vespertilionidae	Yangochiroptera	Pipistrellus paterculus	1						Unknown	Least Concern	Least Concern	Non Endemic	Mainland	Non-islandic	Indomalayan to Paleartic	Palearctic	Cosmopolitan	Insectivore	139	139	1885.95	5.3												1		1			2
1	Vespertilionidae	Yangochiroptera	Pipistrellus pipistrellus	1						Stable	Least Concern	Least Concern	Non Endemic	Mainland	Non-islandic	Palearctic	Palearctic	Palearctic	Insectivore	1658	1658	1962.54	5.7															1	1	2
1	Vespertilionidae	Yangochiroptera	Pipistrellus pygmaeus	1					1	Unknown	Least Concern	Least Concern	Non Endemic	Mainland	Non-islandic	Nearctic	Nearctic	Nearctic	Insectivore	418	418	1885.95	5.7													1	1			2
1	Vespertilionidae	Yangochiroptera	Pipistrellus tenuis	1						Stable	Least Concern	Least Concern	Non Endemic	Mainland	Non-islandic	Indomalayan	Indomalayan	Indomalayan	Insectivore	1160	1160	1885.95	4.7
1	Phyllostomidae	Yangochiroptera	Platalina genovensium		1			1		Unknown	Near Threatened	Near Threatened	Non Endemic	Mainland	Non-islandic	Neotropic	Neotropic	Neotropic	Omnivore	66	66	2064.28	47	1		1				1				3		1				1				1					1
1	Phyllostomidae	Yangochiroptera	Platyrrhinus angustirostris	1						Unknown	Least Concern	Least Concern	Non Endemic	Mainland	Non-islandic	Neotropic	Neotropic	Neotropic	Omnivore	1	1	2064.28	15
1	Phyllostomidae	Yangochiroptera	Platyrrhinus brachycephalus	1				1		Stable	Least Concern	Least Concern	Non Endemic	Mainland	Non-islandic	Neotropic	Neotropic	Neotropic	Omnivore	732	732	2064.28	14.1														1			1
1	Phyllostomidae	Yangochiroptera	Platyrrhinus dorsalis	1						Unknown	Least Concern	Least Concern	Non Endemic	Mainland	Non-islandic	Neotropic	Neotropic	Neotropic	Omnivore	124	124	2064.28	26												1		1			2
1	Phyllostomidae	Yangochiroptera	Platyrrhinus fusciventris	1						Stable	Least Concern	Least Concern	Non Endemic	Mainland	Non-islandic	Neotropic	Neotropic	Neotropic	Omnivore	1223	1223	2064.28	13.5
1	Phyllostomidae	Yangochiroptera	Platyrrhinus helleri	1	1			1		Stable	Least Concern	Least Concern	Non Endemic	Mainland	Non-islandic	Neotropic	Neotropic	Neotropic	Insectivore	1223	1223	2064.28	13.5
1	Phyllostomidae	Yangochiroptera	Platyrrhinus incarum	1	1				1	Stable	Least Concern	Least Concern	Non Endemic	Mainland	Non-islandic	Neotropic	Neotropic	Neotropic	Omnivore	1223	1223	2064.28	13.5
1	Phyllostomidae	Yangochiroptera	Platyrrhinus infuscus	1				1		Unknown	Least Concern	Least Concern	Non Endemic	Mainland	Non-islandic	Neotropic	Neotropic	Neotropic	Omnivore	209	209	2064.28	50.2
1	Phyllostomidae	Yangochiroptera	Platyrrhinus ismaeli	1				1		Decreasing	Data Deficient	Data Deficient	Non Endemic	Mainland	Non-islandic	Neotropic	Neotropic	Neotropic	Omnivore	29	29	2064.28	37.1			1								1	1		1			2
1	Phyllostomidae	Yangochiroptera	Platyrrhinus lineatus	1	1			1	1	Stable	Least Concern	Least Concern	Non Endemic	Mainland	Non-islandic	Neotropic	Neotropic	Neotropic	Omnivore	769	769	2064.28	24.4
1	Phyllostomidae	Yangochiroptera	Platyrrhinus recifinus	1	1			1		Unknown	Least Concern	Least Concern	Endemic	Mainland	Non-islandic	Neotropic	Neotropic	Neotropic	Omnivore	164	164	2064.28	11												1		1			2
1	Vespertilionidae	Yangochiroptera	Plecotus auritus	1				1		Stable	Least Concern	Least Concern	Non Endemic	Mainland	Non-islandic	Palearctic	Palearctic	Palearctic	Insectivore	925	925	3693.8	7.8			1								1			1	1		2
1	Vespertilionidae	Yangochiroptera	Plecotus austriacus	1		1		1	1	Unknown	Least Concern	Least Concern	Non Endemic	Mainland	Non-islandic	Palearctic	Palearctic	Palearctic	Insectivore	438	438	2759.4	7.3												1			1		2
1	Vespertilionidae	Yangochiroptera	Plecotus christii			1				Unknown	Data Deficient	Data Deficient	Non Endemic	Mainland	Non-islandic	Palearctic	Palearctic	Palearctic	Insectivore	29	30	2759.4	7	1		1		1						3
1	Vespertilionidae	Yangochiroptera	Plecotus gaisleri	1				1		Unknown	Data Deficient	Data Deficient	Non Endemic	Mainland	Non-islandic	Palearctic	Palearctic	Palearctic	Insectivore	1	1	2759.4	8
1	Vespertilionidae	Yangochiroptera	Plecotus kolombatovici					1		Decreasing	Least Concern	Least Concern	Non Endemic	Mainland	Non-islandic	Palearctic	Palearctic	Palearctic	Insectivore	205	205	1825	7			1								1				1		1
1	Vespertilionidae	Yangochiroptera	Plecotus macrobullaris	1				1		Decreasing	Least Concern	Least Concern	Non Endemic	Mainland	Non-islandic	Palearctic	Palearctic	Palearctic	Insectivore	199	199	2759.4	8.5			1								1		1				1
1	Vespertilionidae	Yangochiroptera	Plecotus ognevi	1						Unknown	Least Concern	Least Concern	Non Endemic	Mainland	Non-islandic	Palearctic	Palearctic	Palearctic	Insectivore	775	775	2759.4	8.4
1	Vespertilionidae	Yangochiroptera	Plecotus sacrimontis	1				1		Stable	Least Concern	Least Concern	Non Endemic	Land bridges	Islandic	Palearctic	Palearctic	Palearctic	Insectivore	61	61	2759.4	9.3
1	Vespertilionidae	Yangochiroptera	Plecotus sardus	1				1		Decreasing	Vulnerable	Vulnerable	Endemic	Small-ranging islands	Islandic	Palearctic	Palearctic	Palearctic	Insectivore	6	6	2759.4	9.8			1								1			1			1
1	Vespertilionidae	Yangochiroptera	Plecotus taivanus	1				1		Decreasing	Near Threatened	Near Threatened	Endemic	Land bridges	Islandic	Palearctic	Palearctic	Palearctic	Insectivore	10	10	2759.4	6.5														1			1
1	Vespertilionidae	Yangochiroptera	Plecotus teneriffae	1				1		Decreasing	Vulnerable	Vulnerable	Endemic	Small-ranging islands	Islandic	Palearctic	Palearctic	Palearctic	Insectivore	6	6	2759.4	8							1	1			2	1	1		1		3
1	Vespertilionidae	Yangochiroptera	Plecotus turkmenicus			1		1		Unknown	Least Concern	Least Concern	Non Endemic	Mainland	Non-islandic	Palearctic	Palearctic	Palearctic	Insectivore	438	438	2759.4	7.3
1	Molossidae	Yangochiroptera	Promops nasutus							Unknown	Least Concern	Least Concern	Non Endemic	Mainland	Non-islandic	Neotropic	Neotropic	Neotropic	Insectivore	993	993	1427.91	15.2
1	Pteropodidae	Yinpterochiroptera	Ptenochirus jagori	1				1		Stable	Least Concern	Least Concern	Endemic	Small-ranging islands	Islandic	Indomalayan	Indomalayan	Indomalayan	Frugivore	80	80	1019.56	77.3
1	Pteropodidae	Yinpterochiroptera	Ptenochirus minor	1						Stable	Least Concern	Least Concern	Endemic	Small-ranging islands	Islandic	Indomalayan	Indomalayan	Indomalayan	Frugivore	34	34	1019.56	36.3												1		1			2
1	Mormoopidae	Yangochiroptera	Pteronotus davyi	1				1		Stable	Least Concern	Least Concern	Non Endemic	Mainland	Non-islandic	Neotropic	Neotropic	Neotropic	Insectivore	559	559	2070.53	9.2	1										1
1	Mormoopidae	Yangochiroptera	Pteronotus gymnonotus	1	1			1		Stable	Least Concern	Least Concern	Non Endemic	Mainland	Non-islandic	Neotropic	Neotropic	Neotropic	Insectivore	479	479	1888.07	14.4	1		1								2
1	Mormoopidae	Yangochiroptera	Pteronotus macleayii					1		Stable	Least Concern	Least Concern	Non Endemic	Small-ranging islands	Islandic	Neotropic	Neotropic	Neotropic	Insectivore	36	36	1888.07	5.4			1	1	1						3			1			1
1	Mormoopidae	Yangochiroptera	Pteronotus mesoamericanus	1				1		Unknown	Least Concern	Least Concern	Non Endemic	Mainland	Non-islandic	Neotropic	Neotropic	Neotropic	Insectivore	90	90	1888.07	15.1
1	Mormoopidae	Yangochiroptera	Pteronotus paraguanensis	1				1		Decreasing	Endangered	Endangered	Non Endemic	Mainland	Non-islandic	Neotropic	Neotropic	Neotropic	Insectivore	2	2	1888.07	13.9	1			1	1			1			4
1	Mormoopidae	Yangochiroptera	Pteronotus parnellii	1				1		Stable	Least Concern	Least Concern	Non Endemic	Mainland	Non-islandic	Neotropic	Neotropic	Neotropic	Insectivore	57	57	1888.07	19.7
1	Mormoopidae	Yangochiroptera	Pteronotus personatus	1	1			1		Stable	Least Concern	Least Concern	Non Endemic	Mainland	Non-islandic	Neotropic	Neotropic	Neotropic	Insectivore	712	712	2070.53	8.7
1	Mormoopidae	Yangochiroptera	Pteronotus quadridens					1		Stable	Least Concern	Least Concern	Non Endemic	Small-ranging islands	Islandic	Neotropic	Neotropic	Neotropic	Insectivore	57	57	2070.53	5.2
1	Mormoopidae	Yangochiroptera	Pteronotus rubiginosus	1						Unknown	Least Concern	Least Concern	Non Endemic	Mainland	Non-islandic	Neotropic	Neotropic	Neotropic	Insectivore	572	572	1888.07	16.4
1	Pteropodidae	Yinpterochiroptera	Pteropus admiralitatum	1				1		Stable	Least Concern	Least Concern	Endemic	Small-ranging islands	Islandic	Oceania	Oceania	Oceania	Frugivore	56	56	2945.92	299							1	1				1		1
1	Pteropodidae	Yinpterochiroptera	Pteropus rayneri	1				1		Decreasing	Near Threatened	Near Threatened	Endemic	Small-ranging islands	Islandic	Oceania	Oceania	Oceania	Frugivore	24	24	2945.92	724							1	1				1	1	1										1	1
1	Pteropodidae	Yinpterochiroptera	Pteropus vetulus	1				1		Decreasing	Near Threatened	Near Threatened	Endemic	Small-ranging islands	Islandic	Oceania	Oceania	Oceania	Frugivore	11	11	2945.92	148							1	1						1					1
1	Phyllostomidae	Yangochiroptera	Pygoderma bilabiatum	1	1			1	1	Unknown	Least Concern	Least Concern	Non Endemic	Mainland	Non-islandic	Neotropic	Neotropic	Neotropic	Insectivore	389	389	2064.28	18.5
1	Rhinolophidae	Yinpterochiroptera	Rhinolophus acuminatus	1				1		Unknown	Least Concern	Least Concern	Non Endemic	Mainland	Non-islandic	Indomalayan	Indomalayan	Indomalayan	Insectivore	220	220	2726.54	12.1			1		1						2
1	Rhinolophidae	Yinpterochiroptera	Rhinolophus adami	1				1		Unknown	Data Deficient	Data Deficient	Endemic	Mainland	Non-islandic	Afrotropic	Afrotropic	Afrotropic	Insectivore	1	1	2726.54	5.8			1		1						2
1	Rhinolophidae	Yinpterochiroptera	Rhinolophus affinis	1				1		Stable	Least Concern	Least Concern	Non Endemic	Mainland	Non-islandic	Indomalayan	Indomalayan	Indomalayan	Insectivore	805	805	2726.54	13.6	1										1
1	Rhinolophidae	Yinpterochiroptera	Rhinolophus alcyone	1	1			1		Unknown	Least Concern	Least Concern	Non Endemic	Mainland	Non-islandic	Afrotropic	Afrotropic	Afrotropic	Insectivore	391	391	2726.54	18.8							1				1	1		1			2
1	Rhinolophidae	Yinpterochiroptera	Rhinolophus arcuatus	1				1		Stable	Least Concern	Least Concern	Non Endemic	Land bridges	Islandic	Indomalayan	Indomalayan	Indomalayan	Insectivore	118	118	2937.38	8.8				1			1				2			1			1
1	Rhinolophidae	Yinpterochiroptera	Rhinolophus beddomei	1				1		Stable	Least Concern	Least Concern	Endemic	Mainland	Non-islandic	Indomalayan	Indomalayan	Indomalayan	Insectivore	51	51	2726.54	14.5												1		1			2
1	Rhinolophidae	Yinpterochiroptera	Rhinolophus blasii	1	1	1		1		Decreasing	Least Concern	Least Concern	Non Endemic	Mainland	Non-islandic	Palearctic	Palearctic	Palearctic	Insectivore	599	599	3285	9.7			1								1	1		1			2
1	Rhinolophidae	Yinpterochiroptera	Rhinolophus bocharicus			1		1		Stable	Least Concern	Least Concern	Non Endemic	Mainland	Non-islandic	Palearctic	Palearctic	Palearctic	Insectivore	126	126	2726.54	15.2	1				1						2
1	Rhinolophidae	Yinpterochiroptera	Rhinolophus borneensis	1				1		Unknown	Least Concern	Least Concern	Non Endemic	Mainland	Non-islandic	Indomalayan	Indomalayan	Indomalayan	Insectivore	127	127	2726.54	7.9
1	Rhinolophidae	Yinpterochiroptera	Rhinolophus canuti	1				1		Decreasing	Vulnerable	Vulnerable	Endemic	Land bridges	Islandic	Indomalayan	Indomalayan	Indomalayan	Insectivore	5	8	2726.54	12.7			1		1						2	1		1			2
1	Rhinolophidae	Yinpterochiroptera	Rhinolophus capensis					1		Stable	Least Concern	Least Concern	Non Endemic	Mainland	Non-islandic	Afrotropic	Afrotropic	Afrotropic	Insectivore	46	46	2726.54	12.8			1		1						2	1					1
1	Rhinolophidae	Yinpterochiroptera	Rhinolophus celebensis	1				1		Unknown	Least Concern	Least Concern	Endemic	Land bridges	Islandic	Indomalayan	Indomalayan	Indomalayan	Insectivore	87	87	2726.54	6.7	1		1								2	1		1			2
1	Rhinolophidae	Yinpterochiroptera	Rhinolophus clivosus	1	1	1		1		Unknown	Least Concern	Least Concern	Non Endemic	Mainland	Non-islandic	Afrotropic	Afrotropic	Afrotropic	Insectivore	691	691	2726.54	15.7			1		1						2				1		1
1	Rhinolophidae	Yinpterochiroptera	Rhinolophus coelophyllus	1						Unknown	Least Concern	Least Concern	Non Endemic	Mainland	Non-islandic	Indomalayan	Indomalayan	Indomalayan	Insectivore	77	77	2937.38	7.1
1	Rhinolophidae	Yinpterochiroptera	Rhinolophus cognatus	1				1		Decreasing	Endangered	Endangered	Endemic	Small-ranging islands	Islandic	Indomalayan	Indomalayan	Indomalayan	Insectivore	8	8	2726.54	5.4						1					1
1	Rhinolophidae	Yinpterochiroptera	Rhinolophus cohenae		1			1		Decreasing	Vulnerable	Vulnerable	Endemic	Mainland	Non-islandic	Afrotropic	Afrotropic	Afrotropic	Insectivore	1	1	2726.54	26	1		1								2	1		1	1		3		1			1				2
1	Rhinolophidae	Yinpterochiroptera	Rhinolophus convexus	1				1		Unknown	Data Deficient	Data Deficient	Endemic	Mainland	Non-islandic	Indomalayan	Indomalayan	Indomalayan	Insectivore	4	4	2726.54	7.7
1	Rhinolophidae	Yinpterochiroptera	Rhinolophus creaghi	1				1		Decreasing	Least Concern	Least Concern	Non Endemic	Land bridges	Islandic	Indomalayan	Indomalayan	Indomalayan	Insectivore	59	59	2726.54	12	1			1			1				3	1		1			2
1	Rhinolophidae	Yinpterochiroptera	Rhinolophus damarensis		1	1				Unknown	Least Concern	Least Concern	Non Endemic	Mainland	Non-islandic	Afrotropic	Afrotropic	Afrotropic	Insectivore	198	198	2937.38	8.9	1										1
1	Rhinolophidae	Yinpterochiroptera	Rhinolophus darlingi		1			1		Unknown	Least Concern	Least Concern	Non Endemic	Mainland	Non-islandic	Afrotropic	Afrotropic	Afrotropic	Insectivore	36	36	2937.38	9.5
1	Rhinolophidae	Yinpterochiroptera	Rhinolophus deckenii	1				1		Decreasing	Near Threatened	Near Threatened	Non Endemic	Mainland	Non-islandic	Afrotropic	Afrotropic	Afrotropic	Insectivore	36	36	2726.54	16.8	1		1									1		1
1	Rhinolophidae	Yinpterochiroptera	Rhinolophus denti		1			1		Unknown	Least Concern	Least Concern	Non Endemic	Mainland	Non-islandic	Afrotropic	Afrotropic	Afrotropic	Insectivore	234	234	2937.38	6.2			1	1							2
1	Rhinolophidae	Yinpterochiroptera	Rhinolophus eloquens	1	1			1		Unknown	Least Concern	Least Concern	Non Endemic	Mainland	Non-islandic	Afrotropic	Afrotropic	Afrotropic	Insectivore	120	120	2726.54	19.1												1					1
1	Rhinolophidae	Yinpterochiroptera	Rhinolophus euryale	1				1		Decreasing	Near Threatened	Near Threatened	Non Endemic	Mainland	Non-islandic	Palearctic	Palearctic	Palearctic	Insectivore	549	549	3285	8.2			1								1	1	1	1	1		4
1	Rhinolophidae	Yinpterochiroptera	Rhinolophus euryotis	1				1		Unknown	Least Concern	Least Concern	Non Endemic	Land bridges	Islandic	Indomalayan to Oceania	Indomalayan	Cosmopolitan	Insectivore	219	219	2726.54	14.3			1	1	1						3			1			1
1	Rhinolophidae	Yinpterochiroptera	Rhinolophus euryotis	1				1		Unknown	Least Concern	Least Concern	Non Endemic	Land bridges	Islandic	Indomalayan to Oceania	Oceania	Cosmopolitan	Insectivore	219	219	2726.54	14.3			1	1	1						3			1			1
1	Rhinolophidae	Yinpterochiroptera	Rhinolophus ferrumequinum	1				1		Decreasing	Least Concern	Least Concern	Non Endemic	Mainland	Non-islandic	Palearctic	Palearctic	Palearctic	Insectivore	1477	1477	3285	21.1			1								1	1	1	1	1		4
1	Rhinolophidae	Yinpterochiroptera	Rhinolophus formosae	1				1		Decreasing	Near Threatened	Near Threatened	Endemic	Land bridges	Islandic	Palearctic	Palearctic	Palearctic	Insectivore	10	10	2726.54	20												1	1	1			3
1	Rhinolophidae	Yinpterochiroptera	Rhinolophus fumigatus	1	1			1		Unknown	Least Concern	Least Concern	Non Endemic	Mainland	Non-islandic	Afrotropic	Afrotropic	Afrotropic	Insectivore	1055	1055	2726.54	12.9
1	Rhinolophidae	Yinpterochiroptera	Rhinolophus guineensis	1	1			1	1	Decreasing	Vulnerable	Vulnerable	Non Endemic	Mainland	Non-islandic	Afrotropic	Afrotropic	Afrotropic	Insectivore	34	34	2726.54	10.4	1						1				2	1		1			2
1	Rhinolophidae	Yinpterochiroptera	Rhinolophus hildebrandtii	1	1			1		Unknown	Least Concern	Least Concern	Non Endemic	Mainland	Non-islandic	Afrotropic	Afrotropic	Afrotropic	Insectivore	406	406	2726.54	25.8
1	Rhinolophidae	Yinpterochiroptera	Rhinolophus hilli	1				1		Decreasing	Critically Endangered	Critically Endangered	Endemic	Mainland	Non-islandic	Afrotropic	Afrotropic	Afrotropic	Insectivore	1	1	2726.54	16.5							1				1	1		1			2
1	Rhinolophidae	Yinpterochiroptera	Rhinolophus hillorum	1				1		Decreasing	Near Threatened	Near Threatened	Non Endemic	Mainland	Non-islandic	Afrotropic	Afrotropic	Afrotropic	Insectivore	15	15	2726.54	14.8	1						1				2	1					1
1	Rhinolophidae	Yinpterochiroptera	Rhinolophus hipposideros	1				1		Decreasing	Least Concern	Least Concern	Non Endemic	Mainland	Non-islandic	Palearctic	Palearctic	Palearctic	Insectivore	1014	1014	2589.76	4.7			1	1							2		1	1	1		3
1	Rhinolophidae	Yinpterochiroptera	Rhinolophus huananus	1				1		Unknown	Least Concern	Least Concern	Endemic	Mainland	Non-islandic	Palearctic	Palearctic	Palearctic	Insectivore	49	49	2589.76	5.1	1		1										1	1
1	Rhinolophidae	Yinpterochiroptera	Rhinolophus indorouxii	1				1		Unknown	Data Deficient	Data Deficient	Endemic	Mainland	Non-islandic	Indomalayan	Indomalayan	Indomalayan	Insectivore	1	1	2589.76	16.5			1				1				2	1		1			2
1	Rhinolophidae	Yinpterochiroptera	Rhinolophus kahuzi	1				1		Decreasing	Endangered	Endangered	Endemic	Mainland	Non-islandic	Afrotropic	Afrotropic	Afrotropic	Insectivore	4	5	2589.76	13.1		1					1							1
1	Rhinolophidae	Yinpterochiroptera	Rhinolophus keyensis							Unknown	Data Deficient	Data Deficient	Endemic	Small-ranging islands	Islandic	Indomalayan	Indomalayan	Indomalayan	Insectivore	30	38	2937.38	7.4														1			1
1	Rhinolophidae	Yinpterochiroptera	Rhinolophus landeri	1	1			1		Unknown	Least Concern	Least Concern	Non Endemic	Mainland	Non-islandic	Afrotropic	Afrotropic	Afrotropic	Insectivore	1456	1456	2937.38	8.9
1	Rhinolophidae	Yinpterochiroptera	Rhinolophus lepidus	1				1		Unknown	Least Concern	Least Concern	Non Endemic	Mainland	Non-islandic	Indomalayan to Paleartic	Indomalayan	Cosmopolitan	Insectivore	510	510	2937.38	5.7			1								1		1				1
1	Rhinolophidae	Yinpterochiroptera	Rhinolophus lepidus	1				1		Unknown	Least Concern	Least Concern	Non Endemic	Mainland	Non-islandic	Indomalayan to Paleartic	Palearctic	Cosmopolitan	Insectivore	510	510	2937.38	5.7			1								1		1				1
1	Rhinolophidae	Yinpterochiroptera	Rhinolophus luctus	1				1		Unknown	Least Concern	Least Concern	Non Endemic	Mainland	Non-islandic	Indomalayan	Indomalayan	Indomalayan	Insectivore	1071	1071	2726.54	33.5							1				1	1		1			2
1	Rhinolophidae	Yinpterochiroptera	Rhinolophus maclaudi		1			1		Decreasing	Endangered	Endangered	Endemic	Mainland	Non-islandic	Afrotropic	Afrotropic	Afrotropic	Insectivore	4	5	2726.54	13.1							1				1			1			1
1	Rhinolophidae	Yinpterochiroptera	Rhinolophus macrotis	1				1		Stable	Least Concern	Least Concern	Non Endemic	Mainland	Non-islandic	Indomalayan	Indomalayan	Indomalayan	Insectivore	397	397	2937.38	6.2			1				1	1			3	1		1	1		3
1	Rhinolophidae	Yinpterochiroptera	Rhinolophus madurensis	1				1		Decreasing	Vulnerable	Vulnerable	Endemic	Land bridges	Islandic	Indomalayan	Indomalayan	Indomalayan	Insectivore	4	4	2726.54	6.7	1										1	1		1			2
1	Rhinolophidae	Yinpterochiroptera	Rhinolophus maendeleo	1				1		Unknown	Data Deficient	Data Deficient	Endemic	Mainland	Non-islandic	Afrotropic	Afrotropic	Afrotropic	Insectivore	3	9	2726.54	6
1	Rhinolophidae	Yinpterochiroptera	Rhinolophus malayanus	1				1		Stable	Least Concern	Least Concern	Non Endemic	Mainland	Non-islandic	Indomalayan	Indomalayan	Indomalayan	Insectivore	224	224	2937.38	6.7
1	Rhinolophidae	Yinpterochiroptera	Rhinolophus marshalli	1				1		Stable	Least Concern	Least Concern	Non Endemic	Mainland	Non-islandic	Indomalayan	Indomalayan	Indomalayan	Insectivore	102	102	2937.38	5
1	Rhinolophidae	Yinpterochiroptera	Rhinolophus mcintyrei	1						Unknown	Data Deficient	Data Deficient	Endemic	Small-ranging islands	Islandic	Oceania	Oceania	Oceania	Insectivore	1	1	2937.38	13.5			1	1	1						3	1		1			2
1	Rhinolophidae	Yinpterochiroptera	Rhinolophus megaphyllus	1				1		Unknown	Least Concern	Least Concern	Non Endemic	Mainland	Non-islandic	Indomalayan to Oceania	Indomalayan	Cosmopolitan	Insectivore	195	195	2726.54	10.1			1		1						2	1		1			2
1	Rhinolophidae	Yinpterochiroptera	Rhinolophus megaphyllus	1				1		Unknown	Least Concern	Least Concern	Non Endemic	Mainland	Non-islandic	Indomalayan to Oceania	Oceania	Cosmopolitan	Insectivore	195	195	2726.54	10.1			1		1						2	1		1			2
1	Rhinolophidae	Yinpterochiroptera	Rhinolophus mehelyi					1		Decreasing	Vulnerable	Vulnerable	Non Endemic	Mainland	Non-islandic	Palearctic	Palearctic	Palearctic	Insectivore	385	498	3285	12.3			1								1	1	1			1	3
1	Rhinolophidae	Yinpterochiroptera	Rhinolophus microglobosus	1				1		Stable	Least Concern	Least Concern	Non Endemic	Mainland	Non-islandic	Indomalayan	Indomalayan	Indomalayan	Insectivore	1	1	3285	9.5	1										1	1		1			2
1	Rhinolophidae	Yinpterochiroptera	Rhinolophus mitratus							Unknown	Data Deficient	Data Deficient	Endemic	Mainland	Non-islandic	Indomalayan	Indomalayan	Indomalayan	Insectivore	1	1	2726.54	19
1	Rhinolophidae	Yinpterochiroptera	Rhinolophus monocerus					1		Unknown	Data Deficient	Data Deficient	Endemic	Mainland	Non-islandic	Indomalayan	Indomalayan	Indomalayan	Insectivore	1	1	2726.54	7
1	Rhinolophidae	Yinpterochiroptera	Rhinolophus montanus					1		Decreasing	Endangered	Endangered	Endemic	Small-ranging islands	Islandic	Indomalayan	Indomalayan	Indomalayan	Insectivore	4	10	2726.54	6.7			1	1	1					1	4	1		1			2
1	Rhinolophidae	Yinpterochiroptera	Rhinolophus mossambicus	1	1			1		Decreasing	Least Concern	Least Concern	Non Endemic	Mainland	Non-islandic	Afrotropic	Afrotropic	Afrotropic	Insectivore	1	1	2726.54	26				1			1				2
1	Rhinolophidae	Yinpterochiroptera	Rhinolophus osgoodi					1		Unknown	Data Deficient	Data Deficient	Endemic	Mainland	Non-islandic	Palearctic	Palearctic	Palearctic	Insectivore	4	4	2726.54	7.3
1	Rhinolophidae	Yinpterochiroptera	Rhinolophus paradoxolophus	1				1		Unknown	Least Concern	Least Concern	Non Endemic	Mainland	Non-islandic	Indomalayan	Indomalayan	Indomalayan	Insectivore	71	71	2937.38	8.2												1		1			2
1	Rhinolophidae	Yinpterochiroptera	Rhinolophus pearsonii	1				1		Unknown	Least Concern	Least Concern	Non Endemic	Mainland	Non-islandic	Indomalayan	Indomalayan	Indomalayan	Insectivore	436	436	2726.54	11.8												1		1			2
1	Rhinolophidae	Yinpterochiroptera	Rhinolophus perditus	1				1	1	Decreasing	Endangered	Endangered	Endemic	Small-ranging islands	Islandic	Palearctic	Palearctic	Palearctic	Insectivore	2	2	2726.54	12			1									1	1	1
1	Rhinolophidae	Yinpterochiroptera	Rhinolophus philippinensis	1				1		Unknown	Least Concern	Least Concern	Non Endemic	Mainland	Non-islandic	Indomalayan to Oceania	Indomalayan	Cosmopolitan	Insectivore	98	98	2726.54	10.3	1		1							1	3			1			1
1	Rhinolophidae	Yinpterochiroptera	Rhinolophus philippinensis	1				1		Unknown	Least Concern	Least Concern	Non Endemic	Mainland	Non-islandic	Indomalayan to Oceania	Oceania	Cosmopolitan	Insectivore	98	98	2726.54	10.3	1		1							1	3			1			1
1	Rhinolophidae	Yinpterochiroptera	Rhinolophus proconsulis	1						Unknown	Endangered	Endangered	Non Endemic	Land bridges	Islandic	Indomalayan	Indomalayan	Indomalayan	Insectivore	1	1	2726.54	10			1		1						2	1		1			2
1	Rhinolophidae	Yinpterochiroptera	Rhinolophus pusillus	1				1		Unknown	Least Concern	Least Concern	Non Endemic	Mainland	Non-islandic	Indomalayan	Indomalayan	Indomalayan	Insectivore	652	653	2937.38	7.2
1	Rhinolophidae	Yinpterochiroptera	Rhinolophus rex	1				1		Decreasing	Least Concern	Least Concern	Endemic	Mainland	Non-islandic	Indomalayan to Paleartic	Indomalayan	Cosmopolitan	Insectivore	19	19	2726.54	11.3												1	1	1			3			1						1
1	Rhinolophidae	Yinpterochiroptera	Rhinolophus rex	1				1		Decreasing	Least Concern	Least Concern	Endemic	Mainland	Non-islandic	Indomalayan to Paleartic	Palearctic	Cosmopolitan	Insectivore	19	19	2726.54	11.3												1	1	1			3			1						1
1	Rhinolophidae	Yinpterochiroptera	Rhinolophus robinsoni	1						Decreasing	Near Threatened	Near Threatened	Non Endemic	Mainland	Non-islandic	Indomalayan	Indomalayan	Indomalayan	Insectivore	18	18	2937.38	8.5			1		1						2	1		1			2			1						1
1	Rhinolophidae	Yinpterochiroptera	Rhinolophus rouxii	1				1		Unknown	Least Concern	Least Concern	Non Endemic	Mainland	Non-islandic	Indomalayan	Indomalayan	Indomalayan	Insectivore	183	183	1051.14	11.8			1		1						2	1		1			2
1	Rhinolophidae	Yinpterochiroptera	Rhinolophus rufus	1				1		Decreasing	Near Threatened	Near Threatened	Endemic	Small-ranging islands	Islandic	Indomalayan	Indomalayan	Indomalayan	Insectivore	26	26	2726.54	30				1	1		1	1			4		1				1
1	Rhinolophidae	Yinpterochiroptera	Rhinolophus ruwenzorii	1				1		Decreasing	Vulnerable	Vulnerable	Non Endemic	Mainland	Non-islandic	Afrotropic	Afrotropic	Afrotropic	Insectivore	9	9	2726.54	17.6	1				1		1	1			4	1		1			2
1	Rhinolophidae	Yinpterochiroptera	Rhinolophus schnitzleri							Unknown	Data Deficient	Data Deficient	Endemic	Mainland	Non-islandic	Indomalayan	Indomalayan	Indomalayan	Insectivore	20	20	2726.54	9
1	Rhinolophidae	Yinpterochiroptera	Rhinolophus sedulus	1				1		Decreasing	Near Threatened	Near Threatened	Non Endemic	Mainland	Non-islandic	Indomalayan	Indomalayan	Indomalayan	Insectivore	125	125	2937.38	8.8												1		1			2
1	Rhinolophidae	Yinpterochiroptera	Rhinolophus shameli	1				1		Unknown	Least Concern	Least Concern	Non Endemic	Mainland	Non-islandic	Indomalayan	Indomalayan	Indomalayan	Insectivore	112	112	2937.38	9.6
1	Rhinolophidae	Yinpterochiroptera	Rhinolophus shortridgei	1						Unknown	Least Concern	Least Concern	Non Endemic	Mainland	Non-islandic	Indomalayan	Indomalayan	Indomalayan	Insectivore	230	230	2726.54	6.4
1	Rhinolophidae	Yinpterochiroptera	Rhinolophus siamensis	1				1		Unknown	Least Concern	Least Concern	Non Endemic	Mainland	Non-islandic	Indomalayan	Indomalayan	Indomalayan	Insectivore	49	49	2726.54	5.1
1	Rhinolophidae	Yinpterochiroptera	Rhinolophus silvestris	1				1		Decreasing	Data Deficient	Data Deficient	Non Endemic	Mainland	Non-islandic	Afrotropic	Afrotropic	Afrotropic	Insectivore	25	25	2726.54	16.8	1		1	1	1		1				5	1		1			2
1	Rhinolophidae	Yinpterochiroptera	Rhinolophus simulator		1			1		Decreasing	Least Concern	Least Concern	Non Endemic	Mainland	Non-islandic	Afrotropic	Afrotropic	Afrotropic	Insectivore	313	313	2937.38	8.1	1		1		1						3	1		1			2
1	Rhinolophidae	Yinpterochiroptera	Rhinolophus sinicus	1				1		Unknown	Least Concern	Least Concern	Non Endemic	Mainland	Non-islandic	Indomalayan	Indomalayan	Indomalayan	Insectivore	313	313	2726.54	11.6												1		1			2
1	Rhinolophidae	Yinpterochiroptera	Rhinolophus smithersi		1			1	1	Stable	Near Threatened	Near Threatened	Non Endemic	Mainland	Non-islandic	Afrotropic	Afrotropic	Afrotropic	Insectivore	1	1	2726.54	25	1										1	1		1	1		3		1	1	1					3
1	Rhinolophidae	Yinpterochiroptera	Rhinolophus stheno	1						Stable	Least Concern	Least Concern	Non Endemic	Mainland	Non-islandic	Indomalayan	Indomalayan	Indomalayan	Insectivore	342	342	2937.38	7.9							1				1
1	Rhinolophidae	Yinpterochiroptera	Rhinolophus subbadius	1				1		Decreasing	Least Concern	Least Concern	Non Endemic	Mainland	Non-islandic	Indomalayan	Indomalayan	Indomalayan	Insectivore	27	27	2726.54	6.6	1										1	1		1			2
1	Rhinolophidae	Yinpterochiroptera	Rhinolophus subrufus	1				1		Unknown	Data Deficient	Data Deficient	Endemic	Small-ranging islands	Islandic	Indomalayan	Indomalayan	Indomalayan	Insectivore	64	64	2726.54	14.5	1		1								2
1	Rhinolophidae	Yinpterochiroptera	Rhinolophus swinnyi	1	1			1		Unknown	Least Concern	Least Concern	Non Endemic	Mainland	Non-islandic	Afrotropic	Afrotropic	Afrotropic	Insectivore	209	209	2937.38	7.1												1		1			2
1	Rhinolophidae	Yinpterochiroptera	Rhinolophus thomasi					1		Unknown	Least Concern	Least Concern	Non Endemic	Mainland	Non-islandic	Indomalayan	Indomalayan	Indomalayan	Insectivore	193	193	2937.38	8.3	1		1	1							3
1	Rhinolophidae	Yinpterochiroptera	Rhinolophus virgo	1				1		Stable	Least Concern	Least Concern	Endemic	Small-ranging islands	Islandic	Indomalayan	Indomalayan	Indomalayan	Insectivore	91	91	2937.38	6														1			1
1	Rhinolophidae	Yinpterochiroptera	Rhinolophus willardi					1		Decreasing	Endangered	Endangered	Endemic	Mainland	Non-islandic	Afrotropic	Afrotropic	Afrotropic	Insectivore	4	5	2726.54	13.1	1		1											1
1	Rhinolophidae	Yinpterochiroptera	Rhinolophus yunanensis	1				1		Unknown	Least Concern	Least Concern	Non Endemic	Mainland	Non-islandic	Indomalayan	Indomalayan	Indomalayan	Insectivore	77	77	2726.54	19.7												1		1			2
1	Rhinolophidae	Yinpterochiroptera	Rhinolophus ziama	1				1		Decreasing	Endangered	Endangered	Non Endemic	Mainland	Non-islandic	Afrotropic	Afrotropic	Afrotropic	Insectivore	2	2	2726.54	22.3							1				1			1			1
1	Hipposideridae	Yinpterochiroptera	Rhinonicteris aurantia		1			1		Unknown	Least Concern	Least Concern	Endemic	Mainland	Non-islandic	Oceania	Oceania	Oceania	Insectivore	127	127	1834.23	8.8	1		1						1		3					1	1
1	Phyllostomidae	Yangochiroptera	Rhinophylla alethina	1						Unknown	Near Threatened	Near Threatened	Non Endemic	Mainland	Non-islandic	Neotropic	Neotropic	Neotropic	Omnivore	31	31	2064.28	14														1			1
1	Rhinopomatidae	Yinpterochiroptera	Rhinopoma cystops			1		1		Stable	Least Concern	Least Concern	Non Endemic	Mainland	Non-islandic	Afrotropic	Afrotropic	Afrotropic	Insectivore	2082	2082	1888.07	14.2			1		1						2				1		1
1	Rhinopomatidae	Yinpterochiroptera	Rhinopoma hardwickii			1		1		Stable	Least Concern	Least Concern	Non Endemic	Mainland	Non-islandic	Palearctic	Palearctic	Palearctic	Insectivore	2082	2082	1888.07	14.2			1		1						2				1		1
1	Rhinopomatidae	Yinpterochiroptera	Rhinopoma microphyllum			1		1		Stable	Least Concern	Least Concern	Non Endemic	Mainland	Non-islandic	Palearctic	Palearctic	Palearctic	Insectivore	983	983	1888.07	27.9			1		1						2				1		1
1	Rhinopomatidae	Yinpterochiroptera	Rhinopoma muscatellum	1		1		1		Unknown	Least Concern	Least Concern	Non Endemic	Mainland	Non-islandic	Palearctic	Palearctic	Palearctic	Insectivore	95	95	2070.53	14		1		1	1						3
1	Vespertilionidae	Yangochiroptera	Rhogeessa parvula	1				1		Stable	Least Concern	Least Concern	Endemic	Mainland	Non-islandic	Neotropic	Neotropic	Neotropic	Insectivore	87	87	2055.24	4.4
1	Emballonuridae	Yangochiroptera	Rhynchonycteris naso	1				1		Unknown	Least Concern	Least Concern	Non Endemic	Mainland	Non-islandic	Neotropic	Neotropic	Neotropic	Insectivore	1383	1383	894.25	3.8															1		1				1					1
1	Vespertilionidae	Yangochiroptera	Rhyneptesicus nasutus	1	1	1		1		Unknown	Least Concern	Least Concern	Non Endemic	Mainland	Non-islandic	Palearctic	Palearctic	Palearctic	Insectivore	303	303	2400.94	7.9
1	Pteropodidae	Yinpterochiroptera	Rousettus aegyptiacus	1	1	1		1		Stable	Least Concern	Least Concern	Non Endemic	Mainland	Non-islandic	Afrotropic	Afrotropic	Afrotropic	Frugivore	752	752	1825	132.2			1	1			1	1			4				1		1
1	Pteropodidae	Yinpterochiroptera	Rousettus amplexicaudatus	1				1		Unknown	Least Concern	Least Concern	Non Endemic	Mainland	Non-islandic	Indomalayan to Oceania	Indomalayan	Cosmopolitan	Frugivore	843	843	1776.62	82.5	1	1	1	1	1	1	1	1			8	1	1				2
1	Pteropodidae	Yinpterochiroptera	Rousettus amplexicaudatus	1				1		Unknown	Least Concern	Least Concern	Non Endemic	Mainland	Non-islandic	Indomalayan to Oceania	Oceania	Cosmopolitan	Frugivore	843	843	1776.62	82.5	1	1	1	1	1	1	1	1			8	1	1				2
1	Pteropodidae	Yinpterochiroptera	Rousettus celebensis	1				1		Decreasing	Least Concern	Least Concern	Endemic	Small-ranging islands	Islandic	Indomalayan	Indomalayan	Indomalayan	Frugivore	61	61	1776.62	56.3			1	1	1		1				4	1					1
1	Pteropodidae	Yinpterochiroptera	Rousettus lanosus	1	1			1		Decreasing	Least Concern	Least Concern	Non Endemic	Mainland	Non-islandic	Afrotropic	Afrotropic	Afrotropic	Frugivore	71	71	1825	103			1	1			1				3			1			1
1	Pteropodidae	Yinpterochiroptera	Rousettus leschenaultii	1			1	1		Stable	Least Concern	Least Concern	Non Endemic	Mainland	Non-islandic	Indomalayan	Indomalayan	Indomalayan	Frugivore	947	947	1679.86	97.1			1				1	1			3		1		1		2
1	Pteropodidae	Yinpterochiroptera	Rousettus madagascariensis	1			1			Decreasing	Near Threatened	Near Threatened	Endemic	Small-ranging islands	Islandic	Afrotropic	Afrotropic	Afrotropic	Frugivore	70	70	1825	62.1							1				1			1			1
1	Pteropodidae	Yinpterochiroptera	Rousettus obliviosus	1				1		Unknown	Vulnerable	Vulnerable	Endemic	Small-ranging islands	Islandic	Afrotropic	Afrotropic	Afrotropic	Frugivore	4	4	1776.62	44.1			1				1	1			3	1	1	1			3							1	1	2
1	Pteropodidae	Yinpterochiroptera	Rousettus spinalatus	1				1		Decreasing	Vulnerable	Vulnerable	Non Endemic	Land bridges	Islandic	Indomalayan	Indomalayan	Indomalayan	Frugivore	20	20	1825	90.8	1		1	1	1						4			1			1
1	Emballonuridae	Yangochiroptera	Saccolaimus mixtus	1	1			1		Decreasing	Near Threatened	Near Threatened	Non Endemic	Mainland	Non-islandic	Oceania	Oceania	Oceania	Insectivore	19	19	788.4	23														1			1			1
1	Emballonuridae	Yangochiroptera	Saccolaimus saccolaimus	1	1			1		Stable	Least Concern	Least Concern	Non Endemic	Mainland	Non-islandic	Indomalayan to Oceania	Indomalayan	Cosmopolitan	Insectivore	503	503	788.4	41.8												1	1	1			3
1	Emballonuridae	Yangochiroptera	Saccolaimus saccolaimus	1	1			1		Stable	Least Concern	Least Concern	Non Endemic	Mainland	Non-islandic	Indomalayan to Oceania	Oceania	Cosmopolitan	Insectivore	503	503	788.4	41.8												1	1	1			3
1	Emballonuridae	Yangochiroptera	Saccopteryx bilineata	1				1		Unknown	Least Concern	Least Concern	Non Endemic	Mainland	Non-islandic	Neotropic	Neotropic	Neotropic	Insectivore	1534	1534	894.25	7.8														1			1
1	Emballonuridae	Yangochiroptera	Saccopteryx leptura	1				1		Unknown	Least Concern	Least Concern	Non Endemic	Mainland	Non-islandic	Neotropic	Neotropic	Neotropic	Insectivore	1468	1468	894.25	4.7												1		1
1	Vespertilionidae	Yangochiroptera	Scoteanax rueppellii	1						Decreasing	Least Concern	Least Concern	Endemic	Mainland	Non-islandic	Oceania	Oceania	Oceania	Insectivore	77	77	2051.67	26.5														1			1
1	Vespertilionidae	Yangochiroptera	Scotomanes ornatus	1				1		Unknown	Least Concern	Least Concern	Non Endemic	Mainland	Non-islandic	Indomalayan	Indomalayan	Indomalayan	Insectivore	369	369	2051.67	25												1	1	1	1		4
1	Vespertilionidae	Yangochiroptera	Scotophilus heathii	1		1				Stable	Least Concern	Least Concern	Non Endemic	Mainland	Non-islandic	Indomalayan to Paleartic	Indomalayan	Cosmopolitan	Insectivore	758	758	2051.67	34.6			1								1
1	Vespertilionidae	Yangochiroptera	Scotophilus heathii	1		1				Stable	Least Concern	Least Concern	Non Endemic	Mainland	Non-islandic	Indomalayan to Paleartic	Palearctic	Cosmopolitan	Insectivore	758	758	2051.67	34.6			1								1
1	Vespertilionidae	Yangochiroptera	Scotophilus kuhlii	1		1				Stable	Least Concern	Least Concern	Non Endemic	Mainland	Non-islandic	Indomalayan	Indomalayan	Indomalayan	Insectivore	917	917	2051.67	20.7			1				1				2
1	Phyllostomidae	Yangochiroptera	Sturnira lilium	1	1			1	1	Stable	Least Concern	Least Concern	Non Endemic	Mainland	Non-islandic	Neotropic	Neotropic	Neotropic	Frugivore	1862	1862	2064.28	19.1
1	Phyllostomidae	Yangochiroptera	Sturnira parvidens	1				1		Stable	Least Concern	Least Concern	Non Endemic	Mainland	Non-islandic	Neotropic	Neotropic	Neotropic	Frugivore	1862	1862	2064.28	9.1
1	Phyllostomidae	Yangochiroptera	Sturnira tildae	1	1			1		Stable	Least Concern	Least Concern	Non Endemic	Mainland	Non-islandic	Neotropic	Neotropic	Neotropic	Nectarivore	1258	1258	2064.28	24														1			1
1	Molossidae	Yangochiroptera	Tadarida aegyptiaca		1					Unknown	Least Concern	Least Concern	Non Endemic	Mainland	Non-islandic	Palearctic to Afrotropic	Palearctic	Cosmopolitan	Insectivore	611	611	1427.91	16.8															1		1
1	Molossidae	Yangochiroptera	Tadarida aegyptiaca		1					Unknown	Least Concern	Least Concern	Non Endemic	Mainland	Non-islandic	Palearctic to Afrotropic	Afrotropic	Cosmopolitan	Insectivore	611	611	1427.91	16.8															1		1
1	Molossidae	Yangochiroptera	Tadarida brasiliensis	1		1		1		Stable	Least Concern	Least Concern	Non Endemic	Mainland	Non-islandic	Neotropic	Neotropic	Neotropic	Insectivore	1856	1856	1821.51	12.5	1										1
1	Molossidae	Yangochiroptera	Tadarida insignis	1				1		Unknown	Data Deficient	Data Deficient	Non Endemic	Mainland	Non-islandic	Palearctic	Palearctic	Palearctic	Insectivore	93	156	1427.91	31.8	1		1								2
1	Molossidae	Yangochiroptera	Tadarida latouchei	1				1		Decreasing	Data Deficient	Data Deficient	Non Endemic	Mainland	Non-islandic	Indomalayan to Paleartic	Palearctic	Cosmopolitan	Insectivore	53	135	1427.91	22	1		1				1				3
1	Molossidae	Yangochiroptera	Tadarida latouchei	1				1		Decreasing	Data Deficient	Data Deficient	Non Endemic	Mainland	Non-islandic	Indomalayan to Paleartic	Indomalayan	Cosmopolitan	Insectivore	53	135	1427.91	22	1		1				1				3
1	Molossidae	Yangochiroptera	Tadarida teniotis			1		1		Unknown	Least Concern	Least Concern	Non Endemic	Mainland	Non-islandic	Palearctic	Palearctic	Palearctic	Insectivore	743	743	1427.91	27														1	1		2
1	Emballonuridae	Yangochiroptera	Taphozous achates	1				1		Unknown	Data Deficient	Data Deficient	Endemic	Small-ranging islands	Islandic	Indomalayan	Indomalayan	Indomalayan	Insectivore	25	25	788.4	26.6	1										1	1					1
1	Emballonuridae	Yangochiroptera	Taphozous australis	1				1		Decreasing	Near Threatened	Near Threatened	Endemic	Mainland	Non-islandic	Oceania	Oceania	Oceania	Insectivore	36	36	788.4	22.9	1		1								2		1				1
1	Emballonuridae	Yangochiroptera	Taphozous georgianus		1			1		Stable	Least Concern	Least Concern	Endemic	Mainland	Non-islandic	Oceania	Oceania	Oceania	Insectivore	185	185	788.4	27.7	1										1
1	Emballonuridae	Yangochiroptera	Taphozous hamiltoni		1					Unknown	Data Deficient	Data Deficient	Non Endemic	Mainland	Non-islandic	Afrotropic	Afrotropic	Afrotropic	Insectivore	16	25	788.4	22												1					1
1	Emballonuridae	Yangochiroptera	Taphozous hildegardeae	1				1		Decreasing	Vulnerable	Vulnerable	Non Endemic	Mainland	Non-islandic	Afrotropic	Afrotropic	Afrotropic	Insectivore	17	28	788.4	29.6														1			1
1	Emballonuridae	Yangochiroptera	Taphozous hilli		1	1		1		Stable	Least Concern	Least Concern	Endemic	Mainland	Non-islandic	Oceania	Oceania	Oceania	Insectivore	194	194	788.4	22
1	Emballonuridae	Yangochiroptera	Taphozous longimanus	1	1			1		Stable	Least Concern	Least Concern	Non Endemic	Mainland	Non-islandic	Indomalayan to Paleartic	Palearctic	Cosmopolitan	Insectivore	686	686	788.4	26.9			1	1							2
1	Emballonuridae	Yangochiroptera	Taphozous longimanus	1	1			1		Stable	Least Concern	Least Concern	Non Endemic	Mainland	Non-islandic	Indomalayan to Paleartic	Palearctic	Cosmopolitan	Insectivore	686	686	788.4	26.9			1	1							2
1	Emballonuridae	Yangochiroptera	Taphozous melanopogon	1				1		Unknown	Least Concern	Least Concern	Non Endemic	Mainland	Non-islandic	Indomalayan	Indomalayan	Indomalayan	Insectivore	934	934	788.4	25.9	1		1		1		1				4	1		1			2
1	Emballonuridae	Yangochiroptera	Taphozous nudiventris		1	1		1	1	Stable	Least Concern	Least Concern	Non Endemic	Mainland	Non-islandic	Palearctic	Palearctic	Palearctic	Insectivore	255	255	788.4	30.1															1		1
1	Emballonuridae	Yangochiroptera	Taphozous perforatus		1				1	Stable	Least Concern	Least Concern	Non Endemic	Mainland	Non-islandic	Afrotropic	Afrotropic	Afrotropic	Insectivore	427	427	788.4	27.3			1								1
1	Emballonuridae	Yangochiroptera	Taphozous theobaldi	1				1		Unknown	Least Concern	Least Concern	Non Endemic	Mainland	Non-islandic	Indomalayan	Indomalayan	Indomalayan	Insectivore	189	189	788.4	39.8				1			1	1			3
1	Emballonuridae	Yangochiroptera	Taphozous troughtoni		1			1		Decreasing	Least Concern	Least Concern	Endemic	Mainland	Non-islandic	Oceania	Oceania	Oceania	Insectivore	108	108	788.4	32.5
1	Thyropteridae	Yangochiroptera	Thyroptera tricolor	1	1			1		Unknown	Least Concern	Least Concern	Non Endemic	Mainland	Non-islandic	Neotropic	Neotropic	Neotropic	Insectivore	1100	1100	2070.53	4.4														1
1	Molossidae	Yangochiroptera	Tomopeas ravus					1		Decreasing	Endangered	Endangered	Endemic	Mainland	Non-islandic	Neotropic	Neotropic	Neotropic	Insectivore	31	31	1427.91	5.6								1			1			1			1
1	Phyllostomidae	Yangochiroptera	Tonatia bidens	1	1			1		Unknown	Data Deficient	Data Deficient	Non Endemic	Mainland	Non-islandic	Neotropic	Neotropic	Neotropic	Omnivore	281	500	2064.28	27.2														1			1
1	Phyllostomidae	Yangochiroptera	Trachops cirrhosus	1	1			1		Stable	Least Concern	Least Concern	Non Endemic	Mainland	Non-islandic	Neotropic	Neotropic	Neotropic	Omnivore	1525	1525	2064.28	37.7
1	Hipposideridae	Yinpterochiroptera	Triaenops afer	1	1			1		Unknown	Least Concern	Least Concern	Non Endemic	Land bridges	Islandic	Afrotropic	Afrotropic	Afrotropic	Insectivore	250	250	1834.23	12	1										1
1	Hipposideridae	Yinpterochiroptera	Triaenops parvus		1					Unknown	Data Deficient	Data Deficient	Non Endemic	Mainland	Non-islandic	Afrotropic	Afrotropic	Afrotropic	Insectivore	1	1	1834.23	12			1		1						2				1		1
1	Hipposideridae	Yinpterochiroptera	Triaenops persicus		1					Unknown	Least Concern	Least Concern	Non Endemic	Mainland	Non-islandic	Palearctic to Afrotropic	Palearctic	Cosmopolitan	Insectivore	230	230	1834.23	12.6	1										1
1	Hipposideridae	Yinpterochiroptera	Triaenops persicus		1			1		Unknown	Least Concern	Least Concern	Non Endemic	Mainland	Non-islandic	Palearctic to Afrotropic	Afrotropic	Cosmopolitan	Insectivore	230	230	1834.23	12.6	1										1
1	Hipposideridae	Yinpterochiroptera	Triaenops rufus	1				1		Unknown	Least Concern	Least Concern	Endemic	Small-ranging islands	Islandic	Afrotropic	Afrotropic	Afrotropic	Insectivore	57	57	1834.23	10.5							1				1			1	1		2
1	Vespertilionidae	Yangochiroptera	Tylonycteris fulvida	1				1		Unknown	Data Deficient	Data Deficient	Non Endemic	Mainland	Non-islandic	Palearctic	Palearctic	Palearctic	Insectivore	695	695	2055.24	3.6
1	Vespertilionidae	Yangochiroptera	Tylonycteris pachypus	1						Unknown	Least Concern	Least Concern	Non Endemic	Mainland	Non-islandic	Indomalayan	Indomalayan	Indomalayan	Insectivore	695	695	2055.24	3.6			1		1						2	1		1			2
1	Vespertilionidae	Yangochiroptera	Tylonycteris pygmaeus	1					1	Unknown	Data Deficient	Data Deficient	Endemic	Mainland	Non-islandic	Palearctic	Palearctic	Palearctic	Insectivore	1	1	2055.24	2
1	Vespertilionidae	Yangochiroptera	Tylonycteris robustula	1						Unknown	Least Concern	Least Concern	Non Endemic	Mainland	Non-islandic	Indomalayan	Indomalayan	Indomalayan	Insectivore	478	478	2055.24	7.6			1		1						2	1		1			2
1	Vespertilionidae	Yangochiroptera	Tylonycteris tonkinensis	1				1		Unknown	Data Deficient	Data Deficient	Endemic	Mainland	Non-islandic	Palearctic	Palearctic	Palearctic	Insectivore	695	695	2055.24	3.6
1	Phyllostomidae	Yangochiroptera	Vampyressa pusilla	1	1					Unknown	Data Deficient	Data Deficient	Non Endemic	Mainland	Non-islandic	Neotropic	Neotropic	Neotropic	Omnivore	156	156	2064.28	8.6
1	Phyllostomidae	Yangochiroptera	Vampyrum spectrum	1	1			1		Decreasing	Near Threatened	Near Threatened	Non Endemic	Mainland	Non-islandic	Neotropic	Neotropic	Neotropic	Carnivore	707	707	2064.28	167.7														1			1
1	Vespertilionidae	Yangochiroptera	Vespadelus caurinus	1	1			1		Stable	Least Concern	Least Concern	Endemic	Mainland	Non-islandic	Oceania	Oceania	Oceania	Insectivore	97	97	2055.24	4			1		1		1				3
1	Vespertilionidae	Yangochiroptera	Vespadelus douglasorum	1	1			1		Unknown	Least Concern	Least Concern	Endemic	Mainland	Non-islandic	Oceania	Oceania	Oceania	Insectivore	31	31	2055.24	5																				1						1
1	Vespertilionidae	Yangochiroptera	Vespadelus finlaysoni	1	1	1		1		Stable	Least Concern	Least Concern	Endemic	Mainland	Non-islandic	Oceania	Oceania	Oceania	Insectivore	458	458	2055.24	5
1	Vespertilionidae	Yangochiroptera	Vespadelus pumilus	1						Decreasing	Least Concern	Least Concern	Endemic	Mainland	Non-islandic	Oceania	Oceania	Oceania	Insectivore	39	39	2055.24	4.4													1	1			2
1	Vespertilionidae	Yangochiroptera	Vespadelus troughtoni	1				1		Unknown	Least Concern	Least Concern	Endemic	Mainland	Non-islandic	Oceania	Oceania	Oceania	Insectivore	139	139	2055.24	5.5													1				1
1	Phyllostomidae	Yangochiroptera	Vespertilio murinus	1		1		1		Stable	Least Concern	Least Concern	Non Endemic	Mainland	Non-islandic	Palearctic	Palearctic	Palearctic	Insectivore	1979	1979	1599.65	18.7	1										1		1				1
1	Vespertilionidae	Yangochiroptera	Vespertilio sinensis	1		1		1		Unknown	Least Concern	Least Concern	Non Endemic	Mainland	Non-islandic	Palearctic	Palearctic	Palearctic	Insectivore	306	306	1599.65	24.5								1			1				1	1	2
